# Supplementary material for: Avian Pattern Recognition Receptor Sensing and Signaling
Source: PubMed Central journal article supplement (PMC7157566; doi:10.3390/vetsci7010014), 2020-01-27
Supplement: vetsci-07-00014-s001.pdf [file vetsci-07-00014-s001.pdf]

**Table S1:** Accession numbers of PRR protein sequences used for multiple sequence alignments and reviewed in the present manuscript.

| PRR protein | Chicken        | Duck           | Goose          |
|-------------|----------------|----------------|----------------|
| TLR2t1      | NP_989609.1    | XP_005021002.2 | XP_013030624.1 |
| TLR2t2      | NP_001155122.1 | NP_001297277.1 | -              |
| TLR1t1      | NP_001007489.4 | NP_001297353.1 | XP_013041417.1 |
| TLR1t2      | XP_025005535.1 | XP_027312049.1 | -              |
| TLR3        | NP_001011691.3 | NP_001297711.1 | XP_013035229.1 |
| TLR4        | NP_001025864.1 | NP_001297342.1 | XP_013038385.1 |
| TLR5        | NP_001019757.1 | NP_001297753.1 | XP_013029406.1 |
| TLR7        | NP_001011688.1 | XP_005029235.1 | XP_013046996.1 |
| TLR21       | NP_001025729.1 | KY829021       | AMB20882.1     |
| TLR15       | NP_001032924.1 | XP_005018927.2 | XP_013046493.1 |
| RIG-I       | -              | NP_001297309.1 | NP_001298119.1 |
| MDA-5       | NP_001180567.1 | NP_001297740.1 | XP_013026596.1 |
| LGP2        | NP_001305337.1 | XP_027301625.1 | XP_013055203.1 |
| DDX1        | NP_989894.1    | XP_027311055.1 | XP_013028107   |
| DDX21       | XP_001232052   | XP_027316557.1 | XP_013030257.1 |
| DHX36       | XP_015147310.1 | XP_027320349.1 | XP_013048509.1 |
| DDX3X       | NP_001025971.1 | XP_005012555.2 | XP_013046370.1 |
| DDX23       | XP_025001441.1 | XP_021135293.1 | XP_013054789.1 |
| DDX24       | NP_065147.1    | XP_025006699.1 | XP_027314331.1 |
| DDX60       | XP_004940975.1 | XP_027312235.1 | XP_013030722.1 |
| DDX41       | NP_001336637.1 | XP_027324165.1 | XP_013047316.1 |
| DHX36       | XP_015147310.1 | XP_027320349.1 | XP_013048508.1 |
| OASL        | XP_015148492.1 | ARS01326.1     | XP_013047372.1 |
| cGAS        | XP_419881.4    | XP_027310983.1 | XP_013027663.1 |
| STING       | XP_025010645.1 | XP_027323921.1 | XP_013057484.1 |
| ERADp       | NP_001185786.1 | XP_027323010.1 | XP_013042385.1 |

A5YBP4\_CHICK 1 MGSL----TSIYVFACVFLSILWNNIQPTVENKITANYSGHLLTEVPKNI PVHTHILDLS  
NP\_001297353.1 1 MGSL----TSIYIFACVFTLTLWNNVQPTVENEFIANYSSILLTDVPKTIPLHTRVLDLS  
XP\_013041417.1 1 MGSL----TSIYVFACVFTLTLWNNIHPTVENEFIANYSSI LLTDVPKNIPLHTRVLDLS  
TLR1\_HUMAN 1 M-----TSIHFHFAIFMLILQIRIQLSESESEFLVDRSKNGLIHVPKDISQKTTILNIS  
TLR6\_HUMAN 1 MTKDKEPIVKSEHFVCLMIILVGTIRIQFSGDNEFAVDKSKRGLIHVPKDIPLKTKVLDMS  
TLR10\_HUMAN 1 MRLI-----RNLYIFCSIVMTAEGDAPELPEERELMTNCSNMSLRKVPADLTPATTTLDLS

A5YBP4\_CHICK 57 HNSISEITNFRFTSLSDLQVLNLSHNLITELDFSAFMFNQDLEYLDLSHNNIWTAYCQLL  
NP\_001297353.1 57 HNRISELSISEFISLSDLQVLNLSHNLITELDFNVFIFNODLEYLDLSHNNIWKVYCQTL  
XP\_013041417.1 57 HNRISELSISEFISLSDLQVLNLSHNLITELDFNIFIFNODLEYLDLSHNNIWKVYCQTL  
TLR1\_HUMAN 54 QNYISELWTSIDL SLSKLRILII SHNRIOYLDISVEKFNQLEYLDLSHNNKLVKISCHPT  
TLR6\_HUMAN 61 QNYIAELQVSDMSFLSFLTVLRLSHNRIQLLDLSVFKFNQDLEYLDLSHNNIQKISCHPT  
TLR10\_HUMAN 57 YNLLFQLQSSDFHSVSKLRVLIILCHNRIOQLDKTEEFNKELRYLDLSNNRKISVTWYLL

A5YBP4\_CHICK 117 ARLRHLDLSFNKFTVLPICQEFGIMFHLEYLGLSAMIIRSDFRYVAHLQLD TVVFLTLED  
NP\_001297353.1 117 ACLRHLDLSFNNTFTVLPICQEFGTMFHLEYLGLSATMIRSDFRYITHLQLNTVFLTLEN  
XP\_013041417.1 117 SCLRHLDSL FNNTFTVLPICQEFGTMFHLEYLGLSAMIIRSDFRHITHLQLNTLFLTLEK  
TLR1\_HUMAN 114 VNLKHLDSL FNAFDALPICKEFGNMSQLKFLGLSTTHLEKSSVLP IAHLNISKVLLVLGE  
TLR6\_HUMAN 121 VSFRHLDSL FNDFKALPICKEFGNISQLNFGLSAMKIQKLDLLPIAHLHLSYILLDLRN  
TLR10\_HUMAN 117 AGLRYLDLSFNDFDTMPICEEAGNMSHLEILGLSGAKIQKSDFQKIAHLHLNTVFLGFRT

A5YBP4\_CHICK 177 FSL--YEPLSLTALNTRSLHIVFATNQNFNFSLLYDGMSTSEKLVNIRYTL SHK---D  
NP\_001297353.1 177 FSL--YKPSLTALNTRKSLHIVFSANQNFNFSLLYDGMSTSENKLVNIRYTL SYK---D  
XP\_013041417.1 177 FSL--YEPQSLTALNTRKSLHIVFSENQNFNFSLLYDGMSTSENKLVNIRYTL SYK---D  
TLR1\_HUMAN 174 TYGEKEDEPEGLQDFNTESLHIVFPTNKEEFHFI-LDVSVKTVANIELSNIKCVLEDNKCSY  
TLR6\_HUMAN 181 YYIKENETESLQILNAKILHIVFHPTSLFAIQ-VNISVNTLGCLQITNIKLNDD--NCQV  
TLR10\_HUMAN 177 LPH--YEEGSLPILNTTKLHIVLPMDTNEFWVL-LRDGIKTSKILEMTNIDGKSQFV---S

A5YBP4\_CHICK 232 FPSPSLELQKKIKATDMLD TVDLEWTVILQIFLLVWDSSEVHLTVRNLI FRGPIVVELTE  
NP\_001297353.1 232 FPSPALTLKKIKTTA LMLD TVDLEWPIILQIFLLI WYSPVEHLTVRNLI FRGPIGGLTA  
XP\_013041417.1 232 FPSPSLKLLKKIKTTT LMLD TVDLEWPIILQIFLLI WYSPVENLTVRNLI FRGPIGVLTTP  
TLR1\_HUMAN 233 FLSILAKLQTNPKLSNLT LNNIETTNSFIRILQLVWHTTVWYFSTSNVKLQQLD-F--  
TLR6\_HUMAN 238 FIKFLSELTRGSTLLNFTLNHIETT WKCLVRV FQFLWPKPVEYLNINLT IIESIR-E--  
TLR10\_HUMAN 231 YEMQRNLSLENAKTSVLLLNKVDLLWDDLFLILQFVWHTSVEHFQIRNVTFGGKAY-L--

A5YBP4\_CHICK 292 YKHVPLLRSLLEQLLSLGS SSMKALTLEVRNKL Y YFNQ E ILYRQFSEMNI DS LTIH DACMP  
NP\_001297353.1 292 YK FVPFLS SLEQVMSLGV SSMKALTLEVRNKV Y YFNQ K ILYRWFSEMNI AS LTIY DAYMP  
XP\_013041417.1 292 EK FVPFLS SLEQVMSL D VSMK V L TLEHVRNKV Y YFNQ E ILYREFSEMNI AN LTIY DAYMP  
TLR1\_HUMAN 290 -----RDFDYSGTS L KALS I HQVSDV FGFPOS Y IYE I FSNMNIKNFTV S GTRMV  
TLR6\_HUMAN 295 -----E DFTYSK TTI KALTI E HITNQV FLESQTAL YTV FSEMNI MLTISDTPFI  
TLR10\_HUMAN 288 -----DHNSFDYSNTVMRTIKLEHVHFRV EYIQD KTYLL LTKMDIENLTISNAQMP

A5YBP4\_CHICK 352 HMLCPKPKSS FQYINFSRNAL TDEL FQNC DTLANL KIL I LHRNK FESLSKV S FMTSRMKS  
NP\_001297353.1 352 HMLCPQ RASL FQYLNFSRNAL TDEL FQNC STLAE LKLFIL RNRNK FESLSKV S SMTR YMK S  
XP\_013041417.1 352 HMLCPEKASS FQYLNFSRNAL TDEL FQNC STLAD LKLL I LKRNK FESLPKV S SMTR HMKS  
TLR1\_HUMAN 340 HMLCPSKISPFLHLDFSNLLD TDTV FENCGHLTELE TL I LQMNQLKELSK I AEMTQMK S  
TLR6\_HUMAN 345 HMLCPHAPSTEFKFLNFTQNVETDS IFEKCS TLVKLE TL I LQKNG LKDLFKVGLMTRKDMPS  
TLR10\_HUMAN 340 HMLFPNYPTK FQYLNFA NN I L TDELEKRTIQ LPHLKT L I L N G N K L E I L S L V S C F A N N - T P

A5YBP4\_CHICK 412 LRYLDMSSNLLRNSRAEGRCQWADSLAE L D LSSNQLTEAVFE CLPANINKV DLQNNQIAN  
NP\_001297353.1 412 LRYLDMSSNLLHTDGAE EHCQWTESL KELD LSSNQLTESVFGCLPVNVNKLDLHNNQISS  
XP\_013041417.1 412 LRYLDMSSNLLRNDGAE EHCQWTESL MELD LSSNQLTESVFGCLPVNVNKLDLQNNQIAS  
TLR1\_HUMAN 400 LQQLDISQNSVSYDEKKGDCSWTKSLSLN M S S N I L T D T I F R C L P P R I K V L D L H S N K I K S  
TLR6\_HUMAN 405 LEILDVSWNSLESGRHKENC TWVES I V V L N L S S N M L T D S V F R C L P P R I K V L D L H S N K I K S  
TLR10\_HUMAN 399 LEHLDISQNL LQHK-NDENC SWPETV V V N M N L S Y N K L S D S V F R C L P K S I Q I L D L N N N Q I Q T

A5YBP4\_CHICK 472 VPKGITELHSLQELN LASNRLADLP GCGRA FTGLE I LNIERNL I L I P S A D F F E T C P S V K E L  
NP\_001297353.1 472 VPQGI AELKSLKELN LASNRLADLP GCGGFSALE I L N M E M N S I L S P S A D F L E S C Q R V R E L  
XP\_013041417.1 472 VPQGI AELKSLKELN LASNRLADLP GCGGFSALE F L N M E M N S I L T P S A D F F E S C Q R V R E L  
TLR1\_HUMAN 460 I P K Q V V K L E A L Q E L N V A F N S L T D L P G C G S F S S L S V L I I D H N S V S H P S A D F F Q S C Q K M R S I  
TLR6\_HUMAN 465 V P K Q V V K L E A L Q E L N V A F N S L T D L P G C G S F S S L S V L I I D H N S V S H P S A D F F Q S C Q K M R S I  
TLR10\_HUMAN 458 V P K E T I H L M A L R E L N I A F N F L T D L P G C S H E S R L S V L N I E M N F I L S P S L D F V Q S C Q E V K T L

A5YBP4\_CHICK 532 QAGQNPFKCSCELODFIR- LERQSGGKLSGWPEAYVCKYPEDLSGTQLKDFHLTELACNT  
NP\_001297353.1 532 EAGHNPFKCSCELOQAFVR- LERQSGGKLSGWPEAYVCEYPEDLKG TQLKDFHLTELACNT  
XP\_013041417.1 532 EAGHNPFKCSCELOQAFMR- LERQSGGKLSGWPEAYVCEYPEDLRGTQLKDFHLTELACNT  
TLR1\_HUMAN 520 KAGDNPFQCTCELGEFVKNIDQVSSEVLEGWPD SYKCDYPE SYRG TLLKDFHMS ELS CNI  
TLR6\_HUMAN 525 KAGDNPFQCTCELREFVKNIDQVSSEVLEGWPD SYKCDYPE SYRGS PLKDFHMS ELS CNI  
TLR10\_HUMAN 518 NAGRNPFRCTCELKNFIQ-LETYSEVMVGVSDSYTCEYPLNLRGTRLKDVHLHELSCNT

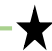

A5YBP4\_CHICK 591 TLLIVTALLL--TLVLVAVVAFLCIYLDVPWYVRMLWQWTQTKRRAWHDCPEERETALQF  
NP\_001297353.1 591 TLLIVTALLLLLTTLVLVGVVAFLCIYLDVPWYVRMLWQWTQTKRRAWHDCPEERETVQLQF  
XP\_013041417.1 591 TLLIVTALLL--TLVLVGVVAFLCIYLDVPWYVRMLWQWTQTKRRAWHDCPEERETVQLQF  
TLR1\_HUMAN 580 TLLIVTIVAT--MLVLAVTVTSLCSYLDLPWYLRMVCQWTQTRRRARNIPL EELQRNLQF  
TLR6\_HUMAN 585 TLLIVTIGAT--MLVLAVTVTSLCIYLDLPWYLRMVCQWTQTRRRARNIPL EELQRNLQF  
TLR10\_HUMAN 577 ALLIVTIVVI--MLVLGLAVAFCLHFDLPWYLRMLGQCTQTWHRVRKTTQEQQLKRNVRF

A5YBP4\_CHICK 649 HAFISYSERDSI WVKNELIPNLEKGE GECIQICQHERNFIPGKSIVENI INCI EKSYKSIF  
NP\_001297353.1 651 HAFISYSERDSV WVKTELIPNLEKGE GSVRICQHERNFVPGKSIVENI INCI DKSYSKIF  
XP\_013041417.1 649 HAFISYSERDSV WVKNELIPNLEKGE GSVQICQHERNFVPGKSIVENI INCI DKSYSKIF  
TLR1\_HUMAN 638 HAFISYSGHDSF WVKNELIPNLEKEG--MQICLHERNFVPGKSIVENI ITCI EKSYKSIF  
TLR6\_HUMAN 643 HAFISYSEHDSA WVKSELVPYLEKED--IQICLHERNFVPGKSIVENI INCI EKSYKSIF  
TLR10\_HUMAN 635 HAFISYSEHDSI WVKNELIPNLEKEDG SILICLYESYFDPGKSISENIVSFI EKSYKSIF

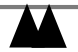

A5YBP4\_CHICK 709 VLSPNFVQSEWCHYELYFAH HKLFSENSNSLILILLEPIPPYVIPARYHKLKALMAKRTY  
NP\_001297353.1 711 VLSPNFVQSEWCHYELYFAH HKLFSENCNSLILILLEPIPOYVIPARYHKLKALMAKRTY  
XP\_013041417.1 709 VLSPNFVQSEWCHYELYFAH HKLFSENCNSLILILLEPIPOYVIPARYHKLKALMAKRTY  
TLR1\_HUMAN 696 VLSPNFVQSEWCHYELYFAH HNLFHEGSNLILILLEPIPOYSIPSSYHKLKSLMARRTY  
TLR6\_HUMAN 701 VLSPNFVQSEWCHYELYFAH HNLFHEGSNLILILLEPIPONSIPNKYHKLKALMTQRTY  
TLR10\_HUMAN 695 VLSPNFVQNEWCHYEFYFAH HNLFHENS DHIILILLEPIPFYCIPTRYHKLKALLEKKAY

A5YBP4\_CHICK 769 LEWPKERSKHALFWANLRAAISINLSVADEQNRTEV-----  
NP\_001297353.1 771 LEWPKERSKRALFWANLRAAINVNLPMSEFEGNEEEN-----DVTFTDSITQPLIK  
XP\_013041417.1 769 LEWPKERSKRALFWANLRAAININLPKSFEANEEN-----DVTSTGSI TQPLIK  
TLR1\_HUMAN 756 LEWPKESKRGLFWANLRAAINIKLTEQAK-----K-----  
TLR6\_HUMAN 761 LQWPKEKSKRGLFWANIRAAFNMKLTIVTENNDVKS-----  
TLR10\_HUMAN 755 LEWPKDRRKCGLFWANLRAAINVNLATREMYELQTFTELNEESRGS TISLMRTDCL--

**Figure S1:** The protein sequences of chTLR1t1, duTLR1t1, goTLR1, hTLR1, hTLR6, and hTLR10 aligned using the ClustalW program. Conserved amino acids and synonymous substitutions are shadowed in black and gray, respectively. The cytoplasmic (TIR) domain, the TM region, the extracellular domain with the conserved cysteine-rich CT region (LRR-CT), LRR1–19 and signal peptide are indicated below the sequence in orange, grey, blue, light green, black and orange respectively. Conserved proline and glycine in the BB loop of TIR domain that facilitates interaction with TLR2 to promote signaling are highlighted with black triangles. The asterisk at position 588 marks the conserved cysteine residue.

NP\_001032924.1 1 MRILIGSLYFYFISFLFSVNGFLTORTSPVSSFPFYNYSYLNLSSVSQAQAPKTARALN  
XP\_005018927.2 1 MGILIRSLHFYFISFLLSRANGFLTWRTTESAFPFYNYSYLNLSSVSEAQAPKMARALN  
XP\_013046493.1 1 MGILIRSLHFYFISFLFSRANGFLTWRTPTESAFPFYNYSYLNLSSVSQAQAPKMARALN

NP\_001032924.1 61 FSYNIAIEKIKTRDFEGFHVLEVLDSLHNHFKDIEPGAFENLLSLVSVDLFSFNDKNLLVSG  
XP\_005018927.2 60 FSHNIIIEKIKTRDFEGFDALEVLDSLNOIKDIEPGTFEILLSLVSVNLSFNDKLLVSG  
XP\_013046493.1 61 FSHNIIIEKIKTRDFEGFDALEVLDFSYNRIKDIEPSTFETMLSLVSVNLSFNDKLLVSG

NP\_001032924.1 121 LAPHLKLLPTSGASGPSQIYMYFQKSAEAALEPSAPAEILLPHLEDPPNPGNVNPRFRQ--  
XP\_005018927.2 120 LAPHLKLLATSRRAS-----DKSTEAALPPASAEELPHSGSPDLQKINRLRRST  
XP\_013046493.1 121 LAPHLKLLATSRRAS-----DKSTEAALPPASAEELPHSGSPDLQKVNRLRRST

NP\_001032924.1 179 ---RRTEENKTSPPAATLRPDLGAPINGLLDLSRIKLSNEELAKLDAADLCOAQLGIVL  
XP\_005018927.2 171 RHLRRAEENTMVSPTATLRPNRCGLPINGTLDLSKSKLSEELTEKLPDLCQAQLDGVL  
XP\_013046493.1 172 RHLPRAEENTTVSPTATLRPNRCGLPINGTLDLSKSKLSEELMEKLPDLCQAQLDSVL

NP\_001032924.1 236 EFNISHSDLEMDLLSLFILFLPMKDIQSVDASYNRITINNIDVEAICHPFSNLSFVNIS  
XP\_005018927.2 231 ELDISHNDLEMDLLSLFILFLPMKNVQSIDVSYNNITINNIDVEAICRFPSNLSFVNIS  
XP\_013046493.1 232 ELDISHNDLEMDLLSLFILFLPMKNVQSIDASYNNTIDNIDVEAICRFPSNLSFVNIS

NP\_001032924.1 296 NNPLNLETICLPPTITVIDLSFTNISVIPQNFACKLFNLENMYVQGNHFITYVHPKPTN  
XP\_005018927.2 291 NNPLNLETICLPPTITVIDLSFTNISVIPQNFACKLFNLENMYVQGNHFITYVHPKPTN  
XP\_013046493.1 292 NNPLNLETICLPPTITVIDLSFANVSVIPQNFACKLFNLENMYVQGNHFITYVHPKPTN

NP\_001032924.1 356 ATPRPPPGTVQISAISLVRNQAGTPIESLPESVKHLKSNCSIVELPEWFANRMQELLFL  
XP\_005018927.2 351 TAPKFAPGTVHISAISLVRNQAGTPIESLPEKVKHLKISNCSIVELPEWFANRMQELLFL  
XP\_013046493.1 352 TAPKFAPGTVHISAISLVRNQAGTPIESLPEKVKHLKISNCSIVELPEWFANRMQELLFL

NP\_001032924.1 416 DLSSNRISMLPDLPLSLQQLDISNSDIKIIPRFKLSNLTVFNIQNNKTMHPEYFPL  
XP\_005018927.2 411 DLSSNRISMLPDLPLSLQQLDISNSDIKIIPPSFKLSNLTVFNIQNNKVTDMHPEYFPL  
XP\_013046493.1 412 DLSSNRISMLPDLPLSLQQLDISNSDIKIIPPSFKLSNLTVFNIQNNKVTDMHPEYFPL

NP\_001032924.1 476 TLTKCDISKNKLVLSLTKALENLES LNVS GNLI TRLE PACQLPS LTNLDS SHNLI SELP  
XP\_005018927.2 471 TLTKCDISKNKLSVLSLTKTIGKLEFLNVS RNLI TRLEPTSQL LTNLDGSHNLI SELP  
XP\_013046493.1 472 TLTKCDISKNKLNVLSTKTIGKLEFLNVS RNLI TRLEPTSQFL LTNLDGSHNLI SELP

NP\_001032924.1 536 DHLGQSLMLKHFNLSGNKISFLQRGSLPASTEELDISDNAITTVQDTFGQLTSLSLT  
XP\_005018927.2 531 DHFGKSLPMLKYFNLSGNKISFLQRGSLPVSLMELDISDNAITTTAEDTFGQLTSLSILT  
XP\_013046493.1 532 DRFGKSF PMLKYFNLSGNKISFLQRGSLPVSLMELDISNNAITTVEDTFGQLTSLSILT

NP\_001032924.1 596 VQKHFNCNDLYWVFN YIRNPHLQINGKDDLRCSPDRRGSVKS SNLTLHCSLGI  
XP\_005018927.2 591 VQKHFNCNDLYWVNVYIHTPHLQINGKENLRCSFPDRRGSVEGSNLTLHCSLGI  
XP\_013046493.1 592 VQKHFNCNDLYWVNVYIHIPIYLQINGKENLRCSFPDRRGSVEGSNLTLHCSLGI

NP\_001032924.1 656 QMAITACVA LVVLVLTGLCWRFDGLWYVRMGWYWCMAKRQYKKRPNKPFDAFI-SYS  
XP\_005018927.2 651 QMAITACVAVLVVLVLTGLCWRFDGLWYVVMGWYWCMAKRKQYKKRPNKPFDAFI-SYS  
XP\_013046493.1 652 QMAITACVAVLVVLVLTGLCWHFDGLWYVRMGWYWC TAKRQYKKRPNKPFDAFDASYS

NP\_001032924.1 715 EHDADWTKEHLKLETDGFKICYHERDFKPGHPVLGNIFYCIENSHKVLFLVLSPSFVNS  
XP\_005018927.2 710 EHDANWTKENLLERLVRLTDGFKICYHERDFKPGHPVLGNIFNCIENSHKVLFLVLSPSFVNS  
XP\_013046493.1 712 EHDADWTKENLLERLVRLTDGFKICYHERDFKPGHPVLGNIFYCIENSHKVLFLVLSPSFVNS

NP\_001032924.1 775 CWCQYELYFAEHRVLDENQDSLIMVLEDLPPDSVPQKFSKLRKLLKRKTYLKWSPEEHK  
XP\_005018927.2 770 CWCQYELYFAEHQVLNENQDSLIMIVLEDLPPNSVPQKFSKLRKLLKRKTYLKWSPEEHK  
XP\_013046493.1 772 CWCQYELYFAEHRVLDENQDSLIMIVLEDLPLNSVPQKFSKLRKLLKRKTYLKWSPEEHK

NP\_001032924.1 835 QKIFWHQLAAVLKTTNEPL-VRAENGPNEVDIEME  
XP\_005018927.2 830 QKIFWHQLAAVLKTTNEPFLVRAENGPPTQDMYEME  
XP\_013046493.1 832 QKIFWHQLAAVLKTTNERFLVRAENGSTQDMYEME

**Figure S2:** Schematic alignment of TLR15 protein sequences of chicken, duck and goose. Depicted are the predicted signal sequence, the N-terminal LRR (LRR-NT), 19 LRRs, the C-terminal LRR (LRR-CT), the transmembrane domain (TM), and the TIR domain in blue, red, black, orange, green and purple underlining respectively. The proline-rich loop (aa 359–363) is boxed in black.



XP\_004948095.1 1 MSWAMQYHGCLPWESWT---RLCGSQPSRRAARCVYLCASGPGAAGSCFHRKILHIGG-  
XP\_027300205.1 1 MSRAMQGRGCLPWACLG-----PYLRAASLPGAAGGSFHGKILSGAS-  
XP\_013042726.1 1 -----AGGSFRGKILSGDS-  
NP\_001269072.1 1 MRWCHH---LPRASWGSGRRALQRDDR---IPFLIHWSWP-----LOGERP

XP\_004948095.1 57 TSLPSRSCVRYKGGSQENRAQRSSSHGGLDHLRNVASSDAIKKHQKSLSAWFSNQNEER  
XP\_027300205.1 43 ISLP-RSCVRHQGGPQGPPAQRGSSRHGLDHLRTVASSDAIKKHQKSLAAWFSNQPSSEER  
XP\_013042726.1 15 GSLP-RSCVRHQGGSQGPPAQRGSSRHGLDHLRTVASSDAIKKHQKSLAAWFSNQNEER  
NP\_001269072.1 43 FGPP-RAFIIRHGGSSVDSAP--PPGRHGR-LFPSASATFAIQHRNLAEWFSRLPREER

XP\_004948095.1 117 QFGPSFSLDAHVDPVIRESSLEQILKPSPELTIQHQLQPCROVISLQNLFDVDACGRQ  
XP\_027300205.1 102 QFGPSFSLDAVHVDPVIRESSLEQILKPSPELTIQHQLQRSSRVISLQNLFDACGRQ  
XP\_013042726.1 74 QFGPSFSLDAVHVDPVIRESSLEQILKPSPELTIQHQLQRSSRQVISLQNLFDVDACGRQ  
NP\_001269072.1 99 QFGPIFALDTHVDPVIRESPDEILRPPAELAEHQPPQAGLPPALSOLFNPDACGRR

XP\_004948095.1 177 VKNVLYGTVGTGKSTLIKKMVVDWCHGLLPRFELVIPFSCEDLSH-SHVPISLRRLVTK  
XP\_027300205.1 162 VKNVLYGTVGTGKSTLIKKMVVDWCHGLLPRFELVIPFSCEDLSH-SRVPISLRRLVTK  
XP\_013042726.1 134 VKNVLYGTVGTGKSTLIKKMVVDWCHGLLPRFELVIPFSCEDLSH-SRVPISLRRLVTK  
NP\_001269072.1 159 VQTAVLYGTVGTGKSTLVRKMVLDWCYGRLPAPFELVIPFSCEDLSLGPAPASLQQLVAQ

XP\_004948095.1 236 KYQHLLRDVAPLLGSSNLKVLFILNGLERLNLDLDFRLAGTELCCDANEPVPPSAIVNLLRK  
XP\_027300205.1 221 KYQHLLRDVAPLLGASNLKVLFILNGLERLNLDLDFRLAGTELCCDPSSEPIAPSAIVNLLRK  
XP\_013042726.1 193 KYQHLLRDVAPLLGASNLKVLFILNGLERLNLDLDFRLAGTELCCDPEPIAPSAIVNLLRK  
NP\_001269072.1 219 RYTPLKQVLPMAAAGSHLFLHGLEHLNLDLDFRLAGTGLCSDPPEPQEPAAIVNLLRK

XP\_004948095.1 296 YLLPEASIIVTTTRPSAVRRIPGKYVGRYAEICGFSDTNLQKLYFQRLSQPGCDGE---N  
XP\_027300205.1 281 YLLPEASIIVTTARPSAVRRIPGKYVGRYAEICGFSDTNLQKLYFQRLSQPGCDGE----  
XP\_013042726.1 253 YLLPEASIIVTTTRPSAVRRIPGKYVGRYAEICGFSDTNLQKLYFQRLSQPGCGGG---D  
NP\_001269072.1 279 YMLPQASIIVTRPSAIGRIPSKYVGRYAEICGFSDTNLQKLYFQRLNQPYCGYAVGGS

XP\_004948095.1 353 SVASRSGEQDNLVEMLSRNLERONQIAAACFLPSYCWLVCCTTLHFIFYFTRTVPPSQTLSG  
XP\_027300205.1 337 ----GSGEQNLVEMLWRNLERONQIAAACFLPSYCWLVCCTTLHFIFYFTRTVPPSQTLTG  
XP\_013042726.1 310 G--EGSGEQDNLVEMLSRNLEHONQIAAACFLPSYCWLVCCTTLHFIFYFTRTVPPSQTLTG  
NP\_001269072.1 339 GVSATPAQRDHLVQMLSRNLEGHQIAAACFLPSYCWLVCATLHFLLHA--PTPAGQTLTS

XP\_004948095.1 413 IYTSFLRLNFSGEVLDSDPTKISMMKYVAKTVGKLAHEGVMSRKTSEEDLQOCFEVE  
XP\_027300205.1 393 IYTSFLRLNFSGEVLDSEPTAVSMMKYVAKTVGKLAHEGVMSRQTCFSEEDLRQCFEVE  
XP\_013042726.1 368 IYTSFLRLNFSGEVLDSDPTDISMMKYVAKTVGKLAHEGVMSRKTCTFSEEDLRQCFEVE  
NP\_001269072.1 397 IYTSFLRLNFSGETLDSDPTSNLSIMAYAAARTMGKLAYEGVSSRKTTFSEEDVCGCLEAG

XP\_004948095.1 473 MKTESELNQEVFRSDVFRFFLTPCVQPGKEHTFVFTIPAMQEYLAALYVVLGEKKTIVQ  
XP\_027300205.1 453 MKTESELNLEEVFRSDVFPFFLTPCVQPGKEHTFVFTIPAMQEYLAALYVVLGEKKTIAQ  
XP\_013042726.1 428 MKTESELNLEEVFRSDVFRFFLTPCVQPGKEHTFVFTIPAMQEYLAALYVVLGEKKTIAQ  
NP\_001269072.1 457 IRTEEFQLIHIFRRDALRFFLAPCVPEPRAGTFVFTIPAMQEYLAALYVVLGLRKTTLQ

XP\_004948095.1 533 KVGKESSELIGKVSEDA AVLSISKVLPLRFLPVLFNLLKIFPRFFSRLSGKGRDRTIAR  
XP\_027300205.1 513 KVGKESSELIGKVSEDA AVLVGIVSKVLPLRFLPVLFNLLKIFPRFFSRLSGKDRDRTIAR  
XP\_013042726.1 488 KVGKESSELIGKVSEDA AVLVGIVSKVLPLRFLPVLFNLLKIFPRFFSRLSGKDRDRTIAR  
NP\_001269072.1 517 KVGKESSELIGKVSEDA AVLVGIVSKVLPLRFLPVLFNLLKIFPRFFSRLSGKDRDRTIAR

XP\_004948095.1 593 TMAEELFKEEDYNDVLDQINSSILGVEGPMRHPDEADDEVFELFPIFMGGLSRRNR  
XP\_027300205.1 573 TMAEELFKEEDYNDVLDQINSSILGVEGPRRHPDEAPDEVFELFPIFMGGLSRRNR  
XP\_013042726.1 548 TMAEELFKEEDYNDVLDQINSSILGVEGPMRHPDEAPDEVFELFPIFMGGLSRRNR  
NP\_001269072.1 577 AMVLEMFREEDYNDVLDQMGASILGVEGPRRHPDEAPDEVFELFPIFMGGLSAHNR

XP\_004948095.1 653 AILEQLGCSIKNLAAFEIAKAMKKT VIRNSRKGLPPSELMDYLFFLHEFQNERFTA EAVR  
XP\_027300205.1 633 AILEQLGCSIKNLAAFEIAEAMKKT VIRNSRKGLPPSELMDYLFFLHEFQNERFTA EAVR  
XP\_013042726.1 608 AILEQLGCSIKNLAAFEIAEAMKKT VIRNSRKGLPPSELMDYLFFLHEFQNERFTA EAVR  
NP\_001269072.1 637 AVLAQLGCPIKNLDALENAQA KKKGLGRQVLPSELIDHLFFHYEFQNERFTA EAVR

XP\_004948095.1 713 SLRTVNLSSVKI TPLKCCVLASV MGS TS HEVEE LNLTSCNLDAS SLRTLFPVLLRCKE FLH  
XP\_027300205.1 693 SLRTVNLSSVKI TPLKCSVLASV IGAACHEVDELNLTSCNLDAAASLRTLFPVLLRCKVLH  
XP\_013042726.1 668 SLRTVNLSSVKI TPLKCSVLASV MGAACHEVDELNLTSCNLDAG SLRTLFPVLLRCKVLO  
NP\_001269072.1 697 SLRQINLAGV RMTPKCIVAAV IGS RHAIDENLASCOLDPAGLRITLIPVFLRARKLG

XP\_004948095.1 773 LQNSLGP DACKELRDLLLHDKCAVSNLRLGNNP IGEQGAQYLAEALAGNRSLSIHLSSLH  
XP\_027300205.1 753 LQNSLGP DACKELRALLLHAKCAVSDLRLSNNP IGEQGARHLAEALAGNRSLSRISLH  
XP\_013042726.1 728 XVPLLLPLGSAQGLGS---PRLCR-GTERAGKGRNALSILRAVPE DYSARRRS SPRSLH  
NP\_001269072.1 757 LQNSLGP DACKELRDLLLHDKCAVSNLRLGNNP IGEQGAQYLAEALAGNRSLSIHLSSLH

XP\_004948095.1 833 TALGDRGVEELAAQH LAENQQLQELNLGYNLTD TAALRVVEVAKKHATLDKVHLYFNDIS  
XP\_027300205.1 813 AALGDRGAEELARRLPENQQLQELNLGYNLTDASALRVVEVAKKHATLDKVHLYFNDIS  
XP\_013042726.1 784 AALGDRGVEELARRLPENQQLQELNLGYNLTDAAALRVVEVAKKHATLDKVHLYFNDIS  
NP\_001269072.1 817 TGLGDEGLEELAAQLDRNRQLQELNVAYNGAGDTAALARRAREHPSLELHLYFNELIS

XP\_004948095.1 893 EDGKRALDSL RMDR-DGVRALVFLTAGTDVSDYSSILNVVHNLFPWDRERVRQHLLTI  
XP\_027300205.1 873 EEGKRALHSLRMER-DGVRALVFLTAGTDVSDYSSILNLSITVORNLPWDRERVRQHLLALL  
XP\_013042726.1 844 EEGKRALHSLRMDR-DGVRALVFLTAGTDVSDYSSILNITVHRNLPWDRERVRQHLLALL  
NP\_001269072.1 877 SEGRQVLRDLGGAAEGGARV VSLTEGTAVSEYWSVITSEVQRNLNSWDRARVQRHLELL

XP\_004948095.1 952 LQDLESSRROTGNPWRKAKFLRVESEVKMLGKLOHGTL  
XP\_027300205.1 932 LQDLESSRROTGNPWRKAKFLRVESEVKRMLAKLQHGTL  
XP\_013042726.1 903 LQDLESSRROTANPWRKAKFLRVESEVKRMLGKLOHGTL  
NP\_001269072.1 937 LRDLED SRGATLNPWRKAQLRVEGEVRAITLEQLGSSGS

**Figure S3:** Schematic alignment of NLRX1 protein sequences of chicken, duck goose and human comprising the N-terminal X domain, NACHT, and the C-terminal LRR. The LC3-interacting region is highlighted in grey.

XP\_025006433.1 1 -----  
XP\_005030015.2 1 MRADRRGNPAGSLLRAFQGGQLQFSCDRSAAATSSRLYHFRDTAGSGFPCPEPALPPEQH  
XP\_013053801.1 1 -----  
AAI43363.1 1 -----

XP\_025006433.1 1 -----MAGEES--TILLEALEGL  
XP\_005030015.2 61 QVPSLHPGAAASPEAGSKEPGRGEASLAHRLEAAAGDFPHPMAGEGSAFTVLLCALEGL  
XP\_013053801.1 1 -----MMAGEGSAFTVLLAAALEGL  
AAI43363.1 1 -----MKM-ASTRCKLARYLEDL

XP\_025006433.1 17 TLEDFQEFKTKLPHHT-DIKGGWNIGRDELEKVTHPSLISYMGDSYGEAAMDIAISLFE  
XP\_005030015.2 121 TLEGFQEFKTKLSHV-HTKRGWNIPEALVEATHPSTLVNCMGKSYGEDAAMDIAIGLFE  
XP\_013053801.1 20 TLEGFQEFKTKLSHV-HTKGGWNIPEAVLVEATHPSTLVNCMGSYGEDAAVDIAIGLFE  
AAI43363.1 18 EDVDLKKFKMHLLEDYPPQKGCIPPRGQTEKADHV-DLATLMIDFNGEKAWAWWIFA

XP\_025006433.1 76 EMNQDLAEKILDEK-----VKEY  
XP\_005030015.2 180 EMNQDLAEKILDEK-----VKEY  
XP\_013053801.1 79 EMNQDLAEKILDEK-----VKEY  
AAI43363.1 77 AINRRDLYEKAKRDEPKWGSNARVSNPTVICQEDSIEEEWMGLLEYLSRISICKMKKLY

XP\_025006433.1 95 KQKYTEHVAREFLQYKEANSCLGENLSVRDRYTNLTIAKSWDQHGDEPGD--V--S---  
XP\_005030015.2 199 KQKYREHVAREFLQYKEVNSCLGENLSVSSRYTALTIITKKPWSQGGGEPGADV--SWGC  
XP\_013053801.1 98 KQKYREHVAREFLRYKEVNSCLGENLSVSSRYTALTIIAKKPWSQSGGEPGADV--SWGC  
AAI43363.1 137 RKKYRKYVRSRFQCIEDRNARLGSVSLNKRYTRLRIRKEHRSQQEREQELLAGKIKTC

XP\_025006433.1 148 ---SDTVTTQTLEPSKDGQVP-PITVLVGASGMGKMTTRKMMVEWEGTLCCT-QFDYV  
XP\_005030015.2 257 ADTTSAVTAQTFLFKPDEEDGQTP-QTVVLVGAPGMGKTMVVRKMMVEWVEGALYM-QFDYV  
XP\_013053801.1 156 ADTTIAVTVQTFLFKPDEEDGQTP-QTVVLVGAPGMGKTMVVRKMMVEWVEGALYM-QFDYV  
AAI43363.1 197 ESPVSPIKMELFLDPDEHSEPVHTVVFOGAAGIGKTIILARKMLLDWASCTLYQDRFDYL

XP\_025006433.1 203 FCIDCKELSF~~S~~KEVSMVDL~~S~~KCCPQOR~~M~~PAGRILGN~~P~~EK~~L~~LFIFDSFEALGLPLAQPKD  
XP\_005030015.2 315 FCIDCKELSL~~S~~KQVSVLDL~~S~~KCCPHQRI~~P~~AGSILDN~~O~~EK~~L~~LFIFDGF~~E~~ALGFPLAQPKD  
XP\_013053801.1 214 FCIDCKELSL~~S~~KQVSVLDL~~S~~KCCPHQRI~~P~~AGSILDN~~O~~EK~~L~~LFIFDGF~~E~~ALGFPLAQPKD  
AAI43363.1 257 FYI~~H~~CRE~~M~~SLV~~T~~Q~~R~~S~~L~~GD~~L~~MS~~C~~CPDPN~~P~~I~~H~~K~~I~~WR~~K~~PS~~R~~LF~~M~~MDGF~~E~~LQ~~G~~AF~~D~~E~~H~~IG

XP\_025006433.1 263 ELSD~~P~~TEAKPLETTLS~~L~~LRRTVLP~~E~~SS~~L~~LIAT~~R~~PAALQS~~L~~GCQ~~E~~LEG~~K~~HYVEILGFS~~P~~A  
XP\_005030015.2 375 ELSSDPREAKPLETTLS~~L~~LRRTVLP~~E~~ASSLLITTR~~P~~VALQNLGR~~C~~LEGE~~C~~YVEILGFS~~A~~A  
XP\_013053801.1 274 ELSSDPREAKPLETTLS~~L~~LRRTVLP~~E~~ASSLLITTR~~P~~VALQNLGR~~C~~LEGE~~C~~YVEILGFS~~A~~A  
AAI43363.1 317 PL~~C~~TDWQK~~A~~ERG~~D~~I~~L~~SS~~L~~LR~~K~~KL~~L~~PEASLLITTR~~P~~VALEK~~L~~QH~~L~~L~~D~~HPRH~~V~~EILGFS~~E~~A

XP\_025006433.1 323 AREEYFHRYF~~G~~ND~~S~~KADVAFR~~F~~TRGNEVLYSLCVIP~~M~~SWT~~V~~CTV~~L~~ER~~E~~LYE~~R~~NOLL~~A~~C~~S~~  
XP\_005030015.2 435 AREEYFHRYFK~~N~~DNKADVAFR~~F~~ARGNE~~S~~LYSLCVIP~~I~~MSWT~~C~~TILEQELYK~~K~~NN~~L~~ECS  
XP\_013053801.1 334 AREEYFHRYFK~~N~~DNKADVAFR~~F~~TRGNETLYSLCVIP~~I~~MSWT~~C~~TILEQELYK~~K~~NN~~L~~ECS  
AAI43363.1 377 KR~~K~~EY~~F~~F~~K~~Y~~F~~SD~~E~~AQ~~A~~RA~~A~~F~~S~~LIQ~~E~~NEV~~L~~FT~~M~~C~~F~~I~~P~~L~~V~~C~~W~~I~~V~~CTGL~~K~~Q~~O~~ESG~~K~~S~~L~~AQ~~T~~S

XP\_025006433.1 383 KTT~~T~~Q~~M~~IMFYLSWLMK~~H~~RVSNAW~~N~~LQ~~O~~FLHKLCSLAADGIW~~K~~HKVLFEEKE~~I~~ED~~O~~GL~~N~~Q  
XP\_005030015.2 495 KAT~~T~~W~~M~~GMFYLSWLMK~~C~~RGSNAAQ~~D~~LQ~~O~~FLHKLCSLAADGIW~~K~~HKVLFEEKE~~V~~KDCGLDW  
XP\_013053801.1 394 KAT~~T~~W~~M~~GMFYLSWLMK~~C~~RGSNAAQ~~Y~~LQ~~O~~FL~~R~~LCSLAADGIW~~K~~HKVLFEE~~R~~EIKDCGLDW  
AAI43363.1 437 KT~~T~~T~~A~~V~~Y~~F~~F~~EL~~S~~SL~~L~~Q~~P~~R~~G~~GSQ~~E~~H~~G~~L~~C~~AH~~L~~W~~G~~LCSLAADGIW~~N~~Q~~L~~FEES~~D~~LR~~N~~H~~G~~L~~Q~~K

XP\_025006433.1 443 P~~O~~LLS~~L~~FLNEK~~G~~LEK~~G~~T~~D~~HV~~N~~VYS~~F~~SHLHLQ~~E~~LF~~A~~AMFYV~~L~~ED~~O~~GMVSD~~S~~-----R~~I~~L~~A~~  
XP\_005030015.2 555 P~~D~~LLS~~L~~FLNEK~~S~~LK~~K~~G~~I~~D~~O~~NVYS~~F~~THLHLQ~~E~~FF~~A~~AMFYV~~L~~DD~~E~~ETVSD~~P~~-----E~~A~~L~~K~~  
XP\_013053801.1 454 P~~D~~LLS~~L~~FLNEK~~S~~LK~~K~~G~~V~~D~~O~~GNVYS~~F~~THLHL~~H~~E~~F~~FAAMFYV~~L~~DD~~E~~ETVSD~~P~~-----E~~A~~L~~A~~  
AAI43363.1 497 AD~~-~~MSA~~F~~LR~~M~~NL~~F~~Q~~K~~E~~V~~DC~~K~~F~~Y~~S~~F~~I~~H~~MT~~F~~Q~~E~~FFA~~M~~Y~~L~~EE~~B~~K~~E~~GR~~N~~V~~P~~GS~~R~~L~~K~~L~~P~~S

XP\_025006433.1 498 K~~D~~V~~N~~M~~L~~LESY~~H~~TSR~~M~~D~~-~~L~~N~~V~~T~~R~~L~~FL~~F~~GLV~~N~~PKS~~E~~YAGE~~G~~IG~~C~~RIS~~L~~Q~~P~~ED~~L~~L~~R~~WL~~Q~~TR  
XP\_005030015.2 610 K~~N~~V~~N~~T~~L~~LESYS~~K~~SR~~K~~D~~-~~L~~N~~L~~T~~R~~F~~L~~F~~GLV~~N~~PKS~~I~~EYAGE~~R~~IG~~C~~RIS~~P~~RA~~O~~ED~~L~~L~~R~~WL~~Q~~TR  
XP\_013053801.1 509 K~~N~~V~~N~~T~~L~~LESYS~~K~~SR~~K~~D~~-~~L~~N~~L~~T~~R~~F~~L~~F~~GLV~~N~~PKS~~I~~EYAGE~~R~~IG~~C~~RIS~~P~~RA~~R~~ED~~L~~L~~R~~WL~~Q~~TR  
AAI43363.1 556 R~~D~~V~~T~~V~~L~~LEN~~Y~~G~~K~~F~~E~~K~~Y~~L~~I~~F~~V~~R~~F~~L~~F~~GLV~~N~~Q~~E~~R~~T~~S~~Y~~LE~~K~~K~~L~~S~~C~~K~~I~~S~~Q~~Q~~I~~R~~L~~E~~L~~L~~L~~W~~E~~V~~K~~

XP\_025006433.1 557 PRGTSHPREVMKLELDLDTFHLLFETNEKSFVQS VLGSFTGIALQD KLTLYDQAAALCFCI  
XP\_005030015.2 669 HRGLSHPSEALMIKDLDTFHFLFEMNEKSFQNVLGCFGTGIDLHDIKLTLYDQMALCFCI  
XP\_013053801.1 568 YRGLSHRSEVMMIKLELDLDTFHFLFEMNEKSFQNVLGCFGTGIDLHDIKLTLYDQMALCFCI  
AAI43363.1 616 AKAKK---LQIQPSQLFLFYCLFEMQEDFVQRAMDYFPKLEINL--STRMDHVMVSSFCI

XP\_025006433.1 617 KQWAGLISVTLRSCSFHQQHRQEPAKGLPROSW-----  
XP\_005030015.2 729 KQWDGVDVTLRSCSFHQQCREEPATVLPQHP-----  
XP\_013053801.1 628 KQWDGVDVTLRSCSFHQQCSEEP TTVLPWQHP-----  
AAI43363.1 671 ENCHRVEISLSLGLFLH---NMPKEEEEEKEGRHLDMVQCVPSSSHAACSHGLVNSHLTS

XP\_025006433.1 651 -----RQEELHSP-LHPLCQALGHPGSSLOSRLRLOWCGLTEGDS  
XP\_005030015.2 763 -----RQEELRSP-LHPLCQALGHTGSSLQNLRLRLOWCGLTEGGC  
XP\_013053801.1 662 -----RQEELRSP-LHPLCQALGHAGSSLQNLRLRLOWCGLTEGGC  
AAI43363.1 728 SFCRGLFSVLSTSQSLTELDLSDNSLGDEGMRVLCETLQHPGCNRRRLWLGRCGLSHECC

XP\_025006433.1 689 GALGMLLATLPSLVHLELGDGALGDDGVRMLCAGLRQPGCQLRILRLRYTHLTSACQDL  
XP\_005030015.2 801 EALGTL LATHPSLACLELGDGALGDSGVRLLCTGLRQPGCHLRILRLRYTRLTSACQDL  
XP\_013053801.1 700 KALGTL LATHPSLACLELGDGALGDSGVRLLCAGLRQPGCQLRILRLRYTRLTSACQDL  
AAI43363.1 788 FDSLVLSSNQKLELDELSDNALGDFGRLLCVGLKHLLELKLWLVSCCLTSACQDL

XP\_025006433.1 749 AVALGTS TCLEELDLSFSA-----  
XP\_005030015.2 861 AAVLGTS PHLEELDLSFNT-----  
XP\_013053801.1 760 AAVLGTS PHLEELDLSFNT-----  
AAI43363.1 848 ASVLS TSHSLTRLYGENALGDSGVAILCEKAKNPQC NLQKLG LVNSGLTSVCCSALSSV

XP\_025006433.1 768 -----GLRDDGVKLLCEGLQHSQCQLRVCRLGSCSLTGACCQALVAVLGH  
XP\_005030015.2 880 -----GLRDDGVQLLCEGLRHACQLRVLRLGSCSLTGACCQALATHLGE  
XP\_013053801.1 779 -----GLRDAGVQLLCEGLRHHACQLRVLRLGSCSLMGACCQALATHLGE  
AAI43363.1 908 LSTNQNLTHLYLRGNTLGDKGKLLCEGLLHPDCKLQVLELDNCLTSHCCWDLSLTLTS

XP\_025006433.1 813 SHGLKCLDLSDELGA-GATLLLQHLRHHSCTLQTLGLSTSTLSKDALQELAAALRAKPS  
XP\_005030015.2 925 SCSLSCLDLSDELGA-GAVLLLRLRHPACPLQALGLSVSALNEDALQELVALRAKPS  
XP\_013053801.1 824 NCSLSCLDLSDELGA-GAVLLLRLRHPACPLQALGLSVSALNEDALQELVALRELKPS  
AAI43363.1 968 SQSLRKLSLGNNDLGDLGVMMFCEVLLKQSSCLLQNLGLSEMYFNYTEKSALETLEEKPE

XP\_025006433.1 872 LKITDLEHEAPETGAMAR-----  
XP\_005030015.2 984 LKIGDLEHDTPEGAMSR-----  
XP\_013053801.1 883 LKIGDLEHDTPELVASLQRPAAAMDGSSGWACALCRHGQDDVAYLMPCLHQCLGCVLR  
AAI43363.1 1028 LTVV--FEP-----

XP\_025006433.1 891 -----L-IFQRSVWAGRGAA-----  
XP\_005030015.2 1003 -----L-PFQRGVWEGKGR-----  
XP\_013053801.1 943 WAKEKPSCPLYGGRLOSSKYSVWSADDYLECPIPELAEQLGDGQQDEQGAAGLVLRTPHE  
AAI43363.1 1035 -----

XP\_025006433.1 905 -----VRGR---  
XP\_005030015.2 1016 -----IGVR---  
XP\_013053801.1 1003 SFPPQLWAAFFQEQLADARPLLAWLQEELRRIYGSQWWDVAVVQGIVLASLCIFGLDQQA  
AAI43363.1 1035 -----

XP\_025006433.1 909 -----  
XP\_005030015.2 1020 -----  
XP\_013053801.1 1063 LVRQLQPSLHSHTVPFVALLVTVAAELYRTGVHWQRERRDARAAGGKEDSPAATPVTAEE  
AAI43363.1 1035 -----

XP\_025006433.1 909 -----KGLPSSRAAPPHSRSLC-----  
XP\_005030015.2 1020 -----KTLSSRVAPPSNRNHC-----  
XP\_013053801.1 1123 EGSHHRRGRDRQRQGRLLPG--AAGPAPTSLAGAGTTRLGGANIP  
AAI43363.1 1035 -----SW-----



**Figure S4:** Schematic alignment of NLRP3 protein sequences of chicken, duck goose and human comprising the N-terminal PYD domain, NACHT, and the C-terminal LRR.

XP\_015150161.2 1 MGWWWVQAEVCTAVNNTVLIAPGRRCHGTPM MEEAWISRYRQQLRSISPOFLEEITGYLQ  
XP\_027324583.1 1 ----- MEEAWISRYQKQLVRSISPOFLEEITCHLR  
XP\_013032636.1 1 ----- MEEAWINRYQKQLVRSISPOFLEEITCYLR  
NP\_849172.2 1 ----- MR

XP\_015150161.2 61 RLDLLTVEEAGRAQEASSLPEQVRAVDVLAGKGS HASQTLQSF IETTNSQLYLHITVYE  
XP\_027324583.1 31 RLDLLTAAEEAGRAQEASSLPEQVRAVDVLAGKGSYASQCLQTFIETTNSQLYLHITVYE  
XP\_013032636.1 31 RLDLLTAAEEAGRVEASSLPEQVRAVDVLAGKGSYASQCLQTFIETTNSQLYLHITVYE  
NP\_849172.2 3 KQEVRTCREAGQCHGTGSPAQVKA LNDILLAGKGSQCSQAPQALDRTPDAPLG--PCSND

XP\_015150161.2 121 PMVQKHLESLOS FYGNSLEI-GSLQRLTNLLVEGLTDIQQKEHDILQEMTKGLRNVSK  
XP\_027324583.1 91 PMVQKHLESLOSRYGNGLT-GPVPRLM NLLVEGLTDIQQKEHDILQIETTKGLRNVSK  
XP\_013032636.1 91 PMVQKHLESLOSRYGNGLT-GPQRLTNLLVEGLTDIQQKEHDILQIETTKGLRNVSK  
NP\_849172.2 61 SRIQRHRKALLSKVGGCPFLG GPWHRLASLLVEGLTDIQLEHDFTOVEATRGGGHPAR

XP\_015150161.2 180 SIPLEKFLFLPLSKVSIPPRISVTIGVAGIGKSTLVKLFVGRWTKGLINRDIMFVLPLTFR  
XP\_027324583.1 150 SIPLEKFLFLPLSKVSIPPRISVTIGVAGIGKSTLVKLFVSSWTKGEITRDIMLGLPLTFR  
XP\_013032636.1 150 SIPLEKFLFLPLSKVSIPPRISVTIGVAGIGKSTLVKLFVYSWAKGEINRDIMLVLPLTFR  
NP\_849172.2 121 TVALDRFLFLPLSRVSPPRISITIGVAGMKTTLVRFVRLWAHQVGRDFSLVLPLTFR

XP\_015150161.2 240 ELNTYEKLSAERLIRSSFPHITEPNCISTGAARTLLILDGLDEFKTPLD FSNTVACTDPK  
XP\_027324583.1 210 ELNTYEKLSAERLIRLALPHATEPSCISAGAARVLLILDGLDEFKTPLD FSNTVCTDPK  
XP\_013032636.1 210 ELNTYEKLSAERLIRLAFPHITEPSCISAGAARTLLILDGLDEFKTPLD FSNTVCTDPK  
NP\_849172.2 181 DLNTHEKLCADRLICSVFPHVGEPSLAVAVPARALLILDGLDECRTPLD FSNTVACTDPK

XP\_015150161.2 300 KEIQVDNLITNIIRGNLLQEAS WVTSRPTAASQIPGGLVDRMTEIRGFRA TEMKDFLDQ  
XP\_027324583.1 270 KEIQVDNLITNIIRGNLLQEAS WVTSRPTAASQIPGGLVDRMTEIRGF GAAEMKEFLDQ  
XP\_013032636.1 270 KEIQVDNLITNIIRGNLLQEAS WVTSRPTAASQIPGGLVDRMTEIRGF GAAEMKEFLDQ  
NP\_849172.2 241 KEIPVDHLITNIIRGNLFPFVSWVTSRPSASGQIPGGLVDRMTEIRGFNEEEIKVCLIQ

XP\_015150161.2 360 MFLDNKDLSGQVLHHIKANRSLHIMCTVPGFCRIYGSSIGYYLKNSTGQPQEMTVAPKTL  
XP\_027324583.1 330 MFLDNRDLSQVLHHIKANRSLHIMCTVPSFCRISGSSIGYYLKTSTDQSQEMTAAPKTL  
XP\_013032636.1 330 MFLDNRDLSQVLHHIKANRSLHIMCTVPGFCWISGSSIGYYLKNSTDQSQEMTVVPKTL  
NP\_849172.2 301 MFPEAQALLGWMLSQVQADRALYIMCTVPAFCRLTGMAIHLWRSRTGPQDAELWPPRTL

XP\_015150161.2 420 SEIYSYFFKMALSSDWPERQRETLRIEQAVNNSKKMGSLGRLAFYGLLKRKHVFYEQDM  
XP\_027324583.1 390 SEIYSYFFKMALSSDWPEKQRETLRIEQAVNNSKKI GSLGRLAFYGLLKRKYVFYEQDM  
XP\_013032636.1 390 SEIYSYFFKMTLSCDWPEKQRETLRIEQAVNNSKKIMGSLGRLAFYGLLKRKYVFYEQDM  
NP\_849172.2 361 CEIYSYFFKMAISGEGQEKGRASPRIEQVAHGGRRKMGTLGRLAFHGLLKKYVFYEQDM

XP\_015150161.2 480 KAYGIDLSLLHSSLCRLLLKEDMQSTTAYYFSHLTIQEFLLAIYYYTAAKRAIFDLFT  
XP\_027324583.1 450 KTYGIDLSLLQSSLCRLLLKEE-VQSSTAYYFSHLTIQEFLLAIYYYTAAKRAIFDLFT  
XP\_013032636.1 450 KTYGIDLSLLQSSLCRLLLKEE-MQSSTAYYFSHLTIQEFLLAIYYYTAAKRAIFDLFT  
NP\_849172.2 421 KAEGVDLALLOGAPCSCFLQREETLASSVAYCFTHLSIQEFVAAAYYGAARRAIFDLFT

XP\_015150161.2 539 ESGMSWPKLGFLNHFKSAVQRSLOAEDGQLDIFVRFLSGLLSPOVNOLLSGWLLVKDEHN  
XP\_027324583.1 509 ENGMSWPKLGFLNHFKSAVQRSLOAEDGQLDIFVRFLSGLLSPOVNKLLSGWLLAKDEHN  
XP\_013032636.1 509 ENGMSWPKLGFLNHFKSAVQRSLOAEDGQLDIFVRFLSGLLSPOVNKLLSGWLLAKDEHN  
NP\_849172.2 481 ESGMSWPRLGFLTHFRSAAQRAMQAEDGRLDVFRFLSGLLSPRVNAIAGSLLAQGEHQ

XP\_015150161.2 599 SRSQAISFLQGCLNTNYVISSQTVNTVHCLHEIQHTEIAKAVEEAMKNESLAGMLTPVN  
XP\_027324583.1 569 SRSQAISFLQGCLNTDYVISSRTVNTVHCLQEIQHMEIAKSVEEAMKNESLAGMLTPVN  
XP\_013032636.1 569 SRSQAISFLQGCLNTDYVISSRTVNTVHCLYEIQHMEIAKSVEEAMKNESLAGMLTPVN  
NP\_849172.2 541 AMRIQVAELAQGCLRPDAAVCARAINVHCLHEIQHTEIARSVEEAMESGALLARTGPAH

XP\_015150161.2 659 CSALAYLLQVSDVCVEETNLSNCLTYNICKSLLPQLLFCHSLRLDNNQFKDNVMELLGSM  
XP\_027324583.1 629 CSVLAYLLQVSDVCVEETNLSNCLTYNVCKSLLPQLLFCHNLRLDNNQFKDNVMELLGSM  
XP\_013032636.1 629 CSVLAYLLQVSNVCMEEETNLSNCLTYNVCKSLLPQLLFCHNLRLDNNQFKDNVMELLGSM  
NP\_849172.2 601 RAALAYLLQVSDACAQEFANLSLSLSQGVLOSLPQLLYCRKLRLDNTNQFQDPVMELLGSM

|                |      |                                               |                             |
|----------------|------|-----------------------------------------------|-----------------------------|
| XP_015150161.2 | 719  | LSVKDCQIQRLSLAENQICNKGAKALARSIMVNRSLT         | VLDLRSNSIGPSGAKALADALKK     |
| XP_027324583.1 | 689  | LSVKDCQIQKLSLAENQISNKGAKALARSIMVNRSLM         | VLDLRSNSIGPSGAKALADALKK     |
| XP_013032636.1 | 689  | LSVKDCQIQKLSLAENQISNKGAKALARSIMVNRSLM         | VLDLRSNSIGPSGAKALADALKK     |
| NP_849172.2    | 661  | LSGKDCRIQKLSLAENQISNKGAKALARSIMVNRSLT         | SLDLRGNSIGPSGAKALADALKK     |
| XP_015150161.2 | 779  | NQVLLSLSLQHNVIKEFGAAALAEALLTNRRLLI            | TLHLQKNSIGA HGARKAEALACNCSL |
| XP_027324583.1 | 749  | NQVLLSLSLQHNVIKEDGATFLAEALLTNKLTTLHLQKNSIGA   | QGARKTAEALKRNCSL            |
| XP_013032636.1 | 749  | NQVLLSLSLQHNVIKEDGAAFLAEALLTNKLTTLHLQKNSIGA   | QGARKTAEALKRNCSL            |
| NP_849172.2    | 721  | NRTLTSLSLQGNTRVRRDGARSMAEALASNRRTLSMLHLQKNSIG | PMGAQRMAEALKRNCSL           |
| XP_015150161.2 | 839  | KELMLSSNSVGDNGSVALAEALKVNHSLSLQSLDLOSNSIS     | NTGVSAALTAALCSNKGLTDLN      |
| XP_027324583.1 | 809  | KELMLSSNSVGDNGSVALAEALKVNHSLSLQSLDLOSNSIS     | SAGVAALTAALCSNKGLVNLN       |
| XP_013032636.1 | 809  | KELMLSSNSVGDNGSVALAEALKVNHSLSLQSLDLOSNSIS     | SAGVAALTAALCSNKGLVNLN       |
| NP_849172.2    | 781  | KELMFSSNSIGDGGAKALAEALKVNOGLESLDLOSNSIS       | DAGVAALMGCALCINQTLTSL       |
| XP_015150161.2 | 899  | LENSISKEGGPAIARALRTNCTLRKLDLAANLH             | DEGGKAIAMKENRALTSLHLOWN     |
| XP_027324583.1 | 869  | LENSISKEGGPAIARALRTNNTLRRDLAANLH              | DEGGKAIAMKENRALTSLHLOWN     |
| XP_013032636.1 | 869  | LENSISKEGGPAIARALRTNSTLRRDLAANLH              | DEGGKAIAMKENRALTSLHLOWN     |
| NP_849172.2    | 841  | LENSISPEGAQAIARALCANSTLKNLDLTANLH             | DQARAIAMAVRENRTLTSLHLOWN    |
| XP_015150161.2 | 959  | FIQTQAAVALAQALQSNDLSLASLDLQENAIGDEGMAAL       | SAALKVNTTLADLHLQVASISA      |
| XP_027324583.1 | 929  | FIQANAATAAQALKSNSLSLASLDLQENAIGDEGMAAL        | SAALKVNTTLADLHLQVASIGA      |
| XP_013032636.1 | 929  | FIQANAATAAQALKSNSLSLASLDLQENAIGDEGMAAL        | SAALKVNTTLADLHLQVASVGA      |
| NP_849172.2    | 901  | FIQAGAAQALQALQLNRSLTSLDLQENAIGDGGACAM         | ARALKVNTALTAALYLOVASIGA     |
| XP_015150161.2 | 1019 | AGAQALAEALMVNNSLQVLDLRGNSISVAGAKAMANALKVNRS   | LRRLNLQENSLGMDGAI           |
| XP_027324583.1 | 989  | AGAQALAEALMVNKSQVLDLRGNSIGVAGAKAMANALKVNRS    | LRRLNLQENSLGMDGAI           |
| XP_013032636.1 | 989  | AGAQALAEALMVNKSQVLDLRGNFIVAGAKAMANALKVNRS     | LRRLNLQENSLGMDGAI           |
| NP_849172.2    | 961  | SGAQVLEALAVNRRTLEIILDRGNAIGVAGAKAMANALKVNS    | LRRLNLQENSLGMDGAI           |
| XP_015150161.2 | 1079 | CIATALRGNHGLTYVNLQGNRIGQSGAKMISDAIRTNS        | SPDCVVVV                    |
| XP_027324583.1 | 1049 | CIATALKGNHGLTYVNLQGNRIGQSGAKMISDAIRTNA        | PDCIVEV                     |
| XP_013032636.1 | 1049 | CIATALKGNHGLTYVNLQGNRIGQSGAKMISDAIRTNS        | SPDCVVEV                    |
| NP_849172.2    | 1021 | CIATALSNGHRLQHNINLQGNHIGD SGAR MISDAITNA      | PCTVEM                      |

**Figure S5:** Schematic alignment of NLRC3 protein sequences of chicken, duck goose and human comprising the N-terminal CARD domain, NBD, and the C-terminal LRR.

NP\_001305364.1 1 MQPTLQNDDFNLEGAASIRPQVLEFLSHRLDWLLASQHFLEPTAVLSGLAGTDHREKV  
XP\_012955436.2 1 MQPLLQNDLNLLEVATASIRPQVLEFLSHHQDWLLTTSQHFLEPGATLRDLGITDHREKV  
XP\_013032006.1 1 MQPLLQNDLNLSEAAATASIRPQVLEFLSHHQDWLLTTSQHFLEPGATLRGLDGITDRREKV  
NP\_115582.4 1 MDPV-----GLQLGNKNWSCLVRLIKDPWLNAKMKFFLPNTDLDSRNETLDPEQRV

NP\_001305364.1 61 SVLLDLLEKAGHATWKQFAOCLCMECDLPLEMEILLMSSAGEGNLSQKQEAQTDAASDQS  
XP\_012955436.2 61 SELLDLLEKDGPDWKQFVQHLCMEIDLPLELEILLMSSAEEGNLSQKQEARIDVARS  
XP\_013032006.1 61 SELLDLLEKAGPATWKQFAOCLCMECDLPLELEILLMSSAGEGNLSQKQEARIDASAWS  
NP\_115582.4 55 ILQLNKLHVQGSDFWQSFVHCVMQLEVPLELEVLLSIFCYDDGFSQLGAEGKSQPE

NP\_001305364.1 120 SVPRGLT<sup>RRRR</sup>SS-SPI<sup>SDK</sup>GA<sup>K</sup>KR<sup>L</sup>DSA<sup>E</sup>KY<sup>Q</sup>ORLLVDSICKRYGSRRAGAAAQEP<sup>T</sup>Q  
XP\_012955436.2 120 SVPKGV<sup>RRRR</sup>SS-SAI<sup>SDK</sup>DA<sup>K</sup>KR<sup>L</sup>DSA<sup>A</sup>NYR<sup>H</sup>LLIDIVRQRYGSRRAGAAAQEQ<sup>M</sup>Q  
XP\_013032006.1 120 SVPKGF<sup>RRRR</sup>SS-SSIS<sup>DK</sup>DA<sup>K</sup>KR<sup>L</sup>DSA<sup>E</sup>NYR<sup>R</sup>LLIDIVRQRYGSRRAGAAAQEQ<sup>M</sup>Q  
NP\_115582.4 115 QLHHGL<sup>K</sup>RPHQSCGSS<sup>RRK</sup>QCKKQOLELAKKYLOLLRTSAQQRYSQIPG-----SQQ

NP\_001305364.1 179 PLAFSQAFVNLVIRQSKASRLKERTDKPREDPSAPEPEECVDTAMRVSDLFGSVVRS<sup>G</sup>T  
XP\_012955436.2 179 PLAFNQAFVNLVIRQSKASRLKERTDKPREDLPSAPEPEECVDTAMRVSDL<sup>F</sup>SSAVRS<sup>G</sup>T  
XP\_013032006.1 179 PLAFNQAFVNLVIRQSKASRLKERTDKPREDLPSAPEPEECVDTAMRVSDLFGSVVRS<sup>G</sup>T  
NP\_115582.4 169 PHAFHQVVPPI<sup>RR</sup>RATAS-----LDTPEGAMGDVKVEDGADV--SISDL<sup>E</sup>N<sup>R</sup>VNK<sup>G</sup>P

NP\_001305364.1 239 TKVIFLFGKPGTGK<sup>T</sup>MLMHRICQKWAEGVLHQFLFTFLFEFRQNL<sup>L</sup>LKRKLT<sup>L</sup>LKELL<sup>F</sup>DL  
XP\_012955436.2 239 TKVIFLFGKPGTGK<sup>T</sup>MLMHRICQKWAEGVLHQFLFTFLFEFRQNL<sup>L</sup>LKRKLT<sup>L</sup>LKELL<sup>F</sup>DL  
XP\_013032006.1 239 TKVIFLFGKPGTGK<sup>T</sup>MLMHRICQKWAEGVLHQFLFTFLFEFRQNL<sup>L</sup>LKRKLT<sup>L</sup>LKELL<sup>F</sup>DL  
NP\_115582.4 222 -RVTVLLG<sup>K</sup>AM<sup>G</sup>K<sup>T</sup>TLA<sup>H</sup>RICQKWAEGHLNCFQALFLFEFRQNL<sup>L</sup>TRFLTPSELL<sup>F</sup>DL

NP\_001305364.1 299 FLQPE<sup>D</sup>SPDAVFQHLLENAQR<sup>T</sup>LIIFDGLDEFVGN<sup>M</sup>DMSSASKGSLNRS<sup>S</sup>MSISEL<sup>F</sup>FAE  
XP\_012955436.2 299 FLQPEES<sup>D</sup>SPDAVFQHLLENAQHTLIIFDGLDEFTGSMD<sup>S</sup>SSTSK<sup>E</sup>GGPTLPS<sup>S</sup>MSISEL<sup>F</sup>FAD  
XP\_013032006.1 299 FLQPAES<sup>D</sup>SPDAVFQHLLENAQHTLIIFDGLDEFTGSMD<sup>S</sup>SSTSK<sup>G</sup>GGPTLPS<sup>S</sup>MSISEL<sup>F</sup>FAD  
NP\_115582.4 281 YLSPESD<sup>H</sup>DTVFOYLEKNADQV<sup>L</sup>LIIFDGLDE<sup>A</sup>LQPMGP-----DGP<sup>G</sup>--P<sup>V</sup>LT<sup>L</sup>FSH

NP\_001305364.1 359 LCHGNLLPGCTVLVTSRPKR PDFL NTVDLAEVWGFDEKVEEYVSHYFRHHSFKEQA  
XP\_012955436.2 359 LCHGKLLPGCTVLVTSRPKRLPDFLLNTVDVLAEVWGFDEKVEEYVSHYFHHHSFKEQA  
XP\_013032006.1 359 LCHGKLLPGCTVLVTSRPKRLPDFLLNTVDVLAEVWGFDEKVEEYVSHYFHHHSFKEQA  
NP\_115582.4 331 LCNGTLLPGCRVMAVTSRPGKLPACLPAE-AAVHMLGFDGPRVEEYVNHFFSAQPSREGA

---

NP\_001305364.1 419 LAHLKNNTKLLSMCQIPALCYVVCICLEYLLLKHO--TSVELPQTMTQFYIKMLLIFINK  
XP\_012955436.2 419 LAHLKNNTKLLSMCLIPALCYVVCICLEYLLLKHO--MSVELPQTMTQFYIKMLLIFINK  
XP\_013032006.1 419 LAHLKNNTKLLSMCLIPALCYVVCICLEYLLLKHO--MSVELPQTMTQFYIKMLLIFINK  
NP\_115582.4 390 LVELQTNGRILRSICAVPALCOVACILHHLIPDHAPGQSVALLPNMTQLYMOMLALSPP

---

NP\_001305364.1 477 QQGEHAGDEEAQLNSNKKAILGLCDLALKGLEAKKLVFYVGDIPHEVKEFASLHGLLTVE  
XP\_012955436.2 477 QQGEHAVDEETQLNCNKKAILGLCDLALKGLEDKLVFYVSDIPELVKEFASLHGLLTVE  
XP\_013032006.1 477 QQGEHAVDEETQLNCNKKAILGLCDLALKGLEDKLVFYVSDIPEHVKEFASLHGLLTVE  
NP\_115582.4 450 -----GH--LPTSSLDLGEVALRGLGTGKVIIFYAKDIAPP IAFGATHSLLTSE

---

NP\_001305364.1 537 EVKTNNSAHPETGYAFVHLSLQEFFAALCLMISKSVDKSHLKRKLSLKSKWTLRNEAKTEF  
XP\_012955436.2 537 EVKTSGTHPEAGYAFVHLSLQEFFAALCLMINKRVDKSYLKKKFSLKSKWTLRNEAKTEF  
XP\_013032006.1 537 EVKTSGTHPEAGYAFVHLSLQEFFAALCLMINKRVDKSHLKKKFSLKSKWTLRNEAKTEF  
NP\_115582.4 498 CVCTGPGHQQTGYAFTHLSLQEFFAALHLMASPRVNKDTLTQYVILHSRWVORTKARLGL

---

NP\_001305364.1 597 MESFHIFLSGLSSKECRTFMLLAEQSEAWVQDKQDAILOSLKKLAATQLTGPKVIELCH  
XP\_012955436.2 597 IESFHIFLSGLSSKECRTFMLLAEQNEAWVQDKQDAILOSLKKLAATHLTGPKVIELCH  
XP\_013032006.1 597 IESFHIFLSGLSSKECRTFMLLAEQNEAWVQDKQDAILOSLKKLAATHLTGPKVIELCH  
NP\_115582.4 558 SDHLPTFLAGLASCTCRPFLSHLAQGNEDCVGAKQAAVQVLLKKLATRKLTGPKVIELCH

---

NP\_001305364.1 657 CTFETQGLEVAQHIGSLLNFKYEFKNFRLTPLDMSALVFVINSQDVTHLDFAGCPLETD  
XP\_012955436.2 657 CTFETQDLKVAQHIGSLLNFKYEFKNFRLTPLDMSALVFVINSQDLTHLDFAGCLMDAG  
XP\_013032006.1 657 CTFETQDLKVAQHIGSLLNFKYEFKNFRLTPLDMSALVFVINSQDLTHLDFAGCLMDAG  
NP\_115582.4 618 CVDETQPELHSLTAQSLPQPLPHNPLTCTD IATLNTIEHREAPIHLDFDGCPLPH

NP\_001305364.1 717 CLEVLASCKNVEHLSFRSRRFGDDFAAALSKGLGEMGSLKKLEVTGGSIITAAGLTDVQA  
XP\_012955436.2 717 CLEVLASCKNVEHLSFRSRRFGDDFAAALSKSLREMGSLKKLELTGGNITAEGLTNLVQA  
XP\_013032006.1 717 CLEVLASCKNVEHLSFRSRRFGDDFAAALSKSLREMGSLKKLELTGGNITAEGLTNLVQA  
NP\_115582.4 678 CPEALVGCQIENLSFKSRKCGDAFAEALSRSLSPTMGRLOMLGLAGSKITARGISHLVKA

---

NP\_001305364.1 777 LSHCLQLEEINLQDNRIQNPDVKTVMELFSRMEKLLKIDLSKNSLSLNAVLILAKEFTAC  
XP\_012955436.2 777 SSQCLQLEEINLQDNRIQDLEVKRVLDFFSRMEKLLKIDLSNNLSLNAVLILAKEVITC  
XP\_013032006.1 777 SSQCLQLEEINLQDNRIQDLEVKRVLDFFSRMEKLLKIDLSNNLSLNAVLILAKEVITC  
NP\_115582.4 738 LPLCPQLKEVSRFDNQLSDQVVLNIVEVLPHPRLRKLIDLSNSICVSTLCLARVAITC

---

NP\_001305364.1 837 QNAAEHLVHRKDTVIIISFS---GPSGKVPRLDLKREONKECVTPTRHLKLCLOARCLSSQ  
XP\_012955436.2 837 QNATELHVRKDIVIINFS---GTSGKVORSLDLRWEENKECVIPTRHVKLCLODRGLSLO  
XP\_013032006.1 837 QNATELHVRKDTVIIISFS---GTSGKVPRLDLRWEENKECVIPTRHVKLCLODRCSLSLO  
NP\_115582.4 798 PTVRMLQAREADLIFLLSPPETTAEIQRAPDLOESDQQRKGAOSRSLTTRLOKCOLQVH

---

NP\_001305364.1 894 HAKEIVSILQSCPHLSEVDLSDNKLGDEGCSFLEENLSWISISKQLNLSHNLLSVTGIYS  
XP\_012955436.2 894 HAKEIVSILQSCPHLSEVDLSGNKLGDEGCSCLLESIPWISISKQLDLSHNLLSINGIYS  
XP\_013032006.1 894 HAKEIVSILQSCPHLSEVDLSGNKLGDEGCSCLLESIPWISISKQLDLSHNLLSINGIYS  
NP\_115582.4 858 DAEALIAALQEGPHLEEVLDLSGNQLEDEGCRMAEAASQIHTARKLDLSNNGLSVAGVHC

---

NP\_001305364.1 954 LLKAVNTCQRVVEVVSLYHNTAVLRFTEDEGFASPPASREEPYPTDDQWDDKENQTPV  
XP\_012955436.2 954 LLKSVNTCQKTMVEVVSLSCHKTAVLRFTEDEGFASP--HREEPLYPTDDQVGEKQTP  
XP\_013032006.1 954 LLKSVNTCQKTMVEVVSLSCHKTAVLRFTEDEGFASPP--HREEPLYPTDDQVGEKQTP  
NP\_115582.4 918 VLRVAVSACWTLAEHHSLSQHKTVIFMFAQPEEQKGPQERAAF---LDSLMLQMPSELPL

---

NP\_001305364.1 1014 PSKKIRLTYCRFQASDLEKLCVAVLKECGSIS--ELDLSNNYLGDEGLAQILQFLPNLKITL  
XP\_012955436.2 1012 LSKKIRLTDYCFQASDLEKLCVAVLKECSSIS--ELDLSNNSLGDEGLSRLFQFLPNLKML  
XP\_013032006.1 1013 LSKKIRLTDCHFQASDLEKLCVAVLQECSSIS--ELDLSNNSLGDEGLSRLFQFLPNLKML  
NP\_115582.4 975 SSRRMRLTHCGLQEKHLEQLCKALGGSCHGHHLHDFSGNALGDEGAARLAQLLPGLGAL

---



NP\_001305364.1 1072 RSLKLNINHSLSVSVFCLAQSLCTLEHETMDLSLGRMQVVHLTFGRIRLR-RTSRWRR  
XP\_012955436.2 1070 RSLKLDNNRISLNSVSVFCLAQSLSTLERIKTMNLSLGHMQVVHLTFWERIRDR-STGRLLR  
XP\_013032006.1 1071 RSLKLDNNRISLNSVSVFCLAQSLSTLEHETKMNLSLGHMQVVHLTFWERIRDR-STGRLLR  
NP\_115582.4 1035 QSLNLSSENGISLDAVLGLVRCFSTLQWIFRIDISFESQHTL-LRGDKTSRDMWATGSL-P

---

NP\_001305364.1 1131 SFLVHPKHVT-----NGOCFRLRNCTGPEDEVTRLCQMLTQCTQLTEIDLGNALNDQSI  
XP\_012955436.2 1129 NFLVHPKHIE-----NGOCFRLRDCTMGPEDEVTRLCQILVHCTQLTEINLSGNPLSDQSI  
XP\_013032006.1 1130 NFLVHPKHIA-----NGRCFRLRDCTMGPEDEVTRLCQILAHCTQLTEIDLSGNPLSDQSI  
NP\_115582.4 1093 DFPAAAKFLGFRQRCIPRSLCLSECPTEPPSITRLCATLKDCPGPLEQLSCEFSLSDQSL

---

NP\_001305364.1 1186 ERLLSFLPHFCQLTLLSIRNNTFSPCCAVLEANSINLCERIRVEVRSSQNAFLHLRTST  
XP\_012955436.2 1184 ERLLSFLPYLCHLTLLSIKNSTFSPCAILEFTNSIGLCERIRKVEVRSSQNAFLHLGTST  
XP\_013032006.1 1185 ERLLSFLPYLCHLTLLSIKNSTFSPCTILEFTNSIGLSERIRKVEVRSSQNAFLHLGTS  
NP\_115582.4 1153 ETLLDCLPQLPOLSLLOLSQTLGSPKSPFLLANITSLCPRVKKVDIIRSLHHAHLHFRSNE

---

NP\_001305364.1 1246 QSQKTSC-RLTDCAIGQRQIEKLCRVLEQHGCLAEIDLSRNQLGDEVLRFLLDHLHRVPV  
XP\_012955436.2 1244 HSQKTSC-SLTDCAISQGOIEELCGVLEQHGRLAEVDLSRNQLGDEGLRFLLDHLHRVHV  
XP\_013032006.1 1245 RSQKTSC-RLTDCAISQGOIEELCRVLEQHGRLAEVDLSRNQLGDEGLRFLLDHLHRVHV  
NP\_115582.4 1213 EEGVCCGRFTIGCSLSQEHVESLQWILSKCKDLSQVDLSANLLGDSGLRCLLECLPOVPI

---

NP\_001305364.1 1305 TCSSLNLSHNRIQRGVHLHLINTEFTSGNTEVQVSLCSKATLLIKMITSRDDPRKILRLTE  
XP\_012955436.2 1303 TCSSLNLSHNRIQDGVHLHLINAFATSGNVTEVQVSLCSKATLLMELTSRDDPRKILSLTE  
XP\_013032006.1 1304 TCSSLNLSHNRIQDGVHLHLINAFATSRNTEVQVSLCSKATLLIKLTSRDDPRKILSLTE  
NP\_115582.4 1273 SGLLDLSHNSISQESALYLLETLPSCPRVREASVNLGSEQSFRHFSREDQAGKTLRLSE

---

NP\_001305364.1 1365 CSFQPEHLEKLCVLENCINLTECISNNNTVDAAGGLRSLSKTPGPKISIEEPWVC  
XP\_012955436.2 1363 CNFQAEHLEKLLWLVLEKCTSLTEYISSNNLTVHAAERLLHSLRKTSGPLKISIEEPWVC  
XP\_013032006.1 1364 CNFQPEHLEKLLWLALEKCTSLTEYISSNNLTVHAAERLLHSLRKTSGPLKISIEEPWVC  
NP\_115582.4 1333 CSFRPEHVSRLATGLSKSLQLTELTLLTCCCLGQQLAIIISLVGRPAGLFSRVQEPWAD

---

NP\_001305364.1 1425 KLSVTS LLELAVQAHGNITAIMICK KNLFLQGVRLPHCLEKVGSVVSRNLNHEPEIKQA  
XP\_012955436.2 1423 KKSVMN LLELAVQACGNITAITICKDKSLFQLGVSFPCCLEKVESVVSRNLNHEPEIKRA  
XP\_013032006.1 1424 KKSVTN LLELAVQACGNITAIMICKDKSLFQLGVRFPCCLEKVESVVSRSNLNHEPEIKRA  
NP\_115582.4 1393 RARVLS LLELCAQASGSVTEISISETQQQLCVQLEFPFQENPEAVLRLAHCDLGAHHS

---

NP\_001305364.1 1485 CFYQRVHDKCTQLQELRWSHVELHDD----TEMLVSI LLPLPDLKKFELTSCSFTPTGID  
XP\_012955436.2 1483 CFYQRVLEKCIQLQELRWSHVELHDDD---TKILV VLLPLPKLKKFELTSCSIMPTGID  
XP\_013032006.1 1484 CFYQRVLEKCIQLQELRWSHVELHDDD---TKILV VLLPLPKLKKFELTSCSIMPTGID  
NP\_115582.4 1453 LLVGQLMETCARLQQLSLSQVNLCEHDDASSLILQSI LLSLSEKTRFR L TSSCVSTEGLA

---

NP\_001305364.1 1541 CLITGLQRCQAIEELN-----LGHMKLGDAAI PKLVF  
XP\_012955436.2 1540 YLITGLQKRCQAIEELS-----LGHMKLSDAAI PMLVL  
XP\_013032006.1 1541 YLITGLQKRCQAIEELN-----LGHMKLSDAAI PKLVL  
NP\_115582.4 1513 HLASGLGHCHHEELDLSNNQFDEEGTKALMRALEGKWMKRLDLSHLLNSSTALLTH

---

NP\_001305364.1 1573 GLCEMPSLKRLILNHN SIGDDGCSRLAEALSSMHCMEEINLGHNKIGDLGLINIAAVLLE  
XP\_012955436.2 1572 GLCKMPSLKRLILNHN SIGNDGCSRLAEALRNMHCMEEINLAHNKIGDPGLINIATVLE  
XP\_013032006.1 1573 GLCKMPSLKRLILNHN SIGDDGCSRLAEALRNMHCMEEINLAHNKIGDPGLINIATVLE  
NP\_115582.4 1573 RLSQMTCLQSLRLNRNSIGDVGCCHLSEALRAATSLEE DLSHNQIGDAGVQHATLPG

---

NP\_001305364.1 1633 MQNLKRIDLSGNCPSPAGEKLMEALANCKHHEELLSRNDFGDGTAVKLALCLPHNRL  
XP\_012955436.2 1632 MQNLKRINLSGNSPSPPTGGEKLMEALACCKHHEELLSRNVFGDGVAVKLALCLPHVSSL  
XP\_013032006.1 1633 MQNLKRINLSGNSPSPPAGEKLMEALAYCKHHEELLSRNVFGDGTAVKLALCLPHVSSL  
NP\_115582.4 1633 LPELRKIDLSGNSISSAGGVQLAESLVLCRRIEELVLCNALGDPTALGLAQELPQ--HL

---

NP\_001305364.1 1693 KILHLQHNNIGPAGGTELARALMACELLEISLSENNLGEGGIHALSEGLPRFEHLRKIE  
XP\_012955436.2 1692 KILHLQKNNIGPTGGTELARALVACRLLEEISLSENDLGEYSIHALSEGLPRLEHLRKID  
XP\_013032006.1 1693 KILHLQKNNIGPTGGTELARALVCGLLEEISLSENDLGEYSIHALSEGLPHLEHLRKID  
NP\_115582.4 1691 RVLHLPFSHLGPGGALS LAQALDCSPHLEEISLAENNLAGGVLRFCME-LP---L LRQID

---

```

NP_001305364.1 1753 LRLCGITDDASKL LSRGFQQCPA EEIILSWNALGDGGAQVLAS I L PGMET LKMLDLEKN
XP_012955436.2 1752 LKLCGITDDSSKSLSCAFQQCPAMEE I ILSWNSLGDGGAQELASALPGMEK LKMLDLEKN
XP_013032006.1 1753 LKLCGITDDSSKSLSCAFQQCPAMEE I ILSWNSLGDGGAQELASALPGMEK LKMLDLEKN
NP_115582.4 1747 LVSCKIDNQIAKLLSSFTSCPAEVI ILSWNLGDEAAAE LAQVLPQMGRLKRV DLEKN

NP_001305364.1 1813 LIGACGATRLAEELVRCPEIQFIRLWDNPVPKGLAES LTSQDPRLCFSFC-----
XP_012955436.2 1812 RIGARGAVKLSSEELVKCPEIQFIRLWNPVPKGLAADLTSQDPRLCFSFY-----
XP_013032006.1 1813 RIGVCGAVKLSQELVKCPEIQFIRLWDNPVPKGLAADLTSQDPRLCFSFY-----
NP_115582.4 1807 QITALGAWLLAEGLAQGSSIQVIRLWNNP I PCDMAQH LKSOE PRLDFAF I DNQPQAPWGT

```

**Figure S6:** Schematic alignment of NLRC5 protein sequences of chicken, duck goose and human comprising the N-terminal CARD domain, NBD, and the C-terminal LRR. NBD and LRR domains were underscored in grey and blue respectively. Putative bipartite NLS and Walker A/B motifs were box highlighted and underscored in red respectively. The residues conforming to bipartite NLS and Walker A/B motif consensus were highlighted in red for human.

NP\_989894.1 1 MAAFSEMGVMPEIAQAVEEMDWLLPTDIAESIPLIILGGGDVLMAAETGSGKTGAFSIPV  
XP\_027311055.1 1 MAAFSEMGVMPEIAQAVEEMDWLLPTDIAESIPLIILGGGDVLMAAETGSGKTGAFSIPV  
XP\_013028107.1 1 MAAFSEMGVMPEIAQAVEEMDWLLPTDIAESIPLIILGGGDVLMAAETGSGKTGAFSIPV  
NP\_004930.1 1 MAAFSEMGVMPEIAQAVEEMDWLLPTDIAESIPLIILGGGDVLMAAETGSGKTGAFSIPV

NP\_989894.1 61 IQIVYETLKDQMEGKKGKATIKTGGAVLNKQWMPYDRGSAFAIGSDGLCCQSREVKWEH  
XP\_027311055.1 61 IQIVYETLKDQMEGKKGKATIKTGGAVLNKQWMPYDRGSAFAIGSDGLCCQSREVKWEH  
XP\_013028107.1 61 IQIVYETLKDQMEGKKGKATIKTGGAVLNKQWMPYDRGSAFAIGSDGLCCQSREVKWEH  
NP\_004930.1 61 IQIVYETLKDQMEGKKGKATIKTGGAVLNKQWMPYDRGSAFAIGSDGLCCQSREVKWEH

NP\_989894.1 121 GCRATRGVTKGKYEEVVSCHDQGLCRVGWSTMQASLDLGTDFGFGFGGTGKKSHNKQFD  
XP\_027311055.1 121 GCRATRGVTKGKYEEVVSCHDQGLCRVGWSTMQASLDLGTDFGFGFGGTGKKSHNKQFD  
XP\_013028107.1 121 GCRATRGVTKGKYEEVVSCHDQGLCRVGWSTMQASLDLGTDFGFGFGGTGKKSHNKQFD  
NP\_004930.1 121 GCRATRGVTKGKYEEVVSCHDQGLCRVGWSTMQASLDLGTDFGFGFGGTGKKSHNKQFD

NP\_989894.1 181 SYGEEFTMHDTIGCYLDIDKGQIKFSKNGKDLGLAFEPHPIRNQALFAACVLKNAELKF  
XP\_027311055.1 181 SYGEEFTMHDTIGCYLDIDKGQIKFSKNGKDLGLAFEPHPIRNQALFAACVLKNAELKF  
XP\_013028107.1 181 SYGEEFTMHDTIGCYLDIDKGQIKFSKNGKDLGLAFEPHPIRNQALFAACVLKNAELKF  
NP\_004930.1 181 NYGEEFTMHDTIGCYLDIDKGQIKFSKNGKDLGLAFEPHPIRNQALFAACVLKNAELKF

NP\_989894.1 241 NFGGEEDFKFPPKDG YIGLCKAPDGNVVKSOHAGNAQVVQTQNLNPNAPKALIVEPSRELAE  
XP\_027311055.1 241 NFGGEEDFKFPPKDG YIGLCKAPDGSVVKSOHAGNAQVVQTQNLNPNAPKALIVEPSRELAE  
XP\_013028107.1 241 NFGGEEDFKFPPKDG YIGLCKAPDGSVVKSOHAGNAQVVQTQNLNPNAPKALIVEPSRELAE  
NP\_004930.1 241 NFGGEEDFKFPPKDG YIGLCKAPDGSVVKSOHAGNAQVVQTQNLNPNAPKALIVEPSRELAE

NP\_989894.1 301 QTLNNVKQFKKYIDNPKLRELLIIGGVAARDQLSVLEQGVDIVVGTGPGRLDDLIVSTGKLN  
XP\_027311055.1 301 QTLNNVKQFKKYIDNPKLRELLIIGGVAARDQLSVLEQGVDIVVGTGPGRLDDLIVSTGKLN  
XP\_013028107.1 301 QTLNNVKQFKKYIDNPKLRELLIIGGVAARDQLSVLEQGVDIVVGTGPGRLDDLIVSTGKLN  
NP\_004930.1 301 QTLNNVKQFKKYIDNPKLRELLIIGGVAARDQLSVLEQGVDIVVGTGPGRLDDLIVSTGKLN

|                |     |                                                                       |
|----------------|-----|-----------------------------------------------------------------------|
| NP_989894.1    | 361 | LSQVRFLVI <b>DEAD</b> GLLSQGYSDFINRHSQIPQITSDGKRLQVIVCSATLHSFDVKKLSE  |
| XP_027311055.1 | 361 | LSQVRFLVI <b>DEAD</b> GLLSQGYSDFINRHSQIPQITSDGKRLQVIVCSATLHSFDVKKLSE  |
| XP_013028107.1 | 361 | LSQVRFLVI <b>DEAD</b> GLLSQGYSDFINRHSQIPQITSDGKRLQVIVCSATLHSFDVKKLSE  |
| NP_004930.1    | 361 | LSQVRFLVI <b>DEAD</b> GLLSQGYSDFINRHSQIPQITSDGKRLQVIVCSATLHSFDVKKLSE  |
|                |     |                                                                       |
| NP_989894.1    | 421 | KIMHFPTWVDLKGEDSVPETVHHVVVTVNPKT <b>DKLWERLGKNHIRTDEVHAKDNTLPGAN</b>  |
| XP_027311055.1 | 421 | KIMHFPTWVDLKGEDSVPETVHHVVVVPVNPKA <b>DKLWERLGKNHIRTDEVHAKDNTRPGAN</b> |
| XP_013028107.1 | 421 | KIMHFPTWVDLKGEDSVPETVHHVVVVPVNPKA <b>DKLWERLGKNHIRTDEVHAKDNTRPGAN</b> |
| NP_004930.1    | 421 | KIMHFPTWVDLKGEDSVPETVHHVVVVPVNPKT <b>DKLWERLGKSHIRTDVHAKDNTRPGAN</b>  |
|                |     |                                                                       |
| NP_989894.1    | 481 | TPEMWSEAIKILKGEYTVRAIKEHKMDQAIIFCRTKIDCDNMEQYFIQQGGGPD <b>DRKGHQF</b> |
| XP_027311055.1 | 481 | TPEMWSEAIKILKGEYTVRAIKEHKMDQAIIFCRTKIDCDNMEQYFIQQGGGPD <b>DRKGHQF</b> |
| XP_013028107.1 | 481 | TPEMWSEAIKILKGEYTVRAIKEHKMDQAIIFCRTKIDCDNMEQYFIQQGGGPD <b>DRKGHQF</b> |
| NP_004930.1    | 481 | SPEMWSEAIKILKGEYTVRAIKEHKMDQAIIFCRTKIDCDNMEQYFIQQGGGPD <b>DRKGHQF</b> |
|                |     |                                                                       |
| NP_989894.1    | 541 | SCVCLHGDRKPQERKQNLERFKRGDVRFLICTDVAARGIDIHGVPYVINVTLPDEKQNYV          |
| XP_027311055.1 | 541 | SCVCLHGDRKPQERKQNLERFKRGDVRFLICTDVAARGIDIHGVPYVINVTLPDEKQNYV          |
| XP_013028107.1 | 541 | SCVCLHGDRKPQERKQNLERFKRGDVRFLICTDVAARGIDIHGVPYVINVTLPDEKQNYV          |
| NP_004930.1    | 541 | SCVCLHGDRKPEERKQNLERFKRGDVRFLICTDVAARGIDIHGVPYVINVTLPDEKQNYV          |
|                |     |                                                                       |
| NP_989894.1    | 601 | HRIGRVGRAERMGLAISLVAKEKEKVVYHVCSSRGKGCYNTRLKEEGGCTI <b>WYNEMQLLG</b>  |
| XP_027311055.1 | 601 | HRIGRVGRAERMGLAISLVAKEKEKVVYHVCSSRGKGCYNTRLKEEGGCTI <b>WYNEMQLLG</b>  |
| XP_013028107.1 | 601 | HRIGRVGRAERMGLAISLVAKEKEKVVYHVCSSRGKGCYNTRLKEEGGCTI <b>WYNEMQLLG</b>  |
| NP_004930.1    | 601 | HRIGRVGRAERMGLAISLVATEKEKVVYHVCSSRGKGCYNTRLKEEGGCTI <b>WYNEMQLLS</b>  |
|                |     |                                                                       |
| NP_989894.1    | 661 | EIEEHLNCTISQVEPDIKVPVDDFDGKVTY <b>GQKRALGGGLYKGHVDILAPTVOELAALEK</b>  |
| XP_027311055.1 | 661 | EIEEHLNCTIAQVEPDIKVPVDDFDGKVTY <b>GQKRALGGGLYKGHVDILAPTVOELAALEK</b>  |
| XP_013028107.1 | 661 | EIEEHLNCTIAQVEPDIKVPVDDFDGKVTY <b>GQKRALGGGLYKGHVDILAPTVOELAALEK</b>  |
| NP_004930.1    | 661 | EIEEHLNCTISQVEPDIKVPVDFDGGKVTY <b>GQKRALGGGSYKGHVDILAPTVOELAALEK</b>  |
|                |     |                                                                       |
| NP_989894.1    | 721 | <b>EAQTSFLHLGYLPNQLFRTE</b>                                           |
| XP_027311055.1 | 721 | <b>EAQTSFLHLGYLPNQLFRTE</b>                                           |
| XP_013028107.1 | 721 | <b>EAQTSFLHLGYLPNQLFRTE</b>                                           |
| NP_004930.1    | 721 | <b>EAQTSFLHLGYLPNQLFRTE</b>                                           |

**Figure S7:** Schematic alignment of DDX1 protein sequences of chicken, duck, goose and human. Depicted are the DEAD box region, and HelicC domain in black, and red underlining respectively. The DEAD box is boxed in blue.

XP\_001232052.1 1 MPEATRI CAGS GAESE-----  
XP\_027316557.1 1 MPEATRI CAGS GAEEA-----  
XP\_013030257.1 1 LEVSRLVCEPSLRAASV-----  
NP\_004719.2 1 MPGKLRSDAGL-ESDTAMKKGETLRKQTEEEKKPKSKDKTEEIAEEEEETVFPKAKQVK

XP\_001232052.1 17 -----PESPMESEAAPES SRRRRKKEKKEKSKRHDKARKRKPQT  
XP\_027316557.1 17 -----S SPMESEAAATANGRRRRKKEKKEKAKRRDKAPKRKSQT  
XP\_013030257.1 18 -----PRGSGDARVGT HAS-VVPOKEKKEKAKRRDKARKRKSQT  
NP\_004719.2 60 KKAEPSEVDMNSPKSKKAKKKEEPSQNDISPKTKSLRKKKEPTKKEK----VVSSKTKKVT

XP\_001232052.1 57 DESEQSEEECS SPKIKKAKTGGKQNGHVREESPENARLSSVSAKSTHKKRH SENSSETSSG  
XP\_027316557.1 57 DESEQSEDELDPKVKKAKSREKQNGDARGESPENARLSSLT LKAAARKKOPSNSSETSSG  
XP\_013030257.1 57 DESEQSEDELDS PKVKKAKSREKQNGDAGG DSPENARLSSLT LKSAHKKRPRNASETSSG  
NP\_004719.2 116 KNEEPSEEEIDAPKPKMKKEKEMNGETREKSPK-----LKNGFPHPEPDCNPSEAASE

XP\_001232052.1 117 DGDSDQEQEMTEEQKEGAFSNFPISKGTIQLLQARGVITYLFPVQVKTFNPVSGKD VIAQ  
XP\_027316557.1 117 DCDSDQEQEMTEEQKEGAFSNFPISKGTVELLQARGVITYLFPVQVKTFHPVSGKD VIAQ  
XP\_013030257.1 117 DCDSDQEQEMTEEQKEGAFSNFPISKVTVELLQARGVITYLFPVQVKTFHPVSGKD VIAQ  
NP\_004719.2 170 ESNSSEIEQEIPVEQKEGAFSNFPISEETKLLKARGVT LFPQAKTFHHVSGKDIAQ

XP\_001232052.1 177 ARTGTGKTFSFAIPLIEKLOADSQERGRSPKVLVLAPTRELANQVAKDFKDI TRKLTV  
XP\_027316557.1 177 ARTGTGKTFSFAIPLIEKLOADSQEKRGRAPKVLVLAPTRELANQVAKDFKDI TRKLTV  
XP\_013030257.1 177 ARTGTGKTFSFAIPLIEKLOADSQERGRSPKVLVLAPTRELANQVAKDFKDI TRKLTV  
NP\_004719.2 230 ARTGTGKTFSFAIPLIEKLHGEIQDRKGRAPQVLVLAPTRELANQVSKDFS DITKLSV

XP\_001232052.1 237 ACFYGGTPYNGQIDLIRSGIDILVGTGPGR IKDHLQNGKLDLTKVKHVVI DEVDQMLDMGF  
XP\_027316557.1 237 ACFYGGTPYNGQIDLIRSGIDILVGTGPGR IKDHLQNGKLDLTKVKHVVI DEVDQMLDMGF  
XP\_013030257.1 237 ACFYGGTPYNGQIDLIRSGIDILVGTGPGR IKDHLQNGKLDLTKVKHVVI DEVDQMLDMGF  
NP\_004719.2 290 ACFYGGTPYGGQFERMRNGIDILVGTGPGR IKDHLQNGKLDLTKVKHVVI DEVDQMLDMGF

XP\_001232052.1 297 AEQVEDILRVAYKKDSEDPQTLLFSATCPHWVYDVAKKYMKSKEYQDLIGKKTOKAAT  
XP\_027316557.1 297 AEQVEDILRVAYKKDSEDPQTLLFSATCPHWVYDVAKKYMKSKEYQDLIGKKTOKAAT  
XP\_013030257.1 297 AEQVEDILRVAYKKDSEDPQTLLFSATCPHWVYDVAKKYMKSKEYQDLIGKKTOKAAT  
NP\_004719.2 350 AEQVEDILRVAYKKDSEDPQTLLFSATCPHWVYDVAKKYMKSKEYQDLIGKKTOKAAT

---

XP\_001232052.1 357 TVEHLAIAECHWSQRAAVIGDVIQVYSGSHGRTIVFCETKKDANELALNASIKQDCQSLHG  
XP\_027316557.1 357 TVEHLAIAECHWSQRAAVIGDVIQVYSGSHGRTIVFCETKKDANELALNASIKQDCQSLHG  
XP\_013030257.1 357 TVEHLAIAECHWSQRAAVIGDVIQVYSGSHGRTIVFCETKKDANELALNASIKQDCQSLHG  
NP\_004719.2 410 TVEHLAIAECHWSQRAAVIGDVIQVYSGSHGRTIVFCETKKDANELALNASIKQDCQSLHG

---

XP\_001232052.1 417 DIPQKQREITLKGFRNGAFKVLVATNVAARGLDIPVDLVVQSSPPKDVESYIHRSGRTG  
XP\_027316557.1 417 DIPQKQREITLKGFRNGAFKVLVATNVAARGLDIPVDLVVQSSPPKDVESYIHRSGRTG  
XP\_013030257.1 417 DIPQKQREITLKGFRNGAFKVLVATNVAARGLDIPVDLVVQSSPPKDVESYIHRSGRTG  
NP\_004719.2 470 DIPQKQREITLKGFRNGAFKVLVATNVAARGLDIPVDLVVQSSPPKDVESYIHRSGRTG

---

XP\_001232052.1 477 RAGRTGICICFYQRKEENQLRYVEQKAGIAFKRVGVPTATDIKASSKDAIRCLDSVPOS  
XP\_027316557.1 477 RAGRTGICICFYQRKEENQLRYVEQKAGIAFKRVGVPTATDIKASSKDAIRCLDSVPOS  
XP\_013030257.1 477 RAGRTGICICFYQRKEENQLRYVEQKAGIAFKRVGVPTATDIKASSKDAIRCLDSVPOS  
NP\_004719.2 530 RAGRTGICICFYQRKEENQLRYVEQKAGIAFKRVGVPTATDIKASSKDAIRCLDSVPOS

---

XP\_001232052.1 537 AIDYFKESAQLLIEKGPVNALAAALAHISGATSIEQRSL----LNSDAGFVTMILRCSE  
XP\_027316557.1 537 AIDYFKESAQLLIEKGPVNALAAALAHISGATSIEQRSL----LNSDAGFVTMILRCSE  
XP\_013030257.1 537 AIDYFKESAQLLIEKGPVNALAAALAHISGATSIEQRSLPXXXLNSDAGFVTMILRCSE  
NP\_004719.2 590 AIDYFKESAQLLIEKGPVNALAAALAHISGATSIEQRSL----LNSDAGFVTMILRCSE

---

XP\_001232052.1 593 EINNMSYAWRRRLREQLGDDVDRKVNRMCFIKGRMGVCFDIPVADQKEIEGKWEDSKQCRL  
XP\_027316557.1 593 EINNMSYAWRRRLREQLGDDVDRKVNRMCFIKGRMGVCFDIPVADQKEIEGKWEDSKQCRL  
XP\_013030257.1 597 EINNMSYAWRRRLREQLGDDVDRKVNRMCFIKGRMGVCFDIPVADQKEIEGKWEDSKQCRL  
NP\_004719.2 646 EINNMSYAWRRRLREQLGDDVDRKVNRMCFIKGRMGVCFDIPVADQKEIEGKWEDSKQCRL

---

|                                                                  |     |                                                             |
|------------------------------------------------------------------|-----|-------------------------------------------------------------|
| XP_001232052.1                                                   | 653 | CVANELPELEESQRGGGGGGGGGGGN-----NRS-----FSGSRNG-RRG-----     |
| XP_027316557.1                                                   | 653 | CVANELPELEESQRGGGG-----GN-----GRS-----FSGSRSGRRG-----       |
| XP_013030257.1                                                   | 657 | CVANELPELEEIQRGGG-----N-----GRS-----FSSSRSG-RRG-----        |
| NP_004719.2                                                      | 706 | SVATEQPELEGPREGYGG-----FRGQREGSRGFRGQRDGNRRFRGQREG-SRCPRGQR |
| <hr style="border: 1px solid red; width: 15%; margin-left: 0;"/> |     |                                                             |
| XP_001232052.1                                                   | 692 | ---GSGRNRFRSRGQKRSYDRAFDR                                   |
| XP_027316557.1                                                   | 687 | ---GSGRNRFRGRGQKRSYDRAFDR                                   |
| XP_013030257.1                                                   | 688 | ---GSGRNRFRSRGQKRSYDRAFDR                                   |
| NP_004719.2                                                      | 759 | SGGGNKSNRSQNKGQKRS-SKAFGQ                                   |

**Figure S8:** Schematic alignment of DDX21 protein sequences of chicken, duck, goose and human. Depicted are DEAD box region, GUCT and HelicC domain in black, green and red underlining respectively. The DEAD box is boxed in blue.



XP\_015147310.1 1 MSYEQRDWDGRGRGRGGDGGSS-----SASSSGGGGH---GCRGGGRGRHP  
XP\_027320349.1 1 MSSEQRRGWARGDGGPAASS-----SSCSSSAGGHGGRGGGGGGGRGRHP  
XP\_013048508.1 1 -----  
NP\_065916.2 1 MSYDYHQNWGRDGGP--RSSGGGYGGGPAGGHGGNRSSGGGGGG---GGGRGGGRGRHP

XP\_015147310.1 43 SHLKGREIGLWYARKQGQSKETDRQQRAVVRMDERREEQIVQLLNNAVQPRAEKEQEA-M  
XP\_027320349.1 47 SHLKGREIGLWYARKQGQSKETDRQQRAVVRMDERREEQIAQLLTAVQSRSEKEPDA-M  
XP\_013048508.1 1 -----MDERREEQIAQLLTAVQSRSEKEPDA-M  
NP\_065916.2 55 GHLKGREIGMWAQKQGQKKEAERQERAVVHMDERREEQIVQLLNNAVQAKNDKESHAQI

XP\_015147310.1 102 SWWSGDEFGHVPEQPPKVKPGAEGAEKAPVKR-----RPILOKTFLDQDVEYLFE  
XP\_027320349.1 106 SWWSGDEEDGNTPEQPAKVKPEVE---KAPIKO-----RPVLEKTFLDRDVEYLFE  
XP\_013048508.1 28 SWWSGDEEDGNTPEQPAKVKPEAE---KAPIKO-----RPVLEKTFLDRDVEYLFE  
NP\_065916.2 115 SWEAPEDHGYGTEVSTKNTPCSEN--KLDIQEKKLINQEKMFRRNRSYIDRDSSEYLLQ

XP\_015147310.1 152 KNDQDADLDEQLKEDLRKKKSDPRYIEMQRFREKLPSYGMQELVNLINNNRVTVISGET  
XP\_027320349.1 153 KNQDQDADLDEQLKEDLRKKKSDPRYIEMQRFREKLPSYGMQELVNLINNNRVTVISGET  
XP\_013048508.1 75 KNQDQDADLDEQLKEDLRKKKSDPRYIEMQRFREKLPSYGMQELVNLINNNRVTVISGET  
NP\_065916.2 173 ENEPDGTLQKLLLEDLQKKKNDLRYIEMQHFREKLPSYGMQELVNLIDNHQVTVISGET

XP\_015147310.1 212 GCGKTTQVTQFILDYIERGKGSTCRIVCTQPRRISASVAERVAEAERAEACGNGKSTGY  
XP\_027320349.1 213 GCGKTTQVTQFILDYIERGKGSTCRIVCTQPRRISASVAERVAEAERAEACGNGKSTGY  
XP\_013048508.1 135 GCGKTTQVTQFILDYIERGKGSTCRIVCTQPRRISASVAERVAEAERAEACGNGKSTGY  
NP\_065916.2 233 GCGKTTQVTQFILDYIERGKGSACRIVCTQPRRISASVAERVAEAERAEACGNGKSTGY

XP\_015147310.1 272 QIRLQSRPRLPRKQGSILYCTTGIVLQWLQSDKHLSSISHVVLDEIHERNLQSDVLMSTIKD  
XP\_027320349.1 273 QIRLQSRPRLPRKQGSILYCTTGIVLQWLQSDKHLSSISHVVLDEIHERNLQSDVLMSTIKD  
XP\_013048508.1 195 QIRLQSRPRLPRKQGSILYCTTGIVLQWLQSDKHLSSISHVVLDEIHERNLQSDVLMSTIKD  
NP\_065916.2 293 QIRLQSRPRLPRKQGSILYCTTGI LQWLQSDPYLSSISHVVLDEIHERNLQSDVLMSTIKD

XP\_015147310.1 332 LLNVRLDLKVI LMSATLNAEKFSEYFDNCPMIHIPGFTFPVVEYLLEDVIEKLRYPENT  
XP\_027320349.1 333 LLNVRLDLKVI LMSATLNAEKFSEYFDNCPMIHIPGFTFPVVEYLLEDVIEKLRYPENT  
XP\_013048508.1 255 LLNVRLDLKVI LMSATLNAEKFSEYFDNCPMIHIPGFTFPVVEYLLEDVIEKLRYPENT  
NP\_065916.2 353 LLNFRS DLKVI LMSATLNAEKFSEYFGNCPMIHIPGFTFPVVEYLLEDVIEKLRYPENK

---

XP\_015147310.1 392 DRRPRWKKGFMQGHISRPEKEEKEEYRERWPEYLRQLRGRYSASTIDALEMMDDDKVDL  
XP\_027320349.1 393 DRRPRWKKGFMQGHISRPEKEEKEEYRERWPEYLRQLRGRYSASTIDALEMMDDDKVDL  
XP\_013048508.1 315 DRRPRWKKGFMQGHISRPEKEEKEEYRERWPEYLRQLRGRYSASTIDALEMMDDDKVDL  
NP\_065916.2 413 EHRSQFKRGFMQGHINRQEKKEEKEAYRERWPEYLRQLRGRYSASTIDALEMMDDDKVDL

---

XP\_015147310.1 452 DLIAALIRHIVLEEDGAILVFLPGWDNISTLHDLMSQVMFKSDFIIIPLSLMPVTN  
XP\_027320349.1 453 DLIAALIRHIVLEEDGAILVFLPGWDNISTLHDLMSQVMFKSDFIIIPLSLMPVTN  
XP\_013048508.1 375 DLIAALIRHIVLEEDGAILVFLPGWDNISTLHDLMSQVMFKSDFIIIPLSLMPVTN  
NP\_065916.2 473 NLIIVALIRYIVLEEDGAILVFLPGWDNISTLHDLMSQVMFKSDFIIIPLSLMPVTN

---

XP\_015147310.1 512 QTQVFKKTPPGVRKIVIATNIAETSITIDDVVFVIDGGKIKETHFDTQNNISTMAAEWWS  
XP\_027320349.1 513 QTQVFKKTPPGVRKIVIATNIAETSITIDDVVFVIDGGKIKETHFDTQNNISTMAAEWWS  
XP\_013048508.1 435 QTQVFKKTPPGVRKIVIATNIAETSITIDDVVFVIDGGKIKETHFDTQNNISTMAAEWWS  
NP\_065916.2 533 QTQVFKRTPPGVRKIVIATNIAETSITIDDVVFVIDGGKIKETHFDTQNNISTMSAEWWS

---

XP\_015147310.1 572 KANAKQRKGRAGRVQPGHCYHLYNGLRASLLDDYQLPEILRTPLEELCLQIKILKLGGA  
XP\_027320349.1 573 KANAKQRKGRAGRVQPGHCYHLYNGLRASLLDDYQLPEILRTPLEELCLQIKILKLGGA  
XP\_013048508.1 495 KANAKQRKGRAGRVQPGHCYHLYNGLRASLLDDYQLPEILRTPLEELCLQIKILKLGGA  
NP\_065916.2 593 KANAKQRKGRAGRVQPGHCYHLYNGLRASLLDDYQLPEILRTPLEELCLQIKILKLGGA

---

XP\_015147310.1 632 YFLSKLMDPPSRDAVMLAINHLMELNALDRQEELTPLGVHLARLPVEPHIGKMILFGALF  
XP\_027320349.1 633 YFLSKLMDPPSRDAVMLAINHLMELNALDRQEELTPLGVHLARLPVEPHIGKMILFGALF  
XP\_013048508.1 555 YFLSKLMDPPSRDAVMLAINHLMELNALDRQEELTPLGVHLARLPVEPHIGKMILFGALF  
NP\_065916.2 653 YFLSR LMDPPSNEAVLSIRHLMELNALDRQEELTPLGVHLARLPVEPHIGKMILFGALF

---

---

|                |     |                                                                                                                                        |
|----------------|-----|----------------------------------------------------------------------------------------------------------------------------------------|
| XP_015147310.1 | 692 | CCLDPVLTIAASLSFKDPFVIPLGKEKVDARRKELSKNTKSDHLTVVNAFTGWEE <sup>TRRR</sup>                                                                |
| XP_027320349.1 | 693 | CCLDPVLTIAASLSFKDPFVIPLGKEKVDARRKELSKNTKSDHLTVVNAFTGWEE <sup>TRRR</sup>                                                                |
| XP_013048508.1 | 615 | CCLDPVLTIAASLSFKDPFVIPLGKEKVDARRKELSKNTKSDHLTVVNAFTGWEE <sup>TRRR</sup>                                                                |
| NP_065916.2    | 713 | CCLDPVLTIAASLSFKDPFVIPLGKEKVDARRKELAKDTSDHLTVVNAFTGWEEARRR                                                                             |
| <hr/>          |     |                                                                                                                                        |
| XP_015147310.1 | 752 | GFRTEKDYCWEYFLSPNTLQMLHNMKGQFAEHL <sup>LL</sup> AGFVNSRDPKDPKSNTNSDNEKLLK                                                              |
| XP_027320349.1 | 753 | GFRTEKDYCWEYFLSSNTLQMLHNMKGQFAEHL <sup>LL</sup> AGFVNSRDPKDPKSNTNSDNEKLLK                                                              |
| XP_013048508.1 | 675 | GFRTEKDYCWEYFLSSNTLQMLHNMKGQFAEHL <sup>LL</sup> AGFVNSRDPKDPKSNTNSDNEKLLK                                                              |
| NP_065916.2    | 773 | GFRTEKDYCWEYFLSSNTLQMLHNMKGQFAEHL <sup>LL</sup> AGFVNSRNPKDPESNTNSDNEKILK                                                              |
| <hr/>          |     |                                                                                                                                        |
| XP_015147310.1 | 812 | AVICAGLYPKVAKIRPSFSKKRKMVKVCTKTDGTVNIHPKSVNVEETEFHYNWL <sup>VYHLKM</sup>                                                               |
| XP_027320349.1 | 813 | AVICAGLYPKVAKIRPSFSKKRKMVKVCTKTDGTVNIHPKSVNVEETEFHYNWL <sup>VYHLKM</sup>                                                               |
| XP_013048508.1 | 735 | AVICAGLYPKVAKIRPSFSKKRKMVKVCTKTDGTVNIHPKSVNVEETEFHYNWL <sup>VYHLKM</sup>                                                               |
| NP_065916.2    | 833 | AVICAGLYPKVAKIRLNLGKKRKMVKVYTKTDGLVAHPKSVNVEQT <sup>EFHYNWL</sup> YHLKM                                                                |
| <hr/>          |     |                                                                                                                                        |
| XP_015147310.1 | 872 | RTSSIIYLYDCTEVSPYCLLFFGGDISIQKDKDQDTIAVDEWIVFQSPART <sup>HLVKNLRQE</sup>                                                               |
| XP_027320349.1 | 873 | RTSSIIYLYDCTEVSPYCLLFFGGDISIQKDKDQDTIAVDEWIVFQSPART <sup>QLVKNLRQE</sup>                                                               |
| XP_013048508.1 | 795 | RTSSIIYLYDCTEVSPYCLLFFGGDISIQKDKDQDTIAVDEWIVFQSPART <sup>QLVKNLRQE</sup>                                                               |
| NP_065916.2    | 893 | RTSSIIYLYDCTEVSPYCLLFFGGDISIQKDN <sup>DQ</sup> ETIAVDEWIVFQSPART <sup>HLVKELRKE</sup>                                                  |
| <hr/>          |     |                                                                                                                                        |
| XP_015147310.1 | 932 | LDDLLQEKIENPHVDWNDTKSRD <sup>AVLTA</sup> IDLIT <sup>TOENES</sup> ARNYAPRFQ <sup>SERC</sup> S                                           |
| XP_027320349.1 | 933 | LDDLLQEKIENPHVDWNDTKSRD <sup>AVLTA</sup> IDLIT <sup>TOENES</sup> ARNYAPRFQ <sup>NERYS</sup>                                            |
| XP_013048508.1 | 855 | LDDLLQEKIENPHVDWNDT <sup>TSR</sup> D <sup>AVLTA</sup> IDLIT <sup>TOENES</sup> ARNYAPRFQ <sup>NERYS</sup>                               |
| NP_065916.2    | 953 | LDI <sup>L</sup> LLQEKIE <sup>S</sup> PHVDWNDTKSRD <sup>CAVLS</sup> AIIDLIT <sup>KTOEKAT</sup> PRN <sup>F</sup> PPRFQ <sup>DGYYS</sup> |

**Figure S9:** Schematic alignment of DHX36 protein sequences of chicken, duck, goose and human. Depicted are DEAD box helicase region, domain of unknown function (DUF), HA2-associated domain, HelicC domain in black, maroon, red and grey underlining respectively. The DExH box is boxed in blue.

NP\_001025971.1 1 MSHVAVENALSLDQQFSGGLDLNSSDSQSEGSATSKGRYIPPHLRNREASKQGF--DSGGW  
XP\_005012555.2 1 MEDLSR-----RMFSGGLDLNSSDSQSEGSSTSKGRYIPPHLRNREASKQGF--DSGGW  
XP\_013046370.1 1 MEDLSR-----RMFSGGLDLNSSDSQSEGSSTSKGRYIPPHLRNREASKQGF--DSGGW  
NP\_001347.3 1 MSHVAVENALGLDQQFAGLDLNSDNDQSGGSASKGRYIPPHLRNREASKGFYDKDSSGW

NP\_001025971.1 59 SISRDKDAYSSFGARS DRGAKSSFF-DRGNGSRGGRYEERGR-----GSDYDRSGFGRF  
XP\_005012555.2 52 SSSRDKDAYSSFGVRS DRGAKSSFF-DRGNGSRGGRYEERGR-----GSDYDRSGFGRF  
XP\_013046370.1 52 SSSRDKDAYSSFGVRS DRGAKSSFF-DRGNGSRGGRYEERGR-----GSDYDRSGFGRF  
NP\_001347.3 61 SSSKDKDAYSSFGSRSDSRGKSSFFS DRGSGSRG-RFDDRGRSDYDGI GSRGDRSGFGRF

NP\_001025971.1 112 DRGGNSRWC DKSEDDWSKPLPPSERLEQELFSGSNTGINFEKYDDIPVEATGSNCPPHI  
XP\_005012555.2 105 DRGGNSRWS DKSEDDWSKPLPPSERLEQELFSGSNTGINFEKYDDIPVEATGSNCPPHI  
XP\_013046370.1 105 DRGGNSRWS DKSEDDWSKPLPPSERLEQELFSGSNTGINFEKYDDIPVEATGSNCPPHI  
NP\_001347.3 120 DRGGNSRWC DKSEDDWSKPLPPSERLEQELFSGSNTGINFEKYDDIPVEATGSNCPPHI

NP\_001025971.1 172 ESFSDVDMGEIIMGNIELTRYTRPTPVQKHAIP I I KEKRDLMACAQTGSGKTA AFLLPIL  
XP\_005012555.2 165 ESFSDVDMGEIIMGNIELTRYTRPTPVQKHAIP I I KEKRDLMACAQTGSGKTA AFLLPIL  
XP\_013046370.1 165 ESFSDVDMGEIIMGNIELTRYTRPTPVQKHAIP I I KEKRDLMACAQTGSGKTA AFLLPIL  
NP\_001347.3 180 ESFSDVDMGEIIMGNIELTRYTRPTPVQKHAIP I I KEKRDLMACAQTGSGKTA AFLLPIL

NP\_001025971.1 232 SQIYADGPGDALRAMKENG RY GRRKQY P I S L V L A P T R E L A V Q I Y E E A R K F A Y R S R V R P C V  
XP\_005012555.2 225 SQIYADGPGDALRAMKENG RY GRRKQY P I S L V L A P T R E L A V Q I Y E E A R K F A Y R S R V R P C V  
XP\_013046370.1 225 SQIYADGPGDALRAMKENG RY GRRKQY P I S L V L A P T R E L A V Q I Y E E A R K F A Y R S R V R P C V  
NP\_001347.3 240 SQIYS D G P G A L R A M K E N G R Y G R R K Q Y P I S L V L A P T R E L A V Q I Y E E A R K F A Y R S R V R P C V

NP\_001025971.1 292 VYGGADIGQQIRD L E R G C H L L V A T P G R L V D M M E R G K I G L D F C K Y L V I D E A D R M L D M G F E P  
XP\_005012555.2 285 VYGGADIGQQIRD L E R G C H L L V A T P G R L V D M M E R G K I G L D F C K Y L V I D E A D R M L D M G F E P  
XP\_013046370.1 285 VYGGADIGQQIRD L E R G C H L L V A T P G R L V D M M E R G K I G L D F C K Y L V I D E A D R M L D M G F E P  
NP\_001347.3 300 VYGGADIGQQIRD L E R G C H L L V A T P G R L V D M M E R G K I G L D F C K Y L V I D E A D R M L D M G F E P

NP\_001025971.1 352 Q I R R I V E Q D T M P P K G V R H T M M F S A T F P K E I Q M L A R D F L D E Y I F L A V G R V G S T S E N I T Q K V  
XP\_005012555.2 345 Q I R R I V E Q D T M P P K G V R H T M M F S A T F P K E I Q M L A R D F L D E Y I F L A V G R V G S T S E N I T Q K V  
XP\_013046370.1 345 Q I R R I V E Q D T M P P K G V R H T M M F S A T F P K E I Q M L A R D F L D E Y I F L A V G R V G S T S E N I T Q K V  
NP\_001347.3 360 Q I R R I V E Q D T M P P K G V R H T M M F S A T F P K E I Q M L A R D F L D E Y I F L A V G R V G S T S E N I T Q K V

|                |     |                                                                |
|----------------|-----|----------------------------------------------------------------|
| NP_001025971.1 | 412 | VWVEELDKRSFLDLLLNATGKDSLTLVVFVETKKGADALEDFLYHEGYACTSIHGDRSQRD  |
| XP_005012555.2 | 405 | VWVEESDKRSFLDLLLNATGKDSLTLVVFVETKKGADALEDFLYHEGYACTSIHGDRSQRD  |
| XP_013046370.1 | 405 | VWVEESDKRSFLDLLLNATGKDSLTLVVFVETKKGADALEDFLYHEGYACTSIHGDRSQRD  |
| NP_001347.3    | 420 | VWVEESDKRSFLDLLLNATGKDSLTLVVFVETKKGADSLLEDFLYHEGYACTSIHGDRSQRD |
|                |     |                                                                |
| NP_001025971.1 | 472 | REEALHQFRSGKSPILVATAVAARGLDISNVKHVINFDLPSDIEEYVHRIGRTGRVGNLG   |
| XP_005012555.2 | 465 | REEALHQFRSGKSPILVATAVAARGLDISNVKHVINFDLPSDIEEYVHRIGRTGRVGNLG   |
| XP_013046370.1 | 465 | REEALHQFRSGKSPILVATAVAARGLDISNVKHVINFDLPSDIEEYVHRIGRTGRVGNLG   |
| NP_001347.3    | 480 | REEALHQFRSGKSPILVATAVAARGLDISNVKHVINFDLPSDIEEYVHRIGRTGRVGNLG   |
|                |     |                                                                |
| NP_001025971.1 | 532 | LATSFFNERNINITKDLLDLLVEAKQEVPSWLENMAYEQHHKGGGSRGRSKS-RFTGGFG   |
| XP_005012555.2 | 525 | LATSFFNERNINITKDLLDLLVEAKQEVPSWLENMAYEQHHKGGGSRGRSKSSRFSGGFG   |
| XP_013046370.1 | 525 | KYGQGFV-----PNLLGVVLLAKWHT-----                                |
| NP_001347.3    | 540 | LATSFFNERNINITKDLLDLLVEAKQEVPSWLENMAYEHHYKGS-SRGRSKSSRFSGGFG   |
|                |     |                                                                |
| NP_001025971.1 | 591 | ARDYRTSSGAGSSSFSSSRPASGRITGGSG--SRGFGGGGYGGFYNSDGYGGNYNSQGVD   |
| XP_005012555.2 | 585 | ARDYRTSSGSGSSSFSSSRSTSSRSGGSG--SRGFGGGGYGGFYNSDGYGGNYNSQGVD    |
| XP_013046370.1 | 547 | -----TTECLGKACVPS-----V--TRQYC-----                            |
| NP_001347.3    | 599 | ARDYRQSSGASSSSFSSSRASSSRSGGGGHGS SRGFGGGGYGGFYNSDGYGGNYNSQGVD  |
|                |     |                                                                |
| NP_001025971.1 | 648 | WWGN                                                           |
| XP_005012555.2 | 642 | WWGN                                                           |
| XP_013046370.1 |     | ----                                                           |
| NP_001347.3    | 659 | WWGN                                                           |

**Figure S10:** Schematic alignment of DDX3X protein sequences of chicken, duck, goose and human. Well conserved domains include DEAD box helicase region (blue box), HelicC and C-terminal arginine-serine (RS) rich region. Note variation in RS region in goose DDX3

XP\_025001441.1 1 MA-----GELTDKKDR-----  
XP\_021135293.1 1 MDKTIINVRLLLIEKIINWTDLGRWGI PGPAQGRPRPEEADKKDR-----  
XP\_013054789.1 1 MP-----ASCPQWKTEILDYCPTRVLLIGC  
NP\_004809.2 1 MA-----GELADKKDR-----

XP\_025001441.1 12 -----DASPVKEERKRSRSPDRDRD-RDRDRKGSPPKDRKRHRSRDRRR-GSRSRSRSR  
XP\_021135293.1 46 -----DASPVKEERKRSRSPDRD---RDRDRKGSPPKDRKRHRSRDRRAA--SCSRSRSR  
XP\_013054789.1 27 KTDLRITDLSTIMELSHQKQAPISYEQPPGLCSGGTIPVGGVGV-----GQG--LRSVP-  
NP\_004809.2 12 -----DASPSKEERKRSRTPDRERD-RDRDRKSSPSKDRKRHRSRDRRRGSGSRSRSRSR

XP\_025001441.1 64 SKSVDRRRRHKERD---RDRGKKDREREKDGHRDKDRKRSSLSPSRGKDSKSRKERDS  
XP\_021135293.1 95 SKSVDS-----RRDKDRKRSSLSPSRGKDSKSRKERDS  
XP\_013054789.1 78 -----NFPPVLLGSLSPSRGKDSKSRKERDL  
NP\_004809.2 65 SKSAERERRRHKERDKEERDKKDRDRKDGHRDKDRKRSSLSPPGRGKDFKSRKDRDS

XP\_025001441.1 120 RKAEEEEENALKKEKAQPLSLEELLAKKKAEEEEAEAKPKFLSKAEREAEALRRRQOEVE-  
XP\_021135293.1 128 RKLEEEEEENALKKEKAQPLSLEELLAKKKAEEEEAEAKPKFLSKAEREAEALRRRQOEVEE  
XP\_013054789.1 104 RKAEEEEENALKKEKVR-----TPRSLPASPWGAGALRSFPC---  
NP\_004809.2 125 KKDE-EDHGDKKPKAQPLSLEELLAKKKAEEEEAEAKPKFLSKAEREAEALRRRQOEVE-

XP\_025001441.1 179 ERQRLLEERKKRKQFQEMGRKMLEDPQERERRRERMERETNGTEDEEGRQKIREEKD  
XP\_021135293.1 188 ERQRLLEERKKRKQFQEMGRKMLEDPQERERRRERMERETNGTEDEEGRQKIREEKD  
XP\_013054789.1 142 -----SPEDPQERERRRERMERETNGTEDEEGRQKIREEKD  
NP\_004809.2 183 ERQRLLEERKKRKQFQDGRKMLEDPQERERRRERMERETNGNEDEEGRQKIREEKD

XP\_025001441.1 239 KSKELHAIKERYLGGVKKRRRTRHLNDRKFVFEWDASEDTSIDYNPLYKERHQVQLLGRG  
XP\_021135293.1 248 KSKELHAIKERYLGGVKKRRRTRHLNDRKFVFEWDASEDTSIDYNPLYKERHQVQLLGRG  
XP\_013054789.1 180 KSKELHAIKERYLGGVKKRRRTRHLNDRKFVFEWDASEDTSIDYNPLYKERHQVQLLGRG  
NP\_004809.2 243 KSKELHAIKERYLGGVKKRRRTRHLNDRKFVFEWDASEDTSIDYNPLYKERHQVQLLGRG

XP\_025001441.1 299 FIAGIDLKQQKREQSRFYGDLMEKRRTLEEKEQEEARLRKLRKKEAKQRWDDRHWSQKKL  
XP\_021135293.1 308 FIAGIDLKQQKREQSRFYGDLMEKRRTLEEKEQEEARLRKLRKKEAKQRWDDRHWSQKKL  
XP\_013054789.1 240 FIAGIDLKQQKREQSRFYGDLMEKRRTLEEKEQEEARLRKLRKKEAKQRWDDRHWSQKKL  
NP\_004809.2 303 FIAGIDLKQQKREQSRFYGDLMEKRRTLEEKEQEEARLRKLRKKEAKQRWDDRHWSQKKL

XP\_025001441.1 359 DEMTDRDWRI FREDYSITTKGGKIPNPIRSWKDSSLPPHILEVIDKCGYKEPTPIQRQAI  
XP\_021135293.1 368 DEMTDRDWRI FREDYSITTKGGKIPNPIRSWKDSSLPPHILEVIDKCGYKEPTPIQRQAI  
XP\_013054789.1 300 DEMTDRDWRI FREDYSITTKGGKIPNPIRSWKDSSLPPHILEVIDKCGYKEPTPIQRQAI  
NP\_004809.2 363 DEMTDRDWRI FREDYSITTKGGKIPNPIRSWKDSSLPPHILEVIDKCGYKEPTPIQRQAI

---

XP\_025001441.1 419 PIGLQNRDI IGVAETGSGKTA AFLIPLLWITTL PKIDRIEESDQGPYAI ILAPTRELAQ  
XP\_021135293.1 428 PIGLQNRDI IGVAETGSGKTA AFLIPLLWITTL PKIDRIEESDQGPYAI ILAPTRELAQ  
XP\_013054789.1 360 PIGLQNRDI IGVAETGSGKTA AFLIPLLWITTL PKIDRIEESDQGPYAI ILAPTRELAQ  
NP\_004809.2 423 PIGLQNRDI IGVAETGSGKTA AFLIPLLWITTL PKIDRIEESDQGPYAI ILAPTRELAQ

---

XP\_025001441.1 479 QIEEETIKFGKPLGIRTVAVIGGISREDQGFRLRMGCEIVIATPGRLIDVLENRYLVLSR  
XP\_021135293.1 488 QIEEETIKFGKPLGIRTVAVIGGISREDQGFRLRMGCEIVIATPGRLIDVLENRYLVLSR  
XP\_013054789.1 420 QIEEETIKFGKPLGIRTVAVIGGISREDQGFRLRMGCEIVIATPGRLIDVLENRYLVLSR  
NP\_004809.2 483 QIEEETIKFGKPLGIRTVAVIGGISREDQGFRLRMGCEIVIATPGRLIDVLENRYLVLSR

---

XP\_025001441.1 539 CTYVVI DEADMIDMGFEPDVQKILEHMPVTN QKPDTDEAEDPEKMLANFESGKHKYRQT  
XP\_021135293.1 548 CTYVVI DEADMIDMGFEPDVQKILEHMPVTN QKPDTDEAEDPEKMLANFESGKHKYRQT  
XP\_013054789.1 480 CTYVVI DEADMIDMGFEPDVQKILEHMPVTN QKPDTDEAEDPEKMLANFESGKHKYRQA  
NP\_004809.2 543 CTYVVI DEADMIDMGFEPDVQKILEHMPVSN QKPDTDEAEDPEKMLANFESGKHKYRQT

---

XP\_025001441.1 599 VMFTATMPPAVERLARSYLRRPAVVYIGSAGK PHERVEQKVFLMS ESEK RKKLLAILEQG  
XP\_021135293.1 608 VMFTGER-----ELQGGCKCGILE-----SGMPDS PPNRKKLLAILEQG  
XP\_013054789.1 540 SPPLP-----SSPPNRKKLLAILEQG  
NP\_004809.2 603 VMFTATMPPAVERLARSYLRRPAVVYIGSAGK PHERVEQKVFLMS ESEK RKKLLAILEQG

---

|                |     |                                                                                        |
|----------------|-----|----------------------------------------------------------------------------------------|
| XP_025001441.1 | 659 | FDPPI I I FVNQKKGCDVLAKSLEKMGYNACTLHGGKGQEOREFALSNLKAGAKDILVATD                        |
| XP_021135293.1 | 648 | FDPPI I I FVNQKKGCDVLAKSLEKMGYNACTLHGGKGQEOREFALSNLKAGAKDILVATD                        |
| XP_013054789.1 | 562 | FDPPI I I FVNQKKGCDVLAKSLEKMGYNACTLHGGKGQEOREFALSNLKAGAKDILVATD                        |
| NP_004809.2    | 663 | FDPPI I I FVNQKKGCDVLAKSLEKMGYNACTLHGGKGQEOREFALSNLKAGAKDILVATD                        |
| <hr/>          |     |                                                                                        |
| XP_025001441.1 | 719 | VAGRGIDIHDVSMVVNYDMAKNIEDYIHRIGRTGRAGKSGVAITFLTKESTVFDLQQA                             |
| XP_021135293.1 | 708 | VAGRGIDIHDVSMVVNYDMAKNIEDYIHRIGRTGRAGKSGVAITFLTKESTVFDLQQA                             |
| XP_013054789.1 | 622 | VAGRGIDIHDVSMVVNYDMAKNIEGESGAWYFTYS-----V---L L S L L A C S V F L H ----               |
| NP_004809.2    | 723 | VAGRGIDIQDVSMVVNYDMAKNIEDYIHRIGRTGRAGKSGVAITFLTKESTAVFYELKQA                           |
| <hr/>          |     |                                                                                        |
| XP_025001441.1 | 779 | I L E S P V S S C P P E L A N H P D A Q H K P G T I L T K K R R E E T I F A -----      |
| XP_021135293.1 | 768 | I L E S P V S S C P P E X X X X - X X X X P G T I L T K K R R E E T I F A -----        |
| XP_013054789.1 | 670 | -----I S S I G K L L L M V A I E A T Y L V L V E G P Q A A L F D N A D L L V V A N A L |
| NP_004809.2    | 783 | I L E S P V S S C P P E L A N H P D A Q H K P G T I L T K K R R E E T I F A -----      |

**Figure S11:** Schematic alignment of DDX23 protein sequences of chicken, duck, goose and human. Depicted are the putative nuclear localization signal sequences (NLSs), DEAD box region, and HelicC domain in grey, black, and red underlining respectively. The DEAD box is boxed in blue.



XP\_025006699.1 1 MKFRRG--R-RFTSSAKLRKGGIEVIGKWKTVIEDPNVEVDEQFIDVCELEELTEYKLV  
XP\_027314331.1 1 MKAKKG--R-RFTSSVKLRKGLAVIGKWKTVIEDPNLFADEQFRDIVCELEELTEYKLV  
XP\_013037286.1 1 MKAKKG--R-RFTSSVKLRKGGIEVIGKWKTVIEDPNLFADEQFRDIVCELEELTEYKLV  
NP\_065147.1 1 MKLKDTKSRPKQSSCGKFQTKGIVGKWKVKIDPNMFADGQMDIVCFEELTYQLV

XP\_025006699.1 58 SDKVGGK----NKQKRKSEDLSEEGSEEE EEEEEAVIPPKKKKCKDLKTRADKSDDSN-  
XP\_027314331.1 58 SNKVGQV----SQQKRKVKSLSE----GSEEEEEPVVPPKKKKKGKDLKTKTDTGDDTN-  
XP\_013037286.1 58 SNKVGKV----NEQKRKAQSLSE----GSGEEEEPVVPPKKKKKSKDLKTRTDKSDDTN-  
NP\_065147.1 61 PAKNPSSLFSKEAPKRKAQAVSE----EEEEEGKSSSPKKKIKLKKSKNVATEGTSTOK

XP\_025006699.1 113 ATEVDVPVDEEKRCCEIIVGADDKVCGH-TAESTSS---TKNAAKNKKKEKEKVVKNKA  
XP\_027314331.1 109 ATEVDVPVDEETRCCEIIEGANCEDSGH-TAGSTSS---TKSAVKKKK---KKVDKNKT  
XP\_013037286.1 109 ATEVDVPVDEETKCEEITEGANREDNGH-RAESTSS---TKSAVKKKK---KKVDKNKT  
NP\_065147.1 117 EFEVKDPE-----LEAQGDMDVCDDEPEAGEMISENLVQIAPKKKK---NKG---KK

XP\_025006699.1 169 SQVQDASPPVTTTSKKVKNWTEVLSITSTDHKADVSARKDLFVPPVPLKALSSLGFSAPT  
XP\_027314331.1 161 SQDQEALPSVTTTSKKIKNWSTEVLSASTDHKADVSARKDLFVPPKPLKALS YLGFSAPT  
XP\_013037286.1 161 SQDQEALPSVTTTSKKVKNWSTEVLSASDHDKADVSARKDLFVPPKPLKALS YLGFSAPT  
NP\_065147.1 162 GLPSQSTAARKVPPKAKTWIPEV----HDQKADVSARKDLFVPPVPLKALS LGFSAPT

XP\_025006699.1 229 IQALTLPSAIRDNMDLGAETGSGKTLFAIPIHHSVLEWQKSNSSASVSDSVSKKP--  
XP\_027314331.1 221 IQALALPSAIRDNMDLGAETGSGKTLFAIPIHHSVLEWQKSNSSMSRNDSVSKES--  
XP\_013037286.1 221 IQALALPSAIRDNMDLGAETGSGKTLFAIPIHHSVLEWQKSNSSMSRNDSVSKES--  
NP\_065147.1 218 IQALTLAPAIRKLDLGAETGSGKTLFAIPIHSAVLEWQKRNAAAPPSNTEAPPGET

XP\_025006699.1 287 -YQHHEMRWENDEAE-----KPN-----HQQVEDSGDEDD  
XP\_027314331.1 279 -HQHDETRWENDEAE-----KLT-----HQQVEDSGDEDD  
XP\_013037286.1 279 -HQHDETRWENDEAE-----KLT-----HQQVEDSGDEDD  
NP\_065147.1 278 RTEAGAETRSPGKAFAESDALPDDTVIESEALPSDIAAEARAKTGGTVSDQALLFGDDDA

XP\_025006699.1 318 ASFATGCVK-----VQ-----ENTEDSSNKEHTVGLHKKRPLLGLVLTPT  
XP\_027314331.1 310 ASFATGCVK-----VL-----ENAEFDSSDKGHAVGLHKKRPLLGLVLTPT  
XP\_013037286.1 310 ASFATGCVK-----VL-----ENAEFDSSDKGHTVGLHKKRPLLGLVLTPT  
NP\_065147.1 338 GEGPSSLIIEKPVPKQNEEENLDKEQTGNLKOGLDDKSAITCKAYPKRPLLGLVLTPT

XP\_025006699.1 360 ELAVQVKHHIDAVAKFTGIKTAILVGGMAAQKQERVLNRKPEIVIATPGRLWELIKERHP  
XP\_027314331.1 352 ELAVQVKHHIDAVTKFTGIKTAILVGGMAAQKQERVLNRKPEIVIATPGRLWELVKAKHP  
XP\_013037286.1 352 ELAVQVKHHIDAVTKFTGIKTAILVGGMAAQKQERVLNRKPEIVIATPGRLWELVKAKHP  
NP\_065147.1 398 ELAVQVKQHIDAVARFTGIKTAILVGGMSTQKQORMLNRKPEIVIATPGRLWELIKERHY

XP\_025006699.1 420 HLSNLRQLRCLVIDEADRMVERGHFLELSQLELLNDSQYNPKRQTFVFSATLTLVHQT  
XP\_027314331.1 412 HLSNLRQLRCLVIDEADRMVERGHFLELSQLELLNDSQYNPKRQTFVFSATLTLVHQT  
XP\_013037286.1 412 HLSNLRQLRCLVIDEADRMVERGHFLELSQLELLNDSQYNPKRQTFVFSATLTLVHQT  
NP\_065147.1 458 HLSNLRQLRCLVIDEADRMVERGHFLELSQLELLNDSQYNPKRQTFVFSATLTLVHQA

XP\_025006699.1 480 ARVLQKKNAKKDKKTKLEMLMEKVGIGKPKVIDLTRKEATVETLMETRIHCdTNEKDY  
XP\_027314331.1 472 TRVLQKKNAKKMDKKTLEMLMEKVGIGKPKVIDLTRKEATVETLMETRIHCdTNEKDY  
XP\_013037286.1 472 TRVLQKKNAKKMDKKTLEMLMEKVGIGKPKVIDLTRKEATVETLMETRIHCdTNEKDY  
NP\_065147.1 518 ARVLHKKHTKKMDKTAKLDTLMOKIGMRGKPKVIDLTRNEATVETLMETRIHCdTNEKDF

XP\_025006699.1 540 YLYYFLLQYPGRTMVFNANSIDCIKRLSSLLIILNCDPLPLHANMHQQRKLNLERFAERE  
XP\_027314331.1 532 YLYYFLLQYPGRTMVFNANSIDCIKRLSSLLIILNCDPLPLHANMHQQRKLNLERFAERE  
XP\_013037286.1 532 YLYYFLLQYPGRTMVFNANSIDCIKRLSSLLIILNCDPLPLHANMHQQRKLNLERFAERE  
NP\_065147.1 578 YLYYFLMQYPGRSTVFNANSIDCIKRLSGLLKVLDIMPLTLHACMHQQRKLNLEQFARE

XP\_025006699.1 600 SCVLLTDDVAARGLDIPNVQVVIHYQVPRTSELYVHRSGRTARAANEGLSLLLIGPDDLI  
XP\_027314331.1 592 SCVLLTDDVAARGLDIPNVQVVIHYQVPRTSELYVHRSGRTARAANEGLSLLLIGPDDLI  
XP\_013037286.1 592 SCVLLTDDVAARGLDIPNVQVVIHYQVPRTSELYVHRSGRTARAANEGLSLLLIGPDDLI  
NP\_065147.1 638 DCVLLATDVAARGLDIPKVVQVVIHYQVPRTSELYVHRSGRTARATNEGLSLLLIGPDDVI

XP\_025006699.1 660 NFRKIYKTLQKSEELPLFPVETKYMTAikerNLARQIEKAEFFNGRAKQHDSWLQQAEE  
XP\_027314331.1 652 NFRKIYKTLQKSEELPLFPVETKYMTSikERMNLARQIEKAEFFNSRAKQHDSWLQQAEE  
XP\_013037286.1 652 NFRKIYKTLQKSEELPLFPVETKYMTSikERMNLARQIEKAEFFNSRAKQHDSWLQQAEE  
NP\_065147.1 698 NFKKIYKTLKQDEDIPLFPVQTKYMDVikerNLARQIEKSEYRNFOACLHNSWLEQAAA

XP\_025006699.1 720 ALEVLDLDDLLMGKKTSEQEESQKQKMLKGMKKQLKHMLSQPLFKVFMKTKYPTQSGKLL  
XP\_027314331.1 712 ALEVLDLDDLLFMGRKKTSEQEESQKQKMLKGMKKQLKHMLSQPLFKVFMKTKYPTQSGKLL  
XP\_013037286.1 712 ALEVLDLDDLLFMGRKASEQEESQKQKMLKGMKKQLKHMLSQPLFKVFMKTKYPTQSGKLL  
NP\_065147.1 758 ALEIELEEDMYKGGKADQOEERRKQKQKMLKGMKKQLKHMLSQPLFKVFMKTKYPTQSGKPP

|                |     |               |             |              |       |       |
|----------------|-----|---------------|-------------|--------------|-------|-------|
| XP_025006699.1 | 780 | LPQTSAGNSEI   | ALSI        | SKKQARRKK    | ----- | SVKSN |
| XP_027314331.1 | 772 | LPQTSVGSSESAL | GTVSKQQAKK  | KK           | ----- | SKK-N |
| XP_013037286.1 | 772 | LPQSSAGNSESAL | GTVSKQHAKK  | KK           | ----- | SKTIR |
| NP_065147.1    | 818 | LLVSAPSKSESAL | SCLSKQKKKKT | KKPKPEPQPEQP | PS    | TSAN  |

**Figure S12:** Schematic alignment of DDX24 protein sequences of chicken, duck, goose and human. The DEAD box is boxed in blue.

XP\_004940975.1 1 -----MDSAEDNFK--H  
XP\_027312235.1 1 -----MDSAEDNFKVVC  
XP\_013030722.1 1 MGGGSTLKEVCWQAQWRTGLCCRSQPGRALLEAACRVAAGAGESRSVMDSAEDNFKVVS  
NP\_060101.3 1 -----M-----

XP\_004940975.1 12 DYANES---ADSDDKDSECVDSEKINFTATEEDKE--STSDRDEEDVTDHNEFAAVVQML  
XP\_027312235.1 14 DTNGSTSKDDSDMDSDVIDSEEIGCISTKKNKEGGSTSDHDEGDETSDKAEAAVVQML  
XP\_013030722.1 61 DNNGSTSKDDSDMDSECIDSEEIGFISRKKNKEGGSTSDHDEEDETNDNAEAAVVQML  
NP\_060101.3 3 -----

XP\_004940975.1 67 KEKEDREKEAEDPDYGETYSILNNTDEVIQKESQNEGNFRVLQNKLNQDPEVRKHLEIL  
XP\_027312235.1 74 KEKEDKEKEDPDYGKAYNILTTEEVAQKESQTEGKDFRVLQNEWDSKSPEIRKHLEFL  
XP\_013030722.1 121 KEKEDREKVEDPDYDNVYNILTTEEVEESHATAGKDFRFLQDEWDSQSPEIRKHLEFL  
NP\_060101.3 3 -----RNVLTTF-----S

XP\_004940975.1 127 KKLKQSIWPSLSKASFEVSLKDFVESEFFVIDGDSLILTFLLNE----EVOHLTLFYLIEC  
XP\_027312235.1 134 KILKLIHWPSLSRARYVSLKDFVESEFFVIDGDSLILMLLNE----EVOYLTIFYRIEC  
XP\_013030722.1 178 KILKLIHWPSLSRARYVSLKDFVESEFFVIDGDSLILMLLNE----EVOYLNIFYLIEC  
NP\_060101.3 11 QEMSQLLNEMPKAEYSSLFNDFVESEFFVIDGDSLITCICEISFKPGQNLHFFYLVER

XP\_004940975.1 183 FLHDFLQKGAQYIIVFFKDAEQMYFONPQFLFLRTALVEHLKHNTRITVHTEFSNCLSPA  
XP\_027312235.1 190 FLQDFLQKGAQYIIVFFKDAEQMYFRYPHFLFLRTALIEHLKHNTRITVHTEFSNCLSPA  
XP\_013030722.1 234 FLQDFLQKGAQYIIVFFKDAEQMYFRYPHFLFLRTALIEHLKHNTRITVHTEFSNCLSPA  
NP\_060101.3 71 MLVDLISKGEQETIVFFKDAEYAYFNPELISLRTALILHLQKNTTIDVRIITFSRCLSKE

XP\_004940975.1 243 WEIFLKKSPYFIIISDIGLTSLQNTYLTIFIAHLSLKKINWQAFGQECDTLRVYGYHL  
XP\_027312235.1 250 WEVFLKKSPYFIIIVSDIGLTSLQNTYLTIFIAHLSLKKITVWLASGQECDTLRVYGYHL  
XP\_013030722.1 294 WEIFLKKSPYFIIIVSDIGLTCPTQNTYLTIFIAHLSLKKITVWLASGQEDTLRVYGYHL  
NP\_060101.3 131 WGSFLEESYPYFIIIVADEGLNDLQTLFNFLIHSWARKINWVLSGQESDVLCTIYAYLL

XP\_004940975.1 303 QSMKHRIFQKYGKDLQSAC----EAIVRYQELSLYLYEHLKLSLKSQNEVYQTVLL  
XP\_027312235.1 310 QSMKHRIFQKYEKDLRCVC----EAIVRYKEPSLYLYGHLKLSLKSQEEVCRTEPL  
XP\_013030722.1 354 QSRKHRIFQKYEKDLQCLC----EAIVRYKEPSLCLYGHLKLSLKSQEEVCQTEPL  
NP\_060101.3 191 PSMYRHQIFSWKKNQNKDAYTTLLNQERFKLSALAPLFGSLK--WNNTEEAHKTVSL

XP\_004940975.1 358 LKKLWPEGSDIRRVICVLTCAVGLKIYSDALESAHASLGAKPEQSESEERSKPLSPEEATD  
XP\_027312235.1 365 LKQLWPEGSDIRRVVVCVLACAVGLKIYSDMLTNAHASRGTKTEKSESGRSKPPSPEAAAD  
XP\_013030722.1 409 LKQLWPEGSDIRRVVVCVLACAVGLKIYSDMLKNAHASRGTKTEKSESGRSKPLSPEEAAAD  
NP\_060101.3 249 LKQLWPEGSDIRRVVFCVTSCLSLRMVHRFLGNREPSSGQETETIQQ-VNSNCLLQEMED

XP\_004940975.1 418 LCRMQCLTVVFLHMPLSQRAQIRVMKSCWTEQVLPPIKMQQLCAHFVVKQLSDINDWKL  
XP\_027312235.1 425 LCRMQCLTVVFLHMPLSQRAQIRVMKSCWTKQVLPPIKMQQLCVHFFVLKELSDKNDWKL  
XP\_013030722.1 469 LCRMQCLTVVFLHMPLSQRAQIRVMKSCWTKQVLPPIKMQQLCAHFVVKQLSDKNDWKL  
NP\_060101.3 308 LCKLHCLTVVFLHMPLSQRAQIRVTSHWAEDEKPLIQMKKWCEYFLLRNHTFEFWNL

XP\_004940975.1 478 DLTYPDLNDSLLRNLAHYEIEYSEGLEFQKELGKEMDKEYQFLWDIVTKLTVNYDFG  
XP\_027312235.1 485 DLTYPDLNDESLLKNLAHYQIEYKGLEFQKELGKEMEDEYLSLWDAVTKLTVKYGFG  
XP\_013030722.1 529 DLTYPDLSDDSLLINLAHYEIEYSEGLEFQKELGKEMEDQYRSLWDAVTKLTVKYGFG  
NP\_060101.3 368 NLIHLSDLNDELLKNIAFYENENVKGLHL--NLGDTIMKDYEYLWNTVSKLVRDEEVG

XP\_004940975.1 538 DAFPVIRNTSQVFDHQQTSFRV-CDEKIPDIGLIPKSDLAEYAGDVLKDLPVLESNDP  
XP\_027312235.1 545 DAFPVRTTSQVFLDQEQTSFRV-YEDKIPAGLFPVKSDLVKEYAGDILKDLPVLDNDP  
XP\_013030722.1 589 DAFPVRTTSQVFLDQEQTSFRV-YEDKIPAGLFPVKSDLVKEYAGDILKDLPVLDNDP  
NP\_060101.3 426 QFPVIRRTTKVCFLEKPKSPIKSSNEMVPIGFIPTSSFWDKVAGDILKDLPVLEKSDP

XP\_004940975.1 597 AVTSLAKYKEFDELRRHWSGRPLSEYERVSNADAKSKDADERKQIQKLQTFYRLYGST  
XP\_027312235.1 604 AVSSLTKYKEFDELRRHWSGRPLSEYERVHCNADAKSKDPYERKQIQKLQTFYRFGST  
XP\_013030722.1 648 AVSSLTKYKEFDEHRRHWSGRPLSEYERVHCNADAKSKDPYERKQIQKLQTFYRFGST  
NP\_060101.3 486 IVTSLVKQKEFDELRRHWSGRPLSDDYDRSRCQFDEKSRDPRVLSVQKYHVFQRFYGNL

XP\_004940975.1 657 LEGSTSKFIVHONDVPCSNNTAVKKAQTHKSKAEIAEENNRLLKAKEEKKEEQWKTLO  
XP\_027312235.1 664 LQEGTSKFVVCQKNAPGSANNPVKKKKMOKSKAEIAEENNRLLKAKEEMKEEQWKTLO  
XP\_013030722.1 708 LQEGTSKFIVCQKDAAGSANNPVKKKKMOKSKAEIAEENNRLLKAKEEMKEEQWKTLO  
NP\_060101.3 546 LETVSSKIIVTQTIKSKKDFSGPKSKKAHEIKAEIAEENNRLLFAEEQKEEQWNAIS

XP\_004940975.1 717 ISTEKEIKANLTVGINKMEKFLKIVKSKSVKFSVEMSLSACLEAWKKEHCCKQ-GNKPKD  
XP\_027312235.1 724 ISTEKEIKANLTVGINKLEKFLKIVKSKSVKFSVEMSGLSACLEVWKEHCCKQ-DTKSKD  
XP\_013030722.1 768 MSTEKEIKANLTVGINKLEKFLKIVKSKSVKFSVEMSGLSACLEAWKKEHCCKQ-ATKSKD  
NP\_060101.3 606 FSIEEQIKENLHSGIKSLEDFLKSKSSCVKLOVEVGLIACLKAWKEHCREEGKTKD

XP\_004940975.1 776 LSSAVQLMRRIHILLEKYQDLLEKSHLQKLSQYLQQLLGFENLACSLGQVREGRDD--QN  
XP\_027312235.1 783 LSKAVQLMRRIHILLEKYQDLLEKSHLQKLTQCLRLLGFENLACSLSGQVREKSDG--EN  
XP\_013030722.1 827 LSKAVQLMRRIHILLEKYQDLLEKPHLQKLTQCLRLLGFENLACSLSGQVREKSDG--EN  
NP\_060101.3 666 LSIIVQVMRRHSLMEKYSILLQEDDRQLARCLKYLGFDLASSLHPAQDAENDVKVKK

XP\_004940975.1 834 RSNYDVEVGPARFQIQYMDYLLREERNDPDPVQHFIPDTWQRELLDAVDNNE SAVIVA  
XP\_027312235.1 841 TSRYAIEVGPVRFQIQYMDYLLREERNDPDPVVENFIPDTWQRELLDAVDNNE SAVIVA  
XP\_013030722.1 885 TSRYAIEVGPVRFQIQYMDYLLREERNDPDPVVENFIPDTWQRELLDAVDNNE SAVIVA  
NP\_060101.3 726 RNKYSVGIIGPARFQIQYMGHYLIRDERKDPDPVQDFIPDTWQRELLDVVDKNE SAVIVA

XP\_004940975.1 894 PTSSGKTYASYCMEKVLKMSDEGVVVYVAPTKALVNQVVGSVYSRFTKKLPDGLVVCV  
XP\_027312235.1 901 PTSSGKTYASYCMEKVLKTSDDGVVVYVAPTKALVNQVVGTVYSRFTKLPDGLVVCV  
XP\_013030722.1 945 PTSSGKTYASYCMEKVLKTSDDGVVVYVAPTKALVNQVGTYSRFTKKLPDGLVVCV  
NP\_060101.3 786 PTSSGKTYASYCMEKVLKESDDGVVVYVAPTKALVNQVAITVQNRFTKNLPSCEVLCV

XP\_004940975.1 954 FTRDYRHDMNSQILVTPQCLEILMLSPRCQSWTKRIQYI I-----FDEIHCLGGEI  
XP\_027312235.1 961 FTRDYRNDVMNSQILVTPQCLXXXXYLX----XGRFITFTFFFLSSFPNIXVHCLGGEI  
XP\_013030722.1 1005 FTRDYRNDVMNSQILVTPQCLEILMLSPRCQKWKRIQYVI-----FDEVHCLGSEI  
NP\_060101.3 846 FTREYRHDAINCOLITVPACFEILLAPHRONWVKRIRYVI-----FDEVHCLGGEI

XP\_004940975.1 1007 GAEVWEHLLVTIRCPFLALSATISNPHLTEWLQSVKRYWQCAQNTIKGSSSTNSEKNFAR  
XP\_027312235.1 1017 GAEVWEHLLVTIRCPFLALSATISNPEHLTEWLQSVKRYWQRAENMIENSTNFEKNSTR  
XP\_013030722.1 1058 GAEVWEHLLVTIRCPFLALSATISNPEHLTEWLQSVKRYWQRAENTIEESPISSEKNSTR  
NP\_060101.3 899 GAEVWEHLLVMIRCPFLALSATISNPEHLTEWLQSVKRYWKQEDKIIE--NNLASKRHVGR

XP\_004940975.1 1067 KCKGTSIVKEQKKSRYRVLVLYEERYNDLEKYVCSVNGSDFGIEHHPCAALTVNHIENY  
XP\_027312235.1 1077 KLKVKSKVKEPKKRYRVLVLYGERYNDLEKYVCSSTGGDFLIEHHPCAALTVNHIENY  
XP\_013030722.1 1118 KLKVKSKVKEPKKSYRVLVLYGERYNDLEKYVCSSTGGDFLIEHHPCAALTVNHIENY  
NP\_060101.3 958 QAGFPKDYLVKQSYKVRVLVLYGERYNDLEKRVCSIKHGDIHFDEHHPCAALTVDHIERY

XP\_004940975.1 1127 GIPSDLSLSPRESIQLYDTMVKWQKWPRAQEDPEEFVSKNNVIKKMDVRKYEQELK  
XP\_027312235.1 1137 GIPADLSLSPRESIQLYDTMVEVWKEWPRAQELDPEEFVSKNKVVIKKMDVRKYEQELK  
XP\_013030722.1 1178 GIPADLSLSPRESIQLYDTMVEVWNEWPRQELDPEEFVSKNKVVIKTDVRKYEQELK  
NP\_060101.3 1018 GFPPDLILSPRESIQLYDAMFOIKSWPRAQELCPENFHFNNKVIKKMDARKYEESLK

|                |      |           |          |      |        |     |      |   |   |   |   |   |   |   |   |   |   |   |   |   |   |   |   |   |   |   |   |   |   |   |   |   |   |   |   |   |   |   |   |   |   |   |   |   |   |   |   |   |   |   |   |   |   |   |   |   |   |   |   |   |   |
|----------------|------|-----------|----------|------|--------|-----|------|---|---|---|---|---|---|---|---|---|---|---|---|---|---|---|---|---|---|---|---|---|---|---|---|---|---|---|---|---|---|---|---|---|---|---|---|---|---|---|---|---|---|---|---|---|---|---|---|---|---|---|---|---|---|
| XP_004940975.1 | 1187 | KELSNWIAV | GQRQKVNE | LENL | KPQPVD | CS  | Y    | E | K | W | K | R | F | A | R | F | V | D | K | L | H | E | M | D | K | L | P | A | I | F | F | I | F | G | L |   |   |   |   |   |   |   |   |   |   |   |   |   |   |   |   |   |   |   |   |   |   |   |   |   |   |
| XP_027312235.1 | 1197 | KELSKWIEL | GQRQKVCE | LDHF | KPQP   | V   | DCSD | Q | E | K | W | M | Q | F | A | C | F | V | E | K | L | H | E | M | D | K | L | P | A | I | F | I | F | G | L |   |   |   |   |   |   |   |   |   |   |   |   |   |   |   |   |   |   |   |   |   |   |   |   |   |   |
| XP_013030722.1 | 1238 | KELSKWIEL | GQRQKVYE | LDHF | KPQP   | V   | DCSD | Q | E | K | W | M | Q | F | A | C | F | V | E | K | L | H | E | M | D | K | L | P | A | I | F | I | F | G | L |   |   |   |   |   |   |   |   |   |   |   |   |   |   |   |   |   |   |   |   |   |   |   |   |   |   |
| NP_060101.3    | 1078 | AEL       | SWIK     | NG   | NVEQ   | ARM | L    | Q | N | L | S | P | E | - | A | D | L | S | P | E | N | M | I | T | M | F | P | L | L | V | E | K | L | R | K | M | E | K | L | P | A | I | F | F | E | K | L |   |   |   |   |   |   |   |   |   |   |   |   |   |   |
| XP_004940975.1 | 1247 | DSVENA    | A        | W    | N      | V   | E    | R | N | L | E | K | Q | D | N | E | R | D | P | K | M | E | K | E | K | E | D | I | K | N | K | L | R | K | N | K | I | L | M | K | F | E | F | T | D | I | K | V | K | P | S | K |   |   |   |   |   |   |   |   |   |
| XP_027312235.1 | 1257 | DSVERA    | A        | T    | N      | V   | F    | I | H | L | M | E | K | Q | K | N | E | Q | D | P | K | A | K | E | E | T | E | D | I | K | D | K | L | R | K | V | D | K | S | L | T | K | C | K | T | N | D | T | K | K | L | T | S | K |   |   |   |   |   |   |   |
| XP_013030722.1 | 1298 | DSVERA    | A        | A    | N      | N   | F    | I | H | L | M | E | K | R | K | N | E | Q | D | P | K | A | K | E | E | T | E | D | I | K | D | K | L | R | K | V | N | K | S | L | M | K | C | K | P | N | D | T | K | K | L | K | P | S | K |   |   |   |   |   |   |
| NP_060101.3    | 1137 | GAVEN     | A        | A    | E      | S   | V    | S | T | F | L | K | K | Q | E | T | K | R | P | K | A | D | K | E | A | H | V | M | A | N | K | L | R | K | V | K | S | L | E | K | O | I | I | D | E | K | S | O | K | K | T | R | N |   |   |   |   |   |   |   |   |
| XP_004940975.1 | 1306 | V         | E        | N    | M      | V   | L    | L | T | M | K | K | Q | L | Q | E | R | L | K | K | L | V | I | H | S | M | C | T | Y | A | D | P | K | A | V | D | E | D | T | L | R | K | I | F | Y | R | L | R | F | Q | R | F | G | Y | V | H | Q | T | L |   |   |
| XP_027312235.1 | 1316 | A         | E        | S    | I      | I   | Q    | L | W | T | M | K | N | E | L | E | K | R | L | K | K | L | S | V | T | P | S | A | C | T | Y | A | D | P | K | A | V | D | E | D | T | L | R | K | I | F | Y | R | L | R | F | E | R | K | G | Y | L | Q | O | M | L |
| XP_013030722.1 | 1357 | M         | E        | S    | I      | I   | Q    | L | L | T | M | K | K | E | L | Q | R | L | E | K | L | S | V | I | P | S | A | C | T | Y | A | D | P | K | A | V | D | E | D | T | L | R | K | I | F | Y | R | L | R | F | E | R | K | G | Y | L | Q | E | M | L |   |
| NP_060101.3    | 1197 | V         | L        | Q    | S      | I   | H    | E | A | E | H | D | N | L | V | K | C | L | E | K | N | L | E | I | P | Q | D | C | T | Y | A | D | P | K | A | V | D | E | T | L | L | Q | K | V | E | G | R | V | K | F | E | R | K | G | E | E | L | K | A | L |   |

**Figure S13:** Schematic alignment of DDX60 protein sequences of chicken, duck, goose and human. The critical conserved residues of ATP binding and phosphorylation, lysine (K791) and tyrosine (Y793 and Y796) respectively are boxed in black

|                |     |                                                                                                                                    |
|----------------|-----|------------------------------------------------------------------------------------------------------------------------------------|
| XP_015152165.1 | 1   | M-----                                                                                                                             |
| XP_027328665.1 | 1   | MVPT <b>TRPR</b> LC <b>SMAATPPPFAQRHAVLQQRVRGAGPTLGRGHGCHRPAPRRPASRKGKRKR</b>                                                      |
| XP_013053947.1 | 1   | -----                                                                                                                              |
| NP_066363.1    | 1   | <b>MEERRPH</b> -----                                                                                                               |
|                |     |                                                                                                                                    |
| XP_015152165.1 | 2   | ----- <b>DGAGHKPLFRQPRAAGR</b> DH                                                                                                  |
| XP_027328665.1 | 61  | RRRPGRASGARGPAASGRFLPVLWGAGQPRRPAEPAAGAM <b>GAGQGPGLRRLPRAGRRGH</b>                                                                |
| XP_013053947.1 | 1   | ----- <b>GPGLRRLPRAGRRGH</b>                                                                                                       |
| NP_066363.1    | 9   | -----DAR <b>PRNSHTNH</b>                                                                                                           |
|                |     |                                                                                                                                    |
| XP_015152165.1 | 21  | ---PDV <b>AFIQRGRSGINNVSGQTNK</b> -AV <b>ROAGEDPOASNYTLPLGKRE</b> DS <b>FACTAKFFNQ</b>                                             |
| XP_027328665.1 | 121 | <b>AGRWDAGFIQGRNRINNVSGQTHK</b> -TVAQAGEN <b>PQASNYTL</b> LL <b>GQREERS</b> ---E <b>YFFSQ</b>                                      |
| XP_013053947.1 | 15  | <b>ADHWDTGFIQGRNRINSVSGQTHK</b> -TVAQAGEN <b>PQTSNYT</b> PL <b>LQREERS</b> ---E <b>CFFSR</b>                                       |
| NP_066363.1    | 20  | <b>RGPVDCGLPPRARNQANNPPANALRGGASHPCRHPRANNHPAAYWQREERFRAMGNPHQ</b>                                                                 |
|                |     |                                                                                                                                    |
| XP_015152165.1 | 77  | <b>GRRNQGGPVTSGATGHGNEQ</b> -ND <b>GRGRRYQGGQ</b> AHERARG <b>SWNVQENESR</b> E <b>RRYQGGQAH</b>                                     |
| XP_027328665.1 | 177 | <b>GRRNQGGQITNSGATGHWNEQEN</b> GRG <b>KWYRGGQ</b> THE <b>RARGPWNEQEN</b> GR <b>RRRYQGGQAY</b>                                      |
| XP_013053947.1 | 71  | <b>GRRNQGGQANS</b> GATG <b>HWNEQEN</b> GRG <b>KRYQGGQ</b> THE <b>RARGPWNEQEN</b> GR <b>RRRHQGGQAY</b>                              |
| NP_066363.1    | 80  | <b>GRRNQEGHASDEARDQRH</b> Q <b>EN</b> TR--WR <b>NGNDCRNRP</b> P <b>W</b> -----                                                     |
|                |     |                                                                                                                                    |
| XP_015152165.1 | 136 | <b>ER</b> ARG <b>SQNVQENERK</b> G <b>KQHVS</b> LG <b>QAQGRA</b> R <b>GLWNEQD</b> DE <b>VRGRRYQGGQ</b> E <b>HERV</b> R <b>GPWNE</b> |
| XP_027328665.1 | 237 | <b>DR</b> ----- <b>DRGLWNEQDNEGRVRRYQGGQACERAGGPWNM</b>                                                                            |
| XP_013053947.1 | 131 | <b>ER</b> ----- <b>DRGLWNEQDNEGRRRYQGGQAYERARGPWNM</b>                                                                             |
| NP_066363.1    | 120 | -----S-                                                                                                                            |
|                |     |                                                                                                                                    |
| XP_015152165.1 | 196 | <b>QENEGKGRRYQGG</b> ----- <b>QVQEDARGPRNREIEGKGR</b> RL <b>AGSPHF</b> NH <b>FTPGGT</b> Q <b>P</b> -                               |
| XP_027328665.1 | 271 | <b>QENEVRGRRYHSGQALS</b> G <b>QAQEDAR</b> GL <b>RNGQENEGKGR</b> SI <b>QLRRSM</b> HF <b>YQKPTPGGA</b> Q <b>LS</b>                   |
| XP_013053947.1 | 165 | <b>QENEGRGKCYQGGQALS</b> G <b>QAQEDAR</b> GL <b>RNGQENEGKGRRI</b> Q <b>PGRNTH</b> FY <b>QKPTPGGA</b> Q <b>L</b> -                  |
| NP_066363.1    | 121 | -----ND <b>NFQQR</b> T <b>PHQ</b> - <b>KP</b> -                                                                                    |



XP\_015152165.1 250 -----SEQPQQVKKIGYKFLESLLQKDSSEVVITLASSSGFKELLSQTSMKPGLQLICQ  
XP\_027328665.1 331 EQLQLSEQPQQVKKIGYKFLEGLLQKDPSEVVITLASSSGLKELLSQTSAMKPSFVQLICQ  
XP\_013053947.1 224 -----SEQPQQVKKIGYKFLEGLLQKDPSEVVITLASSSGLKELLSQTSAMKPSFVQLICQ  
NP\_066363.1 135 -----SEQPQQAKKIGYKFLESLLQKDPSEVVITLASSLGLKELLSHSSMKSNFLELICQ

---

XP\_015152165.1 305 VLRKACGSSRMDRQSVQQLLGMVKESNFKICLPQYVSDMVTEAVPAVRHQYPEHIGNIIL  
XP\_027328665.1 391 VLRKACSSRMDRQSVQQLLGVVKESNFKICLPQYVSDMVTEAVPAVRHQYPEHIGNIIL  
XP\_013053947.1 279 VLRKACSSRMDRQSVQQLLGVVKESNFKICLPQYVSDMVTEAVPAVRHQYPEHIGNIIL  
NP\_066363.1 190 VLRKACSSMDRQSVLHVLGIIKNSKFLKVCLEPAVYVGMTEPTPDTRNQYPEHTSNITIS

---

XP\_015152165.1 365 LLQDLISIFPSSSVQKISLLTVLPASINALRASGVQITEETEKNLISKVQMLVQHLQEKR  
XP\_027328665.1 451 LLQDLISIFPASSVQKISLLTVLPASINALRASGVDITEETEKNLNKVQMLVQHLQEKR  
XP\_013053947.1 339 LLQDLISIFPASSVQKISLLTVLPASINALRASGVDIMEETEKNLNKVQMLVQHLQEKR  
NP\_066363.1 250 LLQDLISVFPASSVQETSMLVSIPLPSSINALRASGVDIMEETEKNLKQVQTIIEHLQEKR

---

XP\_015152165.1 425 REGTLRADNYTLMQPQADGQEETYRTMTIYPTYDEIHHDVKPFRLRPNIIVSGRYESTNIYIL  
XP\_027328665.1 511 REGTLRADNYTLMQPQADGQEETYRTMTIYPTYNEVHHDEKPFRLRPNIIVSGRYESTSIYL  
XP\_013053947.1 399 REGTLRADNYTLMQLQADGQEETYRTMTIYPTYNEVHHDEKPFRLRPNIIVSGRYESTSIYL  
NP\_066363.1 310 REGTLRVDTYTLVQPEAEHDVESYRTMPTIYPTYNEVHLDERPFLRPNIISGKYDSTAIYL

---

XP\_015152165.1 485 DTHFRLLEDFFIKPLREGILELLQSFEKSLRKKKFFDDIRIYFDTRIIIPLCSPSGVVYK  
XP\_027328665.1 571 DTHFRLLEDFFVRPLREGISELLQSFEKGLRKKKFFDDIRIYFDTRIIIPLCSPSGVVYK  
XP\_013053947.1 459 DTHFRLLEDFFVRPLREGISELLQSFEKGLRKKKFFDDIRIYFDTRIIIPLCSPSGVVYK  
NP\_066363.1 370 DTHFRLLEDFFVRPLREGILELLQSFEKGLRKKKFFDDIRIYFDTRIIIPMCSSSGVVYK

---

XP\_015152165.1 545 VQFDIKPLKFVRWQNSRRLLYGSLVCMSSR DHFETCLFATVSNRDNALANGIVQLSFNAQ  
XP\_027328665.1 631 VQFDTKPLKFVRWQNSRRLLYGSLVCMSSK DHFETCLFATVSNRSDTLAKGIVELCFNAQ  
XP\_013053947.1 519 VQFDTKPLKFVRWQNSRRLLYGSLVCMSSK DHFETCLFATVSNRSDTLAKGIVQLCFNAQ  
NP\_066363.1 430 VQFDTKPLKFVRWQNSRRLLYGSLVCMSSK DHFETCLFATVSNRQEDLCR GIVQLCFNEQ

---

XP\_015152165.1 605 SRALLAEVQPSDSFLMVETTAYFEAYRHVLEGLQEIQEEDI PFQKYIVECDPQ KEPAYL  
XP\_027328665.1 691 SQALLAEVRPSDSFLMVETTAYFEAYRHVLEGLQEIQEEDI PFQKYIVECDAQVKEPAYL  
XP\_013053947.1 579 SQALLAEVRPSDSFLMVETTAYFEAYRHVLEGLQEIQEEDI PFQKYIVECDAQVKEPTYL  
NP\_066363.1 490 SQQLLAEVQPSDSFLMVETTAYFEAYRHVLEGLQEIQEEDI PFQKNIVECN SHVKEPRYL

---

XP\_015152165.1 665 KMDTKYNFAPLTEDTLSDEE--TYLDGLRRQNVRVLDPNQWPSMETLGLDESQMOALS LA  
XP\_027328665.1 751 TVDTTYNFAPLTEDPLADEE--RAPDGLRRQSVRVLDHNQWPSMETLGLDESQMEALRLA  
XP\_013053947.1 639 TVDTTYNFAPLTEDPLADEE--RAPDGLRRQSFHVLDPNRWPSMETLGLDESQMEALRLA  
NP\_066363.1 550 LMGGRYDFITPLIENPSATGFLRNVEGLRHPRINVLDPGOWPSKEALKLDLSOMEALQFA

---

XP\_015152165.1 723 LTKELAI IQGPPGTGKTYVGLKIVQALLTNQDAWQRIDQNSPILVVCYTNHALDQFLEGI  
XP\_027328665.1 809 LTKELAI IQGPPGTGKTYVGLKIVQALLTNKNVWQTTVQNSPILVVCYTNHALDQFLEGI  
XP\_013053947.1 697 LTKELAI IQGPPGTGKTYVGLKIVQALLTNKHVWQTTVQNSPILVVCYTNHALDQFLEGI  
NP\_066363.1 610 LTR ELAI IQGPPGTGKTYVGLKIVQALLTNESVWQISIQKFPILVVCYTNHALDQFLEGI

---

XP\_015152165.1 783 YTFQKRGIVRVGGRSNSEILKQFTLREL RKKSEFRHNLPMHLRRAYVNITCDMKHAEEEL  
XP\_027328665.1 869 YTFQKHGIVRVGGRSSSEILKQFTLRELRKKCFRHNLP MHLRRAYVNITSQMKQAEEL  
XP\_013053947.1 757 YTFQKHGIVRVGGRSSSEILKQFTLRELRKKCFRHNLP MHLRRAYVNITSQMKQAEEL  
NP\_066363.1 670 YNCQKTSIVRVGGRSNSEILKQFTLRELRNKRFRHNLPMHLRRAYMSTMQKESQEL

---

XP\_015152165.1 843 YKGAHLECTTYGVLHERHLEAFIAPQHWDSLMSGL--DDEFFYYSASRHSMLEWLGLG  
XP\_027328665.1 929 HKGAHLECTTHGVLHERHLEACIAPQHWDSL MKGL--DHEEFYYSAAQHSMLEWLGLG  
XP\_013053947.1 817 HKGAHLECTTYGVLHERHLEACIAPQHWDSL MKGL--DHEEFYYSAAQHSMLEWLGLG  
NP\_066363.1 730 HEGAKTLECTMRGVLREQYLQKYIS PQHWDSL MNGPVQDSEWICQHWKHSMMLEWLGLG

---

XP\_015152165.1 901 FTAFTQSAARNIEAENLGDQQEER EEEQEGEAEEDLLEILEEADLIQADRVIDDEDSAKA  
XP\_027328665.1 987 VTVFTQSAAEIDIEAENPGGQQ-ER EEEQEGEAE-LEIPEEADLIQADRVIDE EAAKP  
XP\_013053947.1 875 VTVFTQSAAEIDIEAENPGGQQ-ER EEEQEGEAE-LEIPEEADLIQADRVIDE EAAKP  
NP\_066363.1 790 VGSFTQSVSPA-GPENT-AQA-EGDEEEEGEEESSLEIETAEADLIQADRVIDEEVVRP

---

XP\_015152165.1 961 QRRKEEEHRAVHELAGMILLAMKLENEEEETVQPO-QKSAQWEITSSQRKKMKHKMVELH  
XP\_027328665.1 1045 QRRKEEEHRAVRELASVLLAMKLENEEEGTAPQ-QKTVQWEITAIQRKKMKQKMVELC  
XP\_013053947.1 933 QRRKEEEHRAVRELASVLLAMKLENEEEGTAPQ-QKTVQWEITASQRKKMKQKMVELR  
NP\_066363.1 847 QRRKKEESGADQELAKMILLAMRLDHCGTGTAAGQEQATGEWQTQRNQKMKKRVKDEL

---

XP\_015152165.1 1020 KLNAMSETEAYAIQDLWQLDINSRWRLYLWLQTYQGLLRRKILQHEQQYQAAAERLAEL  
XP\_027328665.1 1104 KLSAMTELEAKSIQDLWQLDLSSRWRLYLWLQTYQGFIRRILOHEQQYQAAAERLAEL  
XP\_013053947.1 992 KLSAMTELEAKSIQDLWQLDLSSRWRLYLWLQTYQGFIRRILOHEQQYQAAAERLAEL  
NP\_066363.1 907 KLNTMTAAEANEIETEDWQLDLSSRWLYRLWLQLYQADTRRKILSYERQYRTSAERVAEL

---

XP\_015152165.1 1080 RLQEDLCILKEAKVVGMTTGAAKYRQILQKVEPRIVIVEEAAEVLEAHTITTLKACQH  
XP\_027328665.1 1164 RLQEDLCILKEAKVVGMTTGAAKYRQILQKVEPRIVIVEEAAEVLEAHTITTLKACQH  
XP\_013053947.1 1052 RLQEDLCILKEAKVVGMTTGAAKYRQILQKVEPRIVIVEEAAEVLEAHTITTLKACQH  
NP\_066363.1 967 RLQEDLHILKDAQVVGMTTGAAKYRQILQKVEPRIVIVEEAAEVLEAHTIATLTKACQH

---

XP\_015152165.1 1140 LILIGDHQQLQPSANVYDLAKNFNLEVSLFERLVKVDFFPVCCLKYQHRMRPEIAQLLSPH  
XP\_027328665.1 1224 LILIGDHQQLQPSANVYDLAKNFNLEVSLFERLVKVDFFPVRCLKYQHRMRPEIAQLLSPH  
XP\_013053947.1 1112 LILIGDHQQLQPSANVYDLAKNFNLEVSLFERLVKVNFFPVRCLKYQHRMRPEIAQLLSPH  
NP\_066363.1 1027 LILIGDHQQLRPSANVYDLAKNFNLEVSLFERLVKVNIPFVRLNYQHRMCPEIARLLPH

---

XP\_015152165.1 1200 IYQDLENHPSVLKYENIKGVLNLFVVEHDFPEQEIQEGKSHQNPHEAOFVVELCKYFLC  
XP\_027328665.1 1284 IYQDLENHPSVLKYENIKGVLNLFVVEHDFPEQEIQEGKSHQNPHEARFVVELCKYFLC  
XP\_013053947.1 1172 IYQDLENHPSVLKYENIKGVLNLFVVEHDFPEQEIQEGKSHQNPHEAOFVVELCKYFLC  
NP\_066363.1 1087 IYQDLENHPSVLKYEKIKGVSNNLFVVEHDFPEQEIQEGKSHQNPHEAOFVVELCKYFLC

---

XP\_015152165.1 1260 QDYQPSQITILTITYTGQFLCLRKLMPAKTFAGVKVYVVDKYQGEENDIILLSLVRSNKEE  
XP\_027328665.1 1344 QDYLPQSQITILTITYTGQFLCLRKLMPAKTFAGVKVYVVDKYQGEENDIILLSLVRSNKEE  
XP\_013053947.1 1232 QDYLPQSQITILTITYTGQFLCLRKLMPAKTFAGVKVYVVDKYQGEENDIILLSLVRSNKEE  
NP\_066363.1 1147 QDYLPQSQITILTITYTGQFLCLRKLMPAKTFAGVRFVVDKYQGEENDIILLSLVRSNKEEG

---

XP\_015152165.1 1320 RTGFLQIPNRI CVALSRAKKGLYCI GNM RMLGKVPLWSKI IHTLREKGNIGRSL TLCCQN  
XP\_027328665.1 1404 RTGFLQIPNRI CVALSRAKKGLYCI GNM RMLGKVPLWSKI IHTLREKGNIGRSL TLCCQN  
XP\_013053947.1 1292 RTGFLQIPNRI CVALSRAKKGLYCI GNM RMLGKVPLWSKI IHTLREKGNIGRSL TLCCQN  
NP\_066363.1 1207 KVGFLQISNRICVALSRAKKGLYCI GNM RMLGKVPLWSKI IHTLRENNQIGPMRLCCQN

XP\_015152165.1 1380 HPETITTSVSTAADFSKVPEGGCSHPCEFR LDCGHVCTRACHPYD LQHKKYQCLKPCQKVL  
XP\_027328665.1 1464 HPETKTLVSTAADFSKVPEGGCSHPCEFR LSCGHVCTRACHPYD LQHKKYQCLKPCQKVL  
XP\_013053947.1 1352 HPETKTLVSTAADFSKVPEGGCSHPCEFR LSCGHVCTRACHPYD LQHKKYQCLKPCQKVL  
NP\_066363.1 1267 HPETHTLVSKASDFQKVPEGGCSLPCEFR LDCGHVCTRACHPYDSSHKEIQCMKPCQKVI

XP\_015152165.1 1440 CTEGHRCP LLYCEPCGPCM VIVEKI IY PKCGHLQMI PCSCP GSKFI COEPC KKKLNCGHTC  
XP\_027328665.1 1524 CAKGHR CQQSCYEP CGPCM VIVEKTI SKCGHLQMVPCSCP DSEFVCQEPCKKKLNCGHTC  
XP\_013053947.1 1412 CTKGHR CLOSCYEP CGPCM VIVEKTI SKCGHLQMVPCSCP DSEFVCQEPCKKKLNCGHTC  
NP\_066363.1 1327 COEGHR CPLVCEQEP CQV KVPKTI PRCGHEQMVPCSVPE SDFCCQEPCKSKSLRCGHR

XP\_015152165.1 1500 NRKCGQECTTRCP ELVTVF LQCGHRQKVCWIT DATKHQ KSV ECKMAKCSVKLECGHECS  
XP\_027328665.1 1584 NRFCGQECTTRCP ELVKVTLQCGH QKVKCWITEEMKHG KPVECKTKCSVTLECGHACS  
XP\_013053947.1 1472 NRFCGQECTARCPELVEVTLQCGHSQV KVCWITEEMKHG KPVECKTKCSVTLECGHVCS  
NP\_066363.1 1387 SHPCGEDCVQLCSEMT KLKCGHSQV KCGHVEGLY GLLVKCTTKCGTILDCGHPCP

XP\_015152165.1 1559 GSCHTCFEGGRFHKPCSSPCKR L CSHKCOQPCTTECPPCQLDCQNHCVHSRCKKKCGER  
XP\_027328665.1 1643 GSCHTCFEGGRFHKPCSSPCKRFL CSHKCOQPCTTECPPCQLDCQNHCVHSRCKKKCGER  
XP\_013053947.1 1531 GSCHTCFEGGRFHKPCSSPCKRFL CSHKCRQPCTTECPPCQLDCQNHCVHSRCKKKCGER  
NP\_066363.1 1447 GSCHSCFEGGRHERCQPCKRLL CSHKCOEPCIGECPPCQRTCQNR CVHSQCKKKCGEL

XP\_015152165.1 1619 CSPCAEPC EWRCQHYQCTNL CSEPCNRPRCN PCTKLLRCGHPCIGFCGEPCPKKCLVCD  
XP\_027328665.1 1703 CFPCVEPC EWRCQHYQCTNL CSEPCNRPRCDVPCTKLLRCGHPCIGLCGEPCPKKCLVCD  
XP\_013053947.1 1591 CFPCVEPC EWRCQHYQCTNL CSEPCNRPRCNVPCTKLLRCGHPCIGLCGEPCPKKCLVCD  
NP\_066363.1 1507 CSPCVEPC VWRQHYQCTKLCSEPCNRPPCYVPCTKLLVCGHPCIGLCGEPCPKKCRICH

XP\_015152165.1 1679 REEVTQIFFGFEDDPDARFVQLED CGH FESQGLD RYMDED--DD-VIKLKVCPVCQTPV  
XP\_027328665.1 1763 HEEVTQIFFGFEDDPDARFVQLED CGH FESQGLD RYMDED--DD-VIKLKVCPVCQTPV  
XP\_013053947.1 1651 HEEVTQIFFGFEDDPDARFVQLED CGH FESQGLD RYMDED--DD-VIKLKVCPVCQTPV  
NP\_066363.1 1567 MDEV TQIFFGFEDDPDARFVQLED CS H FEFVQALDR YMNEQKDD E VAI R LKVCP VCQVPI

---

XP\_015152165.1 1736 RKS LRYGTIVK KHLV EIEKVKEKI QGPA REIESSRRRLQAAL TSKS V LKRNLLTKYLMLE  
XP\_027328665.1 1820 RKNLRYGTIVKRR LDEIEKVKEKI QGPAQEIESSRRLQAALIGNAVLQRNLP HKYLMLE  
XP\_013053947.1 1708 RKNLRYGTIVKRR LDEIEKVKEKI QGPAQEIESSRRRLQAALIGNAVLQRNLP HKYLMLE  
NP\_066363.1 1627 RKNLRYGTSIKORLFEIEIIEKEKI QGSAGETATSQERL KALLERKS LHQLLPEDEFLMLK

---

XP\_015152165.1 1796 DQ LNASDLSIKSIGVIENQLNFYER IADLTSS SKIDEKEQKGKKRLDEVQEWLDRPRL  
XP\_027328665.1 1880 DKLKASDLSIKSIGLIENQLNFYKRVADLTDS SKIDVNERKGLKKRLDEVQEWLDMPRI  
XP\_013053947.1 1768 DKLKASDLSIKSIGLIENQLNFYKRVADLTDS SKIDVNERKGLKKRLDEVQEWLDPRI  
NP\_066363.1 1687 EKLAQKNLSVKDILGLV ENY SFYDH IASLWDS KKMHVLEEKRVTRLEQVHEWLAKKRL

---

XP\_015152165.1 1856 SFTROELMDLQAEIQRLTYLQHLLSRCKGRSGMITTTLAKIAIVREILEGTKKFTKKEE  
XP\_027328665.1 1940 SFTGQELSDLQAEIQRLTLQSLLSRCKSASGMITTAALAEIACVREILEGTKKFTKFADE  
XP\_013053947.1 1828 SFTGQELSDLQAEIQRLTLQSLLSRCKSASGMITTAALAEIASVREILEGTKKFTKFADE  
NP\_066363.1 1747 SFTSQELSDLRSEIQRLTYLVNLLRYKIAEKKVKDSIAVEVYSVQNILEKTKCKFTQEDE

---

XP\_015152165.1 1916 AAVKAE LKH SAALP SGLGI EAERVQIVS AIGCPRGHWFKCRNGHIYVIGDCGGAMER  
XP\_027328665.1 2000 AAVKAQLERLCTALPVSGLGISEAERVQIVRAIGCPRGHWFKCRNGHIYVIGDCGGAMER  
XP\_013053947.1 1888 AAVKAE LERLCTALPVSGLGISEAERVQIVRAIGCPRGHWFKCRNGHIYVIGDCGGAMER  
NP\_066363.1 1807 QLVQEKMEALKATLPC SGLGISEAERVQIVS AIGYPRGHWFKCRNGHIYVIGDCGGAMER

---

XP\_015152165.1 1976 SRCPECHEVIGGANHALDSTNSLAPEMDGATHAAWSETANNLLNFQDLQRLRLL  
XP\_027328665.1 2060 SRCPECHAVIGGTNHALDSTNSLAPEMDGATHAAWSETANNLLNFEEIRLRL  
XP\_013053947.1 1948 SKCPECHAVIGGTNHTLSDSTNSLAPEMDGATHAAWSEANNLLNFEEIRLRL  
NP\_066363.1 1867 GTCPECKE VIGGTNHTLERSNQLASEMDGAOHAAWSDTANNLLNFEEIQGMM

---

**Figure S14:** The protein sequences of chicken, mallard, goose and human ZNFX1 aligned using the ClustalW program. The armadillo, P-loop and zinc finger domains are indicated below the sequence in black line, blue line, and red line respectively.

XP\_419881.4 1 MEETAAAGRCQRRQRAAFPRATRGRGTAARRRGSTAREASADEQPAD-----EASRAVW---  
XP\_027310983.1 1 MEQPGP---GRRQRAVRSKGGAGRGSS-----GGEPRREGGPAISGRER---  
XP\_013027663.1 1 MLSLK---L--KKGVTSGHCCSPQOSC-----NASE  
NP\_612450.2 1 MOPWH---GKAMQRASEAAGATAPKASARNA-----RCAPMPTESPAAPEAAIPKA

XP\_419881.4 53 -----FRR-TAQQGE-----PP  
XP\_027310983.1 43 -----PARAAPGGGR-----RP  
XP\_013027663.1 27  
NP\_612450.2 49 GKFGPARKSGSRQKKSAPDTCERPPVVRATGARAKKAPQRAQDTQPSDATSAPGAEGLEPP

XP\_419881.4 64 VPR-----ILSARSRACGLRLREV  
XP\_027310983.1 55 GGSAE-----GGEAAVAVPPRLRLRAV  
XP\_013027663.1 27  
NP\_612450.2 109 AAREPALSRRAGSCRQARGARCTKPRPPPGPWPVSPGLPVSAPTIVRDAAPGASLRAV

XP\_419881.4 84 LSQLSLGRQDVSEASGLVNVVSHLIQAIRGRDGSFSSIRRLGAGSYEYEHVKISEPNEFD  
XP\_027310983.1 77 LSQLSLGRFDVSEASGLVNVVSHLIQAIRGRDGFGLISRLGAGSYEYEVKISEPNEFD  
XP\_013027663.1 27 -----PEISSYFTPVDVNTPRHSCISEPNEFD  
NP\_612450.2 169 LEKIKLSRDDISTAACVVKGVVDHLLRLK-CDSAFRGVGLNLTGSYYEYEHVKISAPNEFD

XP\_419881.4 144 IMLVMPVTRIQLDESDDTGAYYYLTFKRNPKKEYLNRFLEDGKLSAKMLIEDLRRIKE  
XP\_027310983.1 137 IMLVMPARIQLDECDDTGAYYYLTFKRNPKKEYLNRFLEDGKLSADKMLTALRKRIKE  
XP\_013027663.1 54 IMLVMPVTRIQLDECDDTGAYYYLTFKRNPKKEYLNRFLEDGKLSAKMRTALRIKE  
NP\_612450.2 228 VMFKIEVPRIQLIEYSNTRAYYFVKFKRNPKENPLSQFLIG-EILSASKMLKFRKRIKE

XP\_419881.4 204 EIKIKNEVTVKRRKFGSPAITLLIKKPPAEISVDIILALEVQSWPSTQDGLNIEW  
XP\_027310983.1 197 EVKNIKDVETVKRRKARSPAITLLIKNSSAEISVDIILALEVQSWPSTQDGLNIEW  
XP\_013027663.1 114 EVKNIKDVETVKRMKAGSPAITLLIKKSSAEISVDIILALEVQSWPSTQDGLNIEW  
NP\_612450.2 287 EINDIKDTIIVIKRRKGGSPAITLLIS---EKISVDITLALSKSWPASTQGLRIQNW

XP\_419881.4 264 LGRKVRREIRYKPIYLVAQONKKEKIPRGNTWRLSFSHIEKAMNNHGSIKTCCEDGVK  
XP\_027310983.1 257 LGRKVRRELNRNKPIYLVAQONKKEKVPRGNTWRISFSHIEKAMNNHGSIKTCCETDGA  
XP\_013027663.1 174 LGRKVRRELNRNKPIYLVAQONKKEKVLTGNTWRLSFSHIEKAMNNHGSIKTCCETDGA  
NP\_612450.2 344 LSAKVRQLRLKFFYLVPKHAKGNGFQOETWRLSFSHIEKELNNHCKSKTCCENKEEK

XP\_419881.4 324 CCRKDCLKLLKYLLEKLM--KHAKLEKFCSYHVKTAFHFSCVIWPSDTDWQHENLEHC  
XP\_027310983.1 317 CCRKDCLKLLKYLLEKLM--KYTKELEKFCSYHVKTAFHFSCVIWPNDDWQYENLEHC  
XP\_013027663.1 234 CCRKDCLKLLKYLLEKLM--KHAKLEKFCSYHVKTAFHFSCVIWPNDDWQYENLEHC  
NP\_612450.2 404 CCRKDCLKLLKYLLEQLKEREKDKKHLKFSYHVKTAFHFVCTQNEPDSQMDRDKDGLC

XP\_419881.4 382 FQKYLEYFLRCLQDSQLPHFFIPOYNLLSL--DDKASNFLIGQINYQLNNGFPVHGV-  
XP\_027310983.1 375 FQNYLGYFLRCLQDSQLPHFFIPOYNLLSP--DDKASNHFLSRQINDQLNRFPFQQGY  
XP\_013027663.1 292 FQN LGYFLRCLQDSQLPHFFIPOYNLLSL--DDKASNFLSRQINYQLNNGFPVFOQTK  
NP\_612450.2 464 FDNCTYFLQCLRTEKLENMFIPENLFSNLI DKRSKFLRQIEYERNNEFPVDFE-

XP\_419881.4 -----  
XP\_027310983.1 433 -----  
XP\_013027663.1 350 KVIYSNYLKANHVDLHTVKHV  
NP\_612450.2 -----

**Figure S15:** The protein sequences of chcGAS, ducGAS, gocGAS, hucGAS aligned using the ClustalW program. Conserved amino acids and synonymous substitutions are shadowed in black and gray, respectively. The N-terminal tail, spine, activation loop, zinc finger and conserved catalytic residues are indicated below the sequence in black line, orange line, blue line, green line and black triangles respectively. The red and purple lines underneath indicate  $\alpha/\beta$  core and helix bundle respectively. Catalytic residues are highlighted with black triangles. Conserved leucine involved in dsDNA binding is highlighted with grey triangle.



XP\_025010645.1 1 MPQDPST  
XP\_027323921.1 1 MSQEPQR  
XP\_013057484.1 1 MSQPAASPCAAQGRIPAGQGTSWKFSVGGPLPRLHPLPAPAIAPFIFTSLLLIGFSGTMRLC  
NP\_938023.1 1 MPHSSLH-----

XP\_025010645.1 8 ---RSSPARLLIEPRAGRARHAAQVLLAVGFVVLHLSGEP LAP IIRSVCIQLAALQLGV  
XP\_027323921.1 8 ---RSSPAALLIEKPREGRAQRAVYVLLATCTVALCTAGEPI SPAHRVSAHLAALQLGA  
XP\_013057484.1 61 PRHREQAALLAAAASEGRKRKCLSGLGA-----AHARSARS PGSSQCRGR  
NP\_938023.1 8 -----PSIPCRGHGAQKAAVLLSACLVTLLGLGEPPEHTLRYIVLHLASLQLGL

XP\_025010645.1 65 LL-----KGCCLAEEIFHLH SRHHGSL-----WQ-VIICSCFP-  
XP\_027323921.1 65 LL-----KGCCLAEEIFHLH QSRYRGSF-----WR-ALSACFP-  
XP\_013057484.1 108 GRSDVSGTAAPEQPHCL---APQGGRLSAARGVRPPGHLHRGAVPGWGAQVTRCQPF-  
NP\_938023.1 59 LL-----NGVCSLAEELRHHSRYRGSY-----WR-TVRACLGC

XP\_025010645.1 97 PRWYL-----ALLLGG SAYLDPEEDNCHSERLALITLSCLCQLLVLALGLQKLSAV  
XP\_027323921.1 97 PRWYL-----ALLLGG SAYLDLQQCERLSP--HLALCLCLLALALGLQKLSAV  
XP\_013057484.1 163 PHRPPGSPADRDLAQGLL PGRDLP-----PFV  
NP\_938023.1 92 PLRFG-----ALLLSIYFYYSLPNAVCPPTWMLALGLSCALNLLGLKGLAPA

XP\_025010645.1 148 EIS-ELTESSKKNVAHGLAWSYY---C-----YLVVLP  
XP\_027323921.1 146 EIS-EVTESSQKNVAHGLAWSYY---C-----YLVVLP  
XP\_013057484.1 192 QIPRQLLEGAERVPTTLAPGPAHRWLSLPGPAAGRQAQPLPCPDLPVPSRPRPRPRAAG  
NP\_938023.1 143 EIS-AVCEKGNFVAHGLAWSYY---C-----YLRLLDE

XP\_025010645.1 180 KECEMEE SRTNPMRAHR TWKHLHILPLGCDI WDDLEKADSNIQYLADLPETILTRAG  
XP\_027323921.1 178 KECEMEEISRANINWACRETWKHLHILPLSCNVWDDLEKADSNIQYLTDLTETTLTRAG  
XP\_013057484.1 252 KESMEEISKANPNWACRETWKHLHILPLSCNVWDDLEKADSNIQYLTDLTETTLTRAG  
NP\_938023.1 175 IQARIRTYNQHYNNLRGAVSQRLYILPLDCGVPENLSMADFNIRLIDKLPQQTGDHAG

XP\_025010645.1 240 IKR R VYKHSLYVIRDKDKLRPCVIEFA PLQTLQAMSQDCAAFSREDRLEQAKLFYRS  
XP\_027323921.1 238 IKR R VYKHSLYAIRDGDNQARHCAVEFATPLQTLYAMSQDECAAFSREDRLEQAKLFYRT  
XP\_013057484.1 312 IKR R VYKHSFYAIRDGDNQARHCAVEYATPLQTLYAMSQDECAAFSREDRLEQAKLFYRT  
NP\_938023.1 235 IKDRVYNSIYELENGRAGTCVIEYATPLQTLAMSQYSQACFSREDRLEQAKLFRT

XP\_025010645.1 300 LREILGSKECAGLYRLIAYEPAEFESHFLSGLILWHLQQQREEMVQEELEPL-----  
XP\_027323921.1 298 LEIILGSKECAGTYRLIAYEELVEAEPHFLSREILWHLRQQQEEFTVYEGSPRRLAT  
XP\_013057484.1 372 LEIILGSKECTGTYRLIAYEEPREAEPHFLSREILWHLRQQQEEFTVYEGSPRRLAT  
NP\_938023.1 295 LEIILADAFESQNNCRRLIAYQEPADSSFSLSQELRHLRQEEKEEVTVGSLKTSVAPST

XP\_025010645.1 355 CTSVLSLQSSSDLPQLRSDCF  
XP\_027323921.1 358 ALGSTDLSLQISASDLPQLRSDHP  
XP\_013057484.1 432 ALGSTDLSLQISASDLPQLRSDHP  
NP\_938023.1 355 STMSQEPellisMKPLPLRDFS

**Figure S16:** The protein sequences of chSTING, duSTING, goSTING and huSTING aligned using the ClustalW program. Conserved amino acids and synonymous substitutions are shadowed in black and gray, respectively. The TM domains 1, 2, 3, and 4 are indicated below the sequence in black lines. The cyclic dinucleotide binding domain and C-terminal tail are underscored by orange and grey lines respectively. Residues involved in cyclic dinucleotide binding are highlighted using black triangles. pLxIS motif is underscored in blue

|                |     |                                                               |
|----------------|-----|---------------------------------------------------------------|
| NP_001185786.1 | 1   | MNSLEQAEDLKAFERRLTEYIACLQPATGRWRMILIVSVCTATGAWNWLIDPETQKVSF   |
| XP_027323010.1 | 1   | MNSLEQAEDLKAFERRLTEYIACLQPATGRWRMILIVSVCTATGAWNWLIDPETQKVSF   |
| XP_013042385.1 | 1   | MI----IADLKAFERRLTEYIACLQPATGRWRMILIVSVCTATGAWNWLIDPETQKVSF   |
| NP_694993.2    | 1   | MNSLEQAEDLKAFERRLTEYIHCLQPATGRWRMILIVSVCTATGAWNWLIDPETQKVSF   |
|                |     | —————                                                         |
| NP_001185786.1 | 61  | FTSLWNHPFFTISCITLIGLFFAGIHKRVVAPSI IAARCRTVLAEYNMSCDDTGKLILKP |
| XP_027323010.1 | 61  | FTSLWNHPFFTISCITLIGLFFAGIHKRVVAPSI IAARCRTVLAEYNMSCDDTGKLILKP |
| XP_013042385.1 | 57  | FTSLWNHPFFTISCITLIGLFFAGIHKRVVAPSI IAARCRTVLAEYNMSCDDTGKLILKP |
| NP_694993.2    | 61  | FTSLWNHPFFTISCITLIGLFFAGIHKRVVAPSI IAARCRTVLAEYNMSCDDTGKLILKP |
|                |     | —————                                                         |
| NP_001185786.1 | 121 | RPHVQ                                                         |
| XP_027323010.1 | 121 | RPHVQ                                                         |
| XP_013042385.1 | 117 | RPHVQ                                                         |
| NP_694993.2    | 121 | RPHVQ                                                         |

**Figure S17:** The ERADp protein sequences of chicken, duck, goose and human aligned using the ClustalW program. Conserved amino acids and synonymous substitutions are shadowed in black and gray, respectively. The transmembrane (TM) domains 1 and 2 are indicated below the sequence in black lines. Sequences preceding TM1 and after TM2 comprise N- and C-terminal regions respectively.

|                |     |                                                                                          |
|----------------|-----|------------------------------------------------------------------------------------------|
| NP_001336637.1 | 355 | TIFS <del>Y</del> FKGQRQTLLFSATMPKKIQNFAKSALVKPITINVGRAGAASLDVVQEVEYVKEEA                |
| XP_027324165.1 | 356 | TIFS <del>Y</del> FKGQRQTLLFSATMPKKIQNFAKSALVKPITINVGRAGAASLDVVQEVEYVKEEA                |
| XP_013047316.1 | 234 | TIFS <del>Y</del> FKGQRQTLLFSATMPKKIQNFAKSALVKPITINVGRAGAASLDVVQEVEYVKEEA                |
| NP_057306.2    | 360 | TIFS <del>Y</del> FKGQRQTLLFSATMPKKIQNFAKSALVKPITINVGRAGAASLDVVQEVEYVKEEA                |
| <hr/>          |     |                                                                                          |
| NP_001336637.1 | 415 | KMVYLLLECLQKTPPPVLIFAEKKADVDAIHEYLLLLKGV <del>E</del> AVAIHGGK <del>D</del> QEERTKAIEAFR |
| XP_027324165.1 | 416 | KMVYLLLECLQKTPPPVLIFAEKKADVDAIHEYLLLLKGV <del>E</del> AVAIHGGK <del>D</del> QEERTKAIEAFR |
| XP_013047316.1 | 294 | KMVYLLLECLQKTPPPVLIFAEKKADVDAIHEYLLLLKGV <del>E</del> AVAIHGGK <del>D</del> QEERTKAIEAFR |
| NP_057306.2    | 420 | KMVYLLLECLQKTPPPVLIFAEKKADVDAIHEYLLLLKGV <del>E</del> AVAIHGGK <del>D</del> QEERTKAIEAFR |
| <hr/>          |     |                                                                                          |
| NP_001336637.1 | 475 | DGKKDVLVATDVASKGLDFPAIQHVINYDMPEEIE <del>N</del> YVHRIGRTGRSGNTGIATTFINKA                |
| XP_027324165.1 | 476 | DGKKDVLVATDVASKGLDFPAIQHVINYDMPEEIE <del>N</del> YVHRIGRTGRSGNTGIATTFINKA                |
| XP_013047316.1 | 354 | DGKKDVLVATDVASKGLDFPAIQHVINYDMPEEIE <del>N</del> YVHRIGRTGRSGNTGIATTFINKA                |
| NP_057306.2    | 480 | DGKKDVLVATDVASKGLDFPAIQHVINYDMPEEIE <del>N</del> YVHRIGRTGRSGNTGIATTFINKA                |
| <hr/>          |     |                                                                                          |
| NP_001336637.1 | 535 | CDES <del>V</del> LMDLKALLLEAKQKVPVVLQVLHCGDE <del>T</del> MLDIGGERGCAFCGGLGHRITDCPKLE   |
| XP_027324165.1 | 536 | CDES <del>V</del> LMDLKALLLEAKQKVPVVLQVLHCGDE <del>T</del> MLDIGGERGCAFCGGLGHRITDCPKLE   |
| XP_013047316.1 | 414 | CDES <del>V</del> LMDLKALLLEAKQKVPVVLQVLHCGDE <del>T</del> MLDIGGERGCAFCGGLGHRITDCPKLE   |
| NP_057306.2    | 540 | CDES <del>V</del> LMDLKALLLEAKQKVPVVLQVLHCGDE <del>S</del> MLDIGGERGCAFCGGLGHRITDCPKLE   |
| <hr/>          |     |                                                                                          |
| NP_001336637.1 | 595 | AMQTKQVSNIGRKDYLAHSSMDF                                                                  |
| XP_027324165.1 | 596 | AMQTKQVSNIGRKDYLAHSSMDF                                                                  |
| XP_013047316.1 | 474 | AMQTKQVSNIGRKDYLAHSSMDF                                                                  |
| NP_057306.2    | 600 | AMQTKQVSNIGRKDYLAHSSMDF                                                                  |

**Figure S18:** Schematic alignment of DDX41 protein sequences of chicken, duck, goose and human. Depicted are DEAD box region, HelicC and zinc finger domains in black, red and green underlining respectively. The DEAD box is boxed in blue.

|                |     |                                                                                      |
|----------------|-----|--------------------------------------------------------------------------------------|
| XP_025002966.1 | 1   | MPRG----DR <b>ESDW</b> REKEQFRKLFIGGLSFETTEESLRNYEQWGKLTDCVVMRDPASKR                 |
| XP_021129883.1 | 1   | <b>ME</b> T----- <b>SKEREKEQFRKLFIGGLSFETTEESLRNYEQWGKLTDCVVMRDPASKR</b>             |
| XP_013027335.1 | 1   | <b>ME</b> T----- <b>SKEREKEQFRKLFIGGLSFETTEESLRNYEQWGKLTDCVVMRDPASKR</b>             |
| NP_112533.1    | 1   | <b>ME</b> KTLETVPL <b>ER</b> KK <b>REKEQFRKLFIGGLSFETTEESLRNYEQWGKLTDCVVMRDPASKR</b> |
| <hr/>          |     |                                                                                      |
| XP_025002966.1 | 57  | <b>SRGFGFVTFSSMAEVDAMAARPH</b> TIDGRVVEPKRAVAREESGKPGAHVTVKKLFVGGIK                  |
| XP_021129883.1 | 53  | <b>SRGFGFVTFSSMAEVDAMAARPH</b> TIDGRVVEPKRAVAREESGKPGAHVTVKKLFVGGIK                  |
| XP_013027335.1 | 53  | <b>SRGFGFVTFSSMAEVDAMAARPH</b> TIDGRVVEPKRAVAREESGKPGAHVTVKKLFVGGIK                  |
| NP_112533.1    | 61  | <b>SRGFGFVTFSSMAEVDAMAARPH</b> SIDGRVVEPKRAVAREESGKPGAHVTVKKLFVGGIK                  |
| <hr/>          |     |                                                                                      |
| XP_025002966.1 | 117 | <b>EDTEEHHLRDYFEEYGKIDTIEIITDRQSGKKR</b> GFVTFDDHDPVDKIVLQKYHTINGH                   |
| XP_021129883.1 | 113 | <b>EDTEEHHLRDYFEEYGKIDTIEIITDRQSGKKR</b> GFVTFDDHDPVDKIVLQKYHTINGH                   |
| XP_013027335.1 | 113 | <b>EDTEEHHLRDYFEEYGKIDTIEIITDRQSGKKR</b> GFVTFDDHDPVDKIVLQKYHTINGH                   |
| NP_112533.1    | 121 | <b>EDTEEHHLRDYFEEYGKIDTIEIITDRQSGKKR</b> GFVTFDDHDPVDKIVLQKYHTINGH                   |
| <hr/>          |     |                                                                                      |
| XP_025002966.1 | 177 | <b>NAEVRKALSRQEMQEVQNSRSRGRGNF</b> GFGDARGGGNFGPGPGSNFRGGAGKTDGYGSG                  |
| XP_021129883.1 | 173 | <b>NAEVRKALSRQEMQEVQNSRSRGRGNF</b> GFGDARGGGNFGPGPGSNFRGGAGKTDGYGSG                  |
| XP_013027335.1 | 173 | <b>NAEVRKALSRQEMQEVQNSRSRGRGNF</b> GFGDARGGGNFGPGPGSNFRGGAGKTDGYGSG                  |
| NP_112533.1    | 181 | <b>NAEVRKALSRQEMQEVQNSRSRGRGNF</b> GFGDARGGGNFGPGPGSNFRGG---SDGYGSG                  |
| <hr/>          |     |                                                                                      |
| XP_025002966.1 | 237 | <b>RGFGDGYNGYGGGPPGGNF</b> GGSPGYGGGRGGYGGGGPGYGNQGGGYGGGYDNYGGGNYGS                 |
| XP_021129883.1 | 233 | <b>RGFGDGYNGYGGGPPGGNF</b> GGSPGYGGGRGGYGGGGPGYGNQGGGYGGGYDNYGGGNYGS                 |
| XP_013027335.1 | 233 | <b>RGFGDGYNGYGGGPPGGNF</b> GGSPGYGGGRGGYGGGGPGYGNQGGGYGGGYDNYGGGNYGS                 |
| NP_112533.1    | 238 | <b>RGFGDGYNGYGGGPPGGNF</b> GGSPGYGGGRGGYGGGGPGYGNQGGGYGGGYDNYGGGNYGS                 |
| <hr/>          |     |                                                                                      |
| XP_025002966.1 | 297 | <b>GNYNDFGNYNQQPSNYGPMKSGNF</b> GGSRNMGGPYGGGNYGPGGSGGSGGYGGRSRY                     |
| XP_021129883.1 | 293 | <b>GNYNDFGNYNQQPSNYGPMKSGNF</b> GGSRNMGGPYGGGNYGPGGSGGSGGYGGRSRY                     |
| XP_013027335.1 | 293 | <b>GNYNDFGNYNQQPSNYGPMKSGNF</b> GGSRNMGGPYGGGNYGPGGSGGSGGYGGRSRY                     |
| NP_112533.1    | 298 | <b>GNYNDFGNYNQQPSNYGPMKSGNF</b> GGSRNMGGPYGGGNYGPGGSGGSGGYGGRSRY                     |

**Figure S19:** Schematic alignment of hnRNPA2B1 protein sequences of chicken, duck, goose and human. Depicted are RNA recognition motif domains 1 and 2 in black, and prion-line domain in grey underlining respectively. Note: Amino acids critical for hnRNPA2B1 dimerization (P93, K94, R95, V184, R185, K186; human numbering) and methylation (R238) are conserved across human and avian
